# Supplementary material
Source: PubMed Central journal article supplement (PMC7788510)
Supplement: jamadermatol-e205213-s001.pdf [file jamadermatol-e205213-s001.pdf]

## Supplemental Online Content

Fried LJ, Tan A, Berry EG, et al. Dermoscopy proficiency expectations for US dermatology resident physicians: results of a modified Delphi survey of pigmented lesion experts. *JAMA Dermatol*. Published online January 6, 2021. doi:10.1001/jamadermatol.2020.5213

**eTable.** Respondent demographics (n=26)

**eMethods.** Survey data

This supplemental material has been provided by the authors to give readers additional information about their work.

**eTable. Respondent demographics (N=26)**

| <b>Years of Experience after Dermatology Residency (N=26)</b>                                              |                   |                  |                       |                    |                     |
|------------------------------------------------------------------------------------------------------------|-------------------|------------------|-----------------------|--------------------|---------------------|
| <b>Years</b>                                                                                               | <b>&lt;1 year</b> | <b>1-5 years</b> | <b>6-10 years</b>     | <b>11-15 years</b> | <b>&gt;15 years</b> |
| <b># (%) of panelists</b>                                                                                  | 1 (4%)            | 6 (23%)          | 5 (19%)               | 4 (15%)            | 10 (39%)            |
| <b>Specialization in Pigmented Lesions, Dermoscopy, or Melanoma (N=26)</b>                                 |                   |                  |                       |                    |                     |
| Responded “No”                                                                                             |                   |                  | 2 (8% of panelists)   |                    |                     |
| Responded “Yes”                                                                                            |                   |                  | 24 (92% of panelists) |                    |                     |
| <b>Number of years specializing in pigmented lesions and melanoma as an attending dermatologist (N=24)</b> |                   |                  |                       |                    |                     |
| <b>Years</b>                                                                                               | <b>&lt;1 year</b> | <b>1-5 years</b> | <b>6-10 years</b>     | <b>11-15 years</b> | <b>&gt;15 years</b> |
| <b># (%) of panelists</b>                                                                                  | 1 (4%)            | 8 (33%)          | 5 (21%)               | 4 (17%)            | 6 (25%)             |
| <b>Number of Years using Dermoscopy (N=26)</b>                                                             |                   |                  |                       |                    |                     |
| <b>Years</b>                                                                                               | <b>&lt;1 year</b> | <b>1-5 years</b> | <b>6-10 years</b>     | <b>11-15 years</b> | <b>&gt;15 years</b> |
| <b># (%) of panelists</b>                                                                                  | 0 (0%)            | 0 (0%)           | 10 (38%)              | 10 (38%)           | 6 (23%)             |
| <b>Dermoscopy Teaching to Residents by Panelists (N=26)</b>                                                |                   |                  |                       |                    |                     |
| Dermoscopy Education in Clinic                                                                             |                   |                  | 24 (92% of panelists) |                    |                     |
| Dermoscopy Education in Lecture Format                                                                     |                   |                  | 24 (92% of panelists) |                    |                     |

**eMethods. Survey data**

**DERMATOLOGIC DIAGNOSES: ROUND 1**

**Nonmelanocytic Lesions**

We would like to identify the diagnoses that should be included in the dermoscopy core competency for dermatology residents. Please rate how strongly you would agree or disagree.

|                                                   | Strongly Disagree | Disagree | Neutral | Agree | Strongly Agree |
|---------------------------------------------------|-------------------|----------|---------|-------|----------------|
| Basal cell carcinoma                              |                   |          |         |       |                |
| Actinic keratosis                                 |                   |          |         |       |                |
| Pigmented actinic keratosis                       |                   |          |         |       |                |
| Bowen's disease (squamous cell carcinoma in situ) |                   |          |         |       |                |
| Keratoacanthoma                                   |                   |          |         |       |                |
| Squamous cell carcinoma                           |                   |          |         |       |                |
| Solar lentigo                                     |                   |          |         |       |                |
| Simple lentigo (lentigo simplex)                  |                   |          |         |       |                |
| Seborrheic keratosis                              |                   |          |         |       |                |
| Hemangioma / angioma                              |                   |          |         |       |                |
| Lichen planus-like keratosis                      |                   |          |         |       |                |
| Angiokeratoma                                     |                   |          |         |       |                |
| Dermatofibroma                                    |                   |          |         |       |                |
| Clear cell acanthoma                              |                   |          |         |       |                |
| Sebaceous hyperplasia                             |                   |          |         |       |                |

Please include any additional comments here \_\_\_\_\_

**Benign Melanocytic Lesions**

We would like to identify the diagnoses that should be included in the dermoscopy core competency for dermatology residents. Please rate how strongly you would agree or disagree.

|                                                           | Strongly Disagree | Disagree | Neutral | Agree | Strongly Agree |
|-----------------------------------------------------------|-------------------|----------|---------|-------|----------------|
| Overview of benign nevi patterns (i.e. globular, network) |                   |          |         |       |                |
| Congenital melanocytic nevi                               |                   |          |         |       |                |
| Intradermal                                               |                   |          |         |       |                |

|                             |  |  |  |  |  |
|-----------------------------|--|--|--|--|--|
| nevi                        |  |  |  |  |  |
| Blue nevi                   |  |  |  |  |  |
| Spitz nevi                  |  |  |  |  |  |
| Recurrent (persistent) nevi |  |  |  |  |  |

Please include any additional comments here \_\_\_\_\_

**Melanoma**

We would like to identify the diagnoses that should be included in the dermoscopy core competency for dermatology residents. Please rate how strongly you would agree or disagree.

|                                                                                      | Strongly Disagree | Disagree | Neutral | Agree | Strongly Agree |
|--------------------------------------------------------------------------------------|-------------------|----------|---------|-------|----------------|
| Overview of melanoma characteristics (i.e. blue-white veil, regression structures)   |                   |          |         |       |                |
| Acral lentiginous melanoma                                                           |                   |          |         |       |                |
| Lentigo maligna melanoma (melanoma on chronically sun-damaged skin of the head/neck) |                   |          |         |       |                |

Please include any additional comments here \_\_\_\_\_

**Special Sites**

We would like to identify the diagnoses that should be included in the dermoscopy core competency for dermatology residents. Please rate how strongly you would agree or disagree.

|                                                  | Strongly Disagree | Disagree | Neutral | Agree | Strongly Agree |
|--------------------------------------------------|-------------------|----------|---------|-------|----------------|
| Dermoscopic features of the face (pseudonetwork) |                   |          |         |       |                |
| Dermoscopic features of acral lesions            |                   |          |         |       |                |

Please include any additional comments here \_\_\_\_\_

If there are any other diagnoses or special sites you feel should be added, please include them here. \_\_\_\_\_

## DERMATOLOGIC DIAGNOSES: ROUND 2

### Nonmelanocytic Lesions

We would like to identify additional diagnoses (based on comments submitted by panelists in the "Diagnoses - Round 1" survey) that should be included in the dermoscopy core competency for dermatology residents. Please rate how strongly you would agree or disagree.

|        | Strongly Disagree | Disagree | Neutral | Agree | Strongly Agree |
|--------|-------------------|----------|---------|-------|----------------|
| Poroma |                   |          |         |       |                |

### Benign Melanocytic Lesions

We would like to identify additional diagnoses (based on comments submitted by panelists in the "Diagnoses - Round 1" survey) that should be included in the dermoscopy core competency for dermatology residents. Please rate how strongly you would agree or disagree.

|            | Strongly Disagree | Disagree | Neutral | Agree | Strongly Agree |
|------------|-------------------|----------|---------|-------|----------------|
| Halo nevus |                   |          |         |       |                |

### Melanoma

We would like to identify additional diagnoses (based on comments submitted by panelists in the "Diagnoses - Round 1" survey) that should be included in the dermoscopy core competency for dermatology residents. Please rate how strongly you would agree or disagree.

|                                  | Strongly Disagree | Disagree | Neutral | Agree | Strongly Agree |
|----------------------------------|-------------------|----------|---------|-------|----------------|
| Amelanotic melanoma              |                   |          |         |       |                |
| Nevoid melanoma                  |                   |          |         |       |                |
| Desmoplastic melanoma            |                   |          |         |       |                |
| Melanoma arising withing a nevus |                   |          |         |       |                |

### Special Sites

We would like to identify additional special sites (based on comments submitted by panelists in the "Diagnoses - Round 1" survey) that should be included in the dermoscopy core competency for dermatology residents. Please rate how strongly you would agree or disagree.

|                                                | Strongly Disagree | Disagree | Neutral | Agree | Strongly Agree |
|------------------------------------------------|-------------------|----------|---------|-------|----------------|
| Trichoscopy (dermoscopy of the hair and scalp) |                   |          |         |       |                |
| Dermoscopy of the nails                        |                   |          |         |       |                |
| Dermoscopy of mucosal surfaces                 |                   |          |         |       |                |

**Trichoscopy (dermoscopy of the hair and scalp)**

If this category is included as a special site, please rate how strongly you agree or disagree that the following common diagnoses of the hair and scalp should be included in the dermoscopy core competency for dermatology residents.

|                             | Strongly Disagree | Disagree | Neutral | Agree | Strongly Agree |
|-----------------------------|-------------------|----------|---------|-------|----------------|
| Androgenetic alopecia       |                   |          |         |       |                |
| Alopecia areata             |                   |          |         |       |                |
| Discoid lupus erythematosus |                   |          |         |       |                |
| Lichen planopilaris         |                   |          |         |       |                |

**Dermoscopy of nails**

If this category is included as a special site, please rate how strongly you agree or disagree that the following common diagnoses of the nails should be included in the dermoscopy core competency for dermatology residents.

|                      | Strongly Disagree | Disagree | Neutral | Agree | Strongly Agree |
|----------------------|-------------------|----------|---------|-------|----------------|
| Lentigo of the nail  |                   |          |         |       |                |
| Nevus of the nail    |                   |          |         |       |                |
| Melanoma of the nail |                   |          |         |       |                |
| Subungual hemorrhage |                   |          |         |       |                |
| Onychomatricoma      |                   |          |         |       |                |
| Onychopapilloma      |                   |          |         |       |                |

**Dermoscopy of mucosal surfaces**

If this category is included as a special site, please rate how strongly you agree or disagree that the following common diagnoses of mucosal surfaces should be included in the dermoscopy core competency for dermatology residents.

|                                          | Strongly Disagree | Disagree | Neutral | Agree | Strongly Agree |
|------------------------------------------|-------------------|----------|---------|-------|----------------|
| Labial melanotic macule / labial lentigo |                   |          |         |       |                |
| Melanoma of a mucosal surface            |                   |          |         |       |                |

**Other**

Suggestions from panelist comments in the "Diagnoses - Round 1" survey for additional diagnoses to be included in the dermoscopy curriculum for dermatology residents which did not fall within our previously designated categories are presented here. Please rate how strongly you would agree or disagree.

|  | Strongly Disagree | Disagree | Neutral | Agree | Strongly Agree |
|--|-------------------|----------|---------|-------|----------------|
|  |                   |          |         |       |                |

|                       |  |  |  |  |  |
|-----------------------|--|--|--|--|--|
| Psoriasis             |  |  |  |  |  |
| Lichen planus         |  |  |  |  |  |
| Vasculitis            |  |  |  |  |  |
| Scabies               |  |  |  |  |  |
| Merkel cell carcinoma |  |  |  |  |  |

Please include any additional comments here \_\_\_\_\_

**DERMOSCOPIC FEATURES: ROUND 1**

We would like to identify structures that should be included in the dermoscopy core competency for dermatology residents for each of the following diagnoses. Please rate how strongly you would agree or disagree.

**NONMELANOCYTIC LESIONS**

**Basal cell carcinoma**

|                                                         | Strongly Disagree | Disagree | Neutral | Agree | Strongly Agree |
|---------------------------------------------------------|-------------------|----------|---------|-------|----------------|
| Leaf-like structures                                    |                   |          |         |       |                |
| Blue-gray ovoid nests                                   |                   |          |         |       |                |
| Multiple blue-gray dots and globules (buckshot scatter) |                   |          |         |       |                |
| Spoke wheel-like structures / concentric structures     |                   |          |         |       |                |
| Ulceration / erosion                                    |                   |          |         |       |                |
| White shiny blotches and strands                        |                   |          |         |       |                |
| Arborizing blood vessels                                |                   |          |         |       |                |
| Rosette sign                                            |                   |          |         |       |                |

If you have any suggestions for additional structures that you feel should be included, please note here. \_\_\_\_\_

**Actinic Keratosis**

|                                                                              | Strongly Disagree | Disagree | Neutral | Agree | Strongly Agree |
|------------------------------------------------------------------------------|-------------------|----------|---------|-------|----------------|
| Strawberry pattern (pink-red pseudonetwork + fine, wavy vessels (straight or |                   |          |         |       |                |

|                                                                                                                                                               |  |  |  |  |  |
|---------------------------------------------------------------------------------------------------------------------------------------------------------------|--|--|--|--|--|
| coiled)<br>surrounding<br>hair follicles +<br>white circles<br>with central<br>yellow clod<br>(targetoid hair<br>follicles)                                   |  |  |  |  |  |
| <i>Multiple definitions of "strawberry pattern" exist in the literature. We found the definition encompassing the above features to be the most prevalent</i> |  |  |  |  |  |
| Rosette sign                                                                                                                                                  |  |  |  |  |  |
| Surface scale                                                                                                                                                 |  |  |  |  |  |

If you have any suggestions for additional structures that you feel should be included, please note here. \_\_\_\_\_

**Pigmented actinic keratosis**

|                                                                   | Strongly Disagree | Disagree | Neutral | Agree | Strongly Agree |
|-------------------------------------------------------------------|-------------------|----------|---------|-------|----------------|
| Gray dots                                                         |                   |          |         |       |                |
| Annular-granular pattern (gray dots around follicular openings)   |                   |          |         |       |                |
| Rhomboidal structures                                             |                   |          |         |       |                |
| White circles with central yellow clod (targetoid hair follicles) |                   |          |         |       |                |
| Rosette sign                                                      |                   |          |         |       |                |
| Gray-brown pseudonetwork                                          |                   |          |         |       |                |

If you have any suggestions for additional structures that you feel should be included, please note here. \_\_\_\_\_

**Bowen's disease (squamous cell carcinoma in situ)**

|                                                                | Strongly Disagree | Disagree | Neutral | Agree | Strongly Agree |
|----------------------------------------------------------------|-------------------|----------|---------|-------|----------------|
| Surface scale                                                  |                   |          |         |       |                |
| Peripheral brown/gray dots arranged linearly (pigmented SCCIS) |                   |          |         |       |                |
| Brown circles (pigmented SCCIS)                                |                   |          |         |       |                |
| Glomerular                                                     |                   |          |         |       |                |



|                        |  |  |  |  |  |
|------------------------|--|--|--|--|--|
| (coiled) blood vessels |  |  |  |  |  |
|------------------------|--|--|--|--|--|

If you have any suggestions for additional structures that you feel should be included, please note here. \_\_\_\_\_

**Keratoacanthoma**

|                                                                                        | Strongly Disagree | Disagree | Neutral | Agree | Strongly Agree |
|----------------------------------------------------------------------------------------|-------------------|----------|---------|-------|----------------|
| Central keratin mass                                                                   |                   |          |         |       |                |
| Hairpin (looped) or serpentine (linear-irregular) blood vessels with white-yellow halo |                   |          |         |       |                |

If you have any suggestions for additional structures that you feel should be included, please note here. \_\_\_\_\_

**Squamous cell carcinoma**

|                                            | Strongly Disagree | Disagree | Neutral | Agree | Strongly Agree |
|--------------------------------------------|-------------------|----------|---------|-------|----------------|
| Yellow keratin mass / scale-crust          |                   |          |         |       |                |
| Ulceration / blood spots / hemorrhage      |                   |          |         |       |                |
| White circles ("keratin pearls")           |                   |          |         |       |                |
| Rosette sign                               |                   |          |         |       |                |
| Glomerular (coiled) blood vessels          |                   |          |         |       |                |
| Hairpin vessels, usually with whitish halo |                   |          |         |       |                |

If you have any suggestions for additional structures that you feel should be included, please note here. \_\_\_\_\_

**Solar lentigo**

|                                         | Strongly Disagree | Disagree | Neutral | Agree | Strongly Agree |
|-----------------------------------------|-------------------|----------|---------|-------|----------------|
| Moth-eaten (sharply demarcated) borders |                   |          |         |       |                |
| Homogenous                              |                   |          |         |       |                |

|                             |  |  |  |  |  |
|-----------------------------|--|--|--|--|--|
| light brown pigmentation    |  |  |  |  |  |
| Network-like structures     |  |  |  |  |  |
| Fingerprint-like structures |  |  |  |  |  |

If you have any suggestions for additional structures that you feel should be included, please note here. \_\_\_\_\_

**Simple lentigo (lentigo simplex)**

|                                        | Strongly Disagree | Disagree | Neutral | Agree | Strongly Agree |
|----------------------------------------|-------------------|----------|---------|-------|----------------|
| Symmetric with uniform pigment network |                   |          |         |       |                |

If you have any suggestions for additional structures that you feel should be included, please note here. \_\_\_\_\_

**Seborrheic keratosis**

|                                                              | Strongly Disagree | Disagree | Neutral | Agree | Strongly Agree |
|--------------------------------------------------------------|-------------------|----------|---------|-------|----------------|
| Milia-like cysts                                             |                   |          |         |       |                |
| Comedo-like openings                                         |                   |          |         |       |                |
| Moth-eaten (sharply demarcated) borders                      |                   |          |         |       |                |
| Network-like structures                                      |                   |          |         |       |                |
| "Fissures and ridges" / hyri and sulci / cerebriform pattern |                   |          |         |       |                |
| Fat fingers                                                  |                   |          |         |       |                |
| Fingerprint-like structures                                  |                   |          |         |       |                |
| Hairpin (looped) vessels, usually with whitish halo          |                   |          |         |       |                |

If you have any suggestions for additional structures that you feel should be included, please note here. \_\_\_\_\_

**Lichen planus-like keratosis / Benign lichenoid keratosis**

|             | Strongly Disagree | Disagree | Neutral | Agree | Strongly Agree |
|-------------|-------------------|----------|---------|-------|----------------|
| Coarse gray |                   |          |         |       |                |

|                                           |  |  |  |  |  |
|-------------------------------------------|--|--|--|--|--|
| granularity                               |  |  |  |  |  |
| Peppering<br>(evenly spaced<br>gray dots) |  |  |  |  |  |

If you have any suggestions for additional structures that you feel should be included, please note here. \_\_\_\_\_

### Hemangioma / angioma

|                                                              | Strongly Disagree | Disagree | Neutral | Agree | Strongly Agree |
|--------------------------------------------------------------|-------------------|----------|---------|-------|----------------|
| Red, blue-red, or maroon lacunae / lagoons with white septae |                   |          |         |       |                |
| Blue-black coloring (when thrombosed)                        |                   |          |         |       |                |

If you have any suggestions for additional structures that you feel should be included, please note here. \_\_\_\_\_

### Angiokeratoma

|                                       | Strongly Disagree | Disagree | Neutral | Agree | Strongly Agree |
|---------------------------------------|-------------------|----------|---------|-------|----------------|
| Red / purple / black ("dark") lacunae |                   |          |         |       |                |
| Hemorrhagic crust                     |                   |          |         |       |                |
| Whitish veil                          |                   |          |         |       |                |

If you have any suggestions for additional structures that you feel should be included, please note here. \_\_\_\_\_

### Dermatofibroma

|                                                                                 | Strongly Disagree | Disagree | Neutral | Agree | Strongly Agree |
|---------------------------------------------------------------------------------|-------------------|----------|---------|-------|----------------|
| Central scar-like white patch with delicate surrounding network-like structures |                   |          |         |       |                |
| Ring-like globules                                                              |                   |          |         |       |                |
| Central shiny white lines (crystalline structures)                              |                   |          |         |       |                |

If you have any suggestions for additional structures that you feel should be included, please note here. \_\_\_\_\_

**Clear cell acanthoma**

|                                                     | Strongly Disagree | Disagree | Neutral | Agree | Strongly Agree |
|-----------------------------------------------------|-------------------|----------|---------|-------|----------------|
| String of pearls (serpiginous) blood vessel pattern |                   |          |         |       |                |

If you have any suggestions for additional structures that you feel should be included, please note here. \_\_\_\_\_

**Sebaceous hyperplasia**

|                                                         | Strongly Disagree | Disagree | Neutral | Agree | Strongly Agree |
|---------------------------------------------------------|-------------------|----------|---------|-------|----------------|
| Pale yellow lobules around a central follicular opening |                   |          |         |       |                |
| Crown vessels                                           |                   |          |         |       |                |

If you have any suggestions for additional structures that you feel should be included, please note here. \_\_\_\_\_

**MELANOCYTIC LESIONS**

**Overview of benign nevi patterns**

|                                                             | Strongly Disagree | Disagree | Neutral | Agree | Strongly Agree |
|-------------------------------------------------------------|-------------------|----------|---------|-------|----------------|
| Diffuse reticular network                                   |                   |          |         |       |                |
| Patchy reticular network                                    |                   |          |         |       |                |
| Peripheral reticular network with central hypopigmentation  |                   |          |         |       |                |
| Peripheral reticular network with central hyperpigmentation |                   |          |         |       |                |
| Peripheral reticular network with central globules          |                   |          |         |       |                |
| Homogenous (tan, brown, blue, or pink)                      |                   |          |         |       |                |
| Central network with evenly distributed                     |                   |          |         |       |                |

|                                   |  |  |  |  |  |
|-----------------------------------|--|--|--|--|--|
| peripheral globules               |  |  |  |  |  |
| Globular pattern                  |  |  |  |  |  |
| Two-component pattern             |  |  |  |  |  |
| Symmetric multi-component pattern |  |  |  |  |  |

If you have any suggestions for additional structures that you feel should be included, please note here. \_\_\_\_\_

### **Congenital melanocytic nevi**

|                                                                                       | Strongly Disagree | Disagree | Neutral | Agree | Strongly Agree |
|---------------------------------------------------------------------------------------|-------------------|----------|---------|-------|----------------|
| Cobblestone pattern / globular pattern                                                |                   |          |         |       |                |
| Reticular network                                                                     |                   |          |         |       |                |
| Diffuse background pigmentation                                                       |                   |          |         |       |                |
| Hypertrichosis                                                                        |                   |          |         |       |                |
| Target network / target-like structures (globules or vessels within holes of network) |                   |          |         |       |                |
| Perifollicular hyper/hypopigmentation                                                 |                   |          |         |       |                |

If you have any suggestions for additional structures that you feel should be included, please note here. \_\_\_\_\_

### **Intradermal nevi**

|                                     | Strongly Disagree | Disagree | Neutral | Agree | Strongly Agree |
|-------------------------------------|-------------------|----------|---------|-------|----------------|
| Comma-shaped (curved) blood vessels |                   |          |         |       |                |

If you have any suggestions for additional structures that you feel should be included, please note here. \_\_\_\_\_

### **Blue nevi**

|                              | Strongly Disagree | Disagree | Neutral | Agree | Strongly Agree |
|------------------------------|-------------------|----------|---------|-------|----------------|
| Homogenous blue pigmentation |                   |          |         |       |                |

If you have any suggestions for additional structures that you feel should be included, please note here. \_\_\_\_\_

### **Spitz nevi**

|  | Strongly Disagree | Disagree | Neutral | Agree | Strongly Agree |
|--|-------------------|----------|---------|-------|----------------|
|  |                   |          |         |       |                |

|                                                                       |  |  |  |  |  |
|-----------------------------------------------------------------------|--|--|--|--|--|
| Vascular pattern (pink homogenous pattern with dotted vessels)        |  |  |  |  |  |
| Globular pattern                                                      |  |  |  |  |  |
| Starburst pattern (with tiered globules / streaks) (radial streaming) |  |  |  |  |  |
| Reticular pattern                                                     |  |  |  |  |  |
| Atypical pattern                                                      |  |  |  |  |  |
| Homogenous (pigmented pattern)                                        |  |  |  |  |  |
| Negative network (reticular depigmentation)                           |  |  |  |  |  |
| White shiny lines (crystalline structures)                            |  |  |  |  |  |

If you have any suggestions for additional structures that you feel should be included, please note here. \_\_\_\_\_

### Recurrent (persistent) nevi

|                                               | Strongly Disagree | Disagree | Neutral | Agree | Strongly Agree |
|-----------------------------------------------|-------------------|----------|---------|-------|----------------|
| Pigment within the scar, not extending beyond |                   |          |         |       |                |

If you have any suggestions for additional structures that you feel should be included, please note here. \_\_\_\_\_

## MELANOMA

### Melanoma (overview of features)

|                                                         | Strongly Disagree | Disagree | Neutral | Agree | Strongly Agree |
|---------------------------------------------------------|-------------------|----------|---------|-------|----------------|
| Atypical pigment network                                |                   |          |         |       |                |
| Blue structures (blue-white veil, blue-gray structures) |                   |          |         |       |                |
| White shiny lines                                       |                   |          |         |       |                |

|                                                                             |  |  |  |  |  |
|-----------------------------------------------------------------------------|--|--|--|--|--|
| (crystalline structures)                                                    |  |  |  |  |  |
| Negative network                                                            |  |  |  |  |  |
| Irregular dots / globules                                                   |  |  |  |  |  |
| Irregular streaks (radial streaming, pseudopods)                            |  |  |  |  |  |
| Regression structures (white scar-like area with peppering)                 |  |  |  |  |  |
| Peripheral brown structureless area                                         |  |  |  |  |  |
| Angulated lines (extrafacial)                                               |  |  |  |  |  |
| Atypical vascular pattern, polymorphous vessels (2+ types of blood vessels) |  |  |  |  |  |
| Atypical blotch                                                             |  |  |  |  |  |

If you have any suggestions for additional structures that you feel should be included, please note here. \_\_\_\_\_

**Acral lentiginous melanoma**

|                                | Strongly Disagree | Disagree | Neutral | Agree | Strongly Agree |
|--------------------------------|-------------------|----------|---------|-------|----------------|
| Parallel ridge pattern         |                   |          |         |       |                |
| Irregular diffuse pigmentation |                   |          |         |       |                |
| Multicomponent Pattern         |                   |          |         |       |                |
| Atypical fibrillar pattern     |                   |          |         |       |                |

If you have any suggestions for additional structures that you feel should be included, please note here. \_\_\_\_\_

**Lentigo maligna melanoma (melanoma on chronically sun-damaged skin of the head / neck)**

|          | Strongly Disagree | Disagree | Neutral | Agree | Strongly Agree |
|----------|-------------------|----------|---------|-------|----------------|
| Annular- |                   |          |         |       |                |

|                                                          |  |  |  |  |  |
|----------------------------------------------------------|--|--|--|--|--|
| granular pattern (gray dots around follicular openings)  |  |  |  |  |  |
| Asymmetric pigmentation around follicular openings       |  |  |  |  |  |
| Rhomboidal structures                                    |  |  |  |  |  |
| Target pattern (circle within a circle) (isobar)         |  |  |  |  |  |
| Dark blotches with or without obliterated hair follicles |  |  |  |  |  |

If you have any suggestions for additional structures that you feel should be included, please note here. \_\_\_\_\_

**Amelanotic melanoma**

|                                                                             | Strongly Disagree | Disagree | Neutral | Agree | Strongly Agree |
|-----------------------------------------------------------------------------|-------------------|----------|---------|-------|----------------|
| Scar-like depigmentation                                                    |                   |          |         |       |                |
| Milky red areas                                                             |                   |          |         |       |                |
| White shiny lines (crystalline structures)                                  |                   |          |         |       |                |
| Atypical vascular pattern, polymorphous vessels (2+ types of blood vessels) |                   |          |         |       |                |

If you have any suggestions for additional structures that you feel should be included, please note here. \_\_\_\_\_

**Melanoma arising within a nevus**

|                                                            | Strongly Disagree | Disagree | Neutral | Agree | Strongly Agree |
|------------------------------------------------------------|-------------------|----------|---------|-------|----------------|
| Structures as listed in "overview of benign nevi patterns" |                   |          |         |       |                |
| Structures as listed in                                    |                   |          |         |       |                |



|                                   |  |  |  |  |  |
|-----------------------------------|--|--|--|--|--|
| "melanoma (overview of features)" |  |  |  |  |  |
| Negative network                  |  |  |  |  |  |

If you have any suggestions for additional structures that you feel should be included, please note here.

Please also provide a brief description of why you believe that this structure should be presented to panelists for inclusion as a basic competency in characterization of this diagnosis (i.e. highly specific, very commonly encountered in clinical practice, etc.)

### SPECIAL SITES / OTHER

#### Dermoscopic features of the face

|                       | Strongly Disagree | Disagree | Neutral | Agree | Strongly Agree |
|-----------------------|-------------------|----------|---------|-------|----------------|
| Pseudonetwork pattern |                   |          |         |       |                |

If you have any suggestions for additional structures that you feel should be included, please note here. \_\_\_\_\_

#### Acral dermoscopy: Benign patterns of acral nevi

|                                                                                | Strongly Disagree | Disagree | Neutral | Agree | Strongly Agree |
|--------------------------------------------------------------------------------|-------------------|----------|---------|-------|----------------|
| Parallel furrow pattern                                                        |                   |          |         |       |                |
| Lattice-like pattern                                                           |                   |          |         |       |                |
| Fibrillar pattern (soles only)                                                 |                   |          |         |       |                |
| Homogenous pattern                                                             |                   |          |         |       |                |
| Peas in a pod pattern (parallel furrow + globules on ridges) (congenital nevi) |                   |          |         |       |                |

If you have any suggestions for additional structures that you feel should be included, please note here. \_\_\_\_\_

### DERMOSCOPY OF NAILS

#### Nevus of the nail

|                  | Strongly Disagree | Disagree | Neutral | Agree | Strongly Agree |
|------------------|-------------------|----------|---------|-------|----------------|
| Homogenous brown |                   |          |         |       |                |

|                                                                             |  |  |  |  |  |
|-----------------------------------------------------------------------------|--|--|--|--|--|
| background coloration                                                       |  |  |  |  |  |
| Uniform band thickness, color, and spacing with parallel band configuration |  |  |  |  |  |

If you have any suggestions for additional structures that you feel should be included, please note here. \_\_\_\_\_

**Lentigo of the nail (melanotic macule of the nail)**

|                                                         | Strongly Disagree | Disagree | Neutral | Agree | Strongly Agree |
|---------------------------------------------------------|-------------------|----------|---------|-------|----------------|
| Multiple thin homogenous gray lines +/- gray background |                   |          |         |       |                |

If you have any suggestions for additional structures that you feel should be included, please note here. \_\_\_\_\_

**Melanoma of the nail**

|                                                                                          | Strongly Disagree | Disagree | Neutral | Agree | Strongly Agree |
|------------------------------------------------------------------------------------------|-------------------|----------|---------|-------|----------------|
| Triangular shape of pigment band (band diameter wider at proximal end)                   |                   |          |         |       |                |
| Pigmentation of periungual skin (micro-Hutchinson's sign)                                |                   |          |         |       |                |
| Brown to black dots/globules associated with longitudinal lines                          |                   |          |         |       |                |
| Longitudinal brown/black lines with irregular spacing, width, coloration, or parallelism |                   |          |         |       |                |

If you have any suggestions for additional structures that you feel should be included, please note here. \_\_\_\_\_

**Subungual Hemorrhage**

|                                                                   | Strongly Disagree | Disagree | Neutral | Agree | Strongly Agree |
|-------------------------------------------------------------------|-------------------|----------|---------|-------|----------------|
| Well circumscribed red-black dots or blotches                     |                   |          |         |       |                |
| Distal streaks of red-brown coloration ("filamentous" distal end) |                   |          |         |       |                |
| Homogenous red/purple/black coloration without melanin granules   |                   |          |         |       |                |

If you have any suggestions for additional structures that you feel should be included, please note here. \_\_\_\_\_

**OTHER**

**Scabies**

|                                                                                                                                        | Strongly Disagree | Disagree | Neutral | Agree | Strongly Agree |
|----------------------------------------------------------------------------------------------------------------------------------------|-------------------|----------|---------|-------|----------------|
| Delta-wing jet with contrail sign (small dark brown triangular structure located at the end of whitish structureless curved/wavy lines |                   |          |         |       |                |

If you have any suggestions for additional structures that you feel should be included, please note here. \_\_\_\_\_

**ADDITIONAL DIAGNOSES**

We also present here one potential additional diagnosis based on a panelist suggestion in the Diagnoses round 2 survey. Please rate how strongly you would agree or disagree on the inclusion of the following diagnosis as a core competency:

|              | Strongly Disagree | Disagree | Neutral | Agree | Strongly Agree |
|--------------|-------------------|----------|---------|-------|----------------|
| Angiosarcoma |                   |          |         |       |                |

**If the diagnosis angiosarcoma reaches consensus for addition, please rate how strongly you would agree or disagree for the inclusion of the following associated structures:**

|  | Strongly Disagree | Disagree | Neutral | Agree | Strongly Agree |
|--|-------------------|----------|---------|-------|----------------|
|  |                   |          |         |       |                |

|                                                                                                           |  |  |  |  |  |
|-----------------------------------------------------------------------------------------------------------|--|--|--|--|--|
| Homogenous pattern with combinations of patterns (i.e., whitish, pinkish, reddish, bluish, or violaceous) |  |  |  |  |  |
| Central whitish veil areas / skin-colored areas                                                           |  |  |  |  |  |
| Absence of well-defined vascular structures (i.e. lacunes, vessels)                                       |  |  |  |  |  |

If you have any suggestions for additional structures that you feel should be included, please note here. \_\_\_\_\_

If you have any additional comments about the survey overall, please note here:

\_\_\_\_\_

## DERMOSCOPIC FEATURES: ROUND 2

### NONMELANOCYTIC LESIONS

To ensure agreement on included structures, we have provided the percentage of panelists who voted "agree" or "strongly agree" in the 'Structures - Round 1' survey. Structures are listed in order of percent preliminary consensus.

Structures with < 70% positive votes did not reach consensus in round 1.

Please confirm your vote to finalize the decision on inclusion / exclusion of each structure.

#### Basal cell carcinoma

|                                                               | No, do NOT include this structure | YES, include this structure |
|---------------------------------------------------------------|-----------------------------------|-----------------------------|
| Leaf-like structures (96%)                                    |                                   |                             |
| Blue-gray ovoid nests (100%)                                  |                                   |                             |
| Multiple blue-gray dots and globules (buckshot scatter) (88%) |                                   |                             |
| Spoke wheel-like structures                                   |                                   |                             |

|                                        |  |  |
|----------------------------------------|--|--|
| / concentric structures (92%)          |  |  |
| Ulceration / erosion (88%)             |  |  |
| White shiny blotches and strands (85%) |  |  |
| Arborizing blood vessels (100%)        |  |  |
| Rosette sign (42%)                     |  |  |

**Basal cell carcinoma: Additional Structures**

Panelist suggestions for additional structures not provided in the 'Structures - Round 1' survey are presented here. Please rate how strongly you would agree / disagree with their inclusion.

|                                                                                 | Strongly Disagree | Disagree | Neutral | Agree | Strongly Agree |
|---------------------------------------------------------------------------------|-------------------|----------|---------|-------|----------------|
| Short fine telangiectasias (superficial BCC)                                    |                   |          |         |       |                |
| Shiny white to red structureless and milky pink areas (glass-like translucency) |                   |          |         |       |                |

**Actinic Keratosis**

|                                                                                                                                                                                                               | No, do NOT include this structure | YES, include this structure |
|---------------------------------------------------------------------------------------------------------------------------------------------------------------------------------------------------------------|-----------------------------------|-----------------------------|
| Strawberry pattern (pink-red pseudonetwork + fine, wavy vessels (straight or coiled) surrounding hair follicles + white circles with central yellow clod (targetoid hair follicles)) (85%)<br>(targetoid hair |                                   |                             |

|                        |  |  |
|------------------------|--|--|
| follicles)             |  |  |
| Rosette sign<br>(77%)  |  |  |
| Surface scale<br>(73%) |  |  |

**Actinic Keratosis: Alternate naming**

For the structure "Strawberry pattern" (85% positive votes), some panelists suggested alternate naming. Please select which naming you would prefer.

- 1: ORIGINAL: Strawberry pattern (pink-red pseudonetwork + fine, wavy vessels (straight or coiled) surrounding hair follicles + white circles with central yellow clod (targetoid hair follicles))
- 2: ALTERNATE: Strawberry pattern (pink-red pseudonetwork +/- fine, wavy vessels (straight or coiled) surrounding hair follicles +/- white circles with central yellow clod (targetoid hair follicles))

**Pigmented actinic keratosis**

|                                                                           | No, do NOT include this structure | YES, include this structure |
|---------------------------------------------------------------------------|-----------------------------------|-----------------------------|
| Rosette sign<br>(85%)                                                     |                                   |                             |
| Gray dots<br>(81%)                                                        |                                   |                             |
| Annular-granular pattern (gray dots around follicular openings)<br>(71%)  |                                   |                             |
| White circles with a central yellow clod (targetoid hair follicles) (69%) |                                   |                             |
| Rhomboidal structures<br>(62%)                                            |                                   |                             |
| Gray-brown pseudonetwork<br>(58%)                                         |                                   |                             |

**Pigmented Actinic Keratosis: Alternate naming**

The term "white circles with a central yellow clod (targetoid hair follicles)" closely did not reach consensus in round 1 (69.2% positive votes). However, multiple panelists wrote in comments suggesting a potentially overlapping structure: "patent follicles".

We would like to determine if panelists would prefer to combine both terms into a single structure, or if they consider the structures to be separate entities. Please choose which option you would prefer.

- 1: Keep "White circles with central yellow clod (targetoid hair follicles)" and "Patent follicles" as SEPARATE structures
- 2: COMBINE THE STRUCTURES INTO: "White circles with central yellow clod (targetoid hair follicles) (patent follicles)"

**Pigmented Actinic Keratosis: Additional Structures**

Panelist suggestions for additional structures not provided in the 'Structures - Round 1' survey are presented here. Please rate how strongly you would agree / disagree with their inclusion.

|                   | Strongly Disagree | Disagree | Neutral | Agree | Strongly Agree |
|-------------------|-------------------|----------|---------|-------|----------------|
| Surface scale     |                   |          |         |       |                |
| Moth-eaten border |                   |          |         |       |                |
| Patent follicles  |                   |          |         |       |                |

**Bowen's disease (squamous cell carcinoma in situ)**

|                                                                      | No, do NOT include this structure | YES, include this structure | Neutral | Agree | Strongly Agree |
|----------------------------------------------------------------------|-----------------------------------|-----------------------------|---------|-------|----------------|
| Glomerular (coiled) blood vessels (96%)                              |                                   |                             |         |       |                |
| Surface scale (81%)                                                  |                                   |                             |         |       |                |
| Peripheral brown/gray dots arranged linearly (pigmented SCCIS) (77%) |                                   |                             |         |       |                |
| Brown circles (pigmented SCCIS) (54%)                                |                                   |                             |         |       |                |

**Bowen's disease: Alternate naming**

For the structure "Glomerular (coiled) blood vessels" (96% positive votes), some panelists suggested alternate naming. Please select which option you would prefer.

- 1: ORIGINAL: Glomerular (coiled) blood vessels
- 2: ALTERNATE: Glomerular (coiled) / dotted blood vessels

**Keratoacanthoma**

|                                                                                              | No, do NOT include this structure | YES, include this structure |
|----------------------------------------------------------------------------------------------|-----------------------------------|-----------------------------|
| Hairpin (looped) or serpentine (linear-irregular) blood vessels with white-yellow halo (96%) |                                   |                             |
| Central keratin mass (92%)                                                                   |                                   |                             |

**Keratoacanthoma: Alternate naming**

For the structure "Hairpin (looped) or serpentine (linear-irregular) blood vessels with white-yellow halo" (96% positive votes), some panelists suggested alternate naming. Please select which option you would prefer.

- 1, ORIGINAL: Hairpin (looped) or serpentine (linear-irregular) blood vessels with white-yellow halo
- 2, ALTERNATE: Hairpin (looped) or serpentine (linear-irregular) blood vessels, usually at the periphery, with white-yellow halo

**Squamous cell carcinoma**

|                                                  | No, do NOT include this structure | YES, include this structure |
|--------------------------------------------------|-----------------------------------|-----------------------------|
| Hairpin vessels, usually with whitish halo (92%) |                                   |                             |
| Glomerular (coiled) blood vessels (88%)          |                                   |                             |
| Yellow keratin mass/scale-crust (85%)            |                                   |                             |
| White circles ("keratin pearls") (85%)           |                                   |                             |
| Rosette sign (81%)                               |                                   |                             |
| Ulceration / blood spots / hemorrhage (77%)      |                                   |                             |

**Squamous cell carcinoma: Alternate naming**

For the structure "Ulceration / blood spots / hemorrhage" (77% positive votes), multiple panelists commented that blood spots / hemorrhage should be separate from ulceration. Please select which option you would prefer.

- 1, KEEP ORIGINAL: "Ulceration / blood spots / hemorrhage"
- 2, Both "Blood spots / hemorrhage" AND "Ulceration" should be included as SEPARATE structures
- 3, " Blood spots / hemorrhage" ONLY should be included a separate structure
- 4, "Ulceration" ONLY should be included as a separate structure
- 5, I do NOT think ANY of these should in included as structures

**Squamous cell carcinoma: Additional Structures**

Panelist suggestions for additional structures not provided in the 'Structures - Round 1' survey are presented here. Please rate how strongly you would agree / disagree with their inclusion.

|  | Strongly Disagree | Disagree | Neutral | Agree | Strongly Agree |
|--|-------------------|----------|---------|-------|----------------|
|  |                   |          |         |       |                |



|                                             |  |  |  |  |  |
|---------------------------------------------|--|--|--|--|--|
| Polymorphic blood vessel morphology         |  |  |  |  |  |
| Linear irregular (serpentine) blood vessels |  |  |  |  |  |

**Solar lentigo**

|                                                | No, do NOT include this structure | YES, include this structure | Neutral | Agree | Strongly Agree |
|------------------------------------------------|-----------------------------------|-----------------------------|---------|-------|----------------|
| Moth-eaten (sharply demarcated) borders (100%) |                                   |                             |         |       |                |
| Homogenous light brown pigmentation (92%)      |                                   |                             |         |       |                |
| Network-like structures (77%)                  |                                   |                             |         |       |                |
| Fingerprint-like structures (96%)              |                                   |                             |         |       |                |

**Solar lentigo: Alternate naming**

For the structure "Fingerprint-like structures" (96% positive votes), some panelists suggested alternate naming. Please select which option you would prefer.

- 1, ORIGINAL: Fingerprint-like structures
- 2, ALTERNATE: Fingerprint-like structures (parallel lines)

**Simple lentigo (lentigo simplex)**

|                                              | No, do NOT include this structure | YES, include this structure |
|----------------------------------------------|-----------------------------------|-----------------------------|
| Symmetric with uniform pigment network (88%) |                                   |                             |

**Seborrheic keratosis**

|                             | No, do NOT include this structure | YES, include this structure |
|-----------------------------|-----------------------------------|-----------------------------|
| Milia-like cysts (100%)     |                                   |                             |
| Comedo-like openings (100%) |                                   |                             |

|                                                                    |  |  |
|--------------------------------------------------------------------|--|--|
| Hairpin (looped) vessels, usually with whitish halo (96%)          |  |  |
| "Fissures and ridges" / gyri and sulci / cerebriform pattern (96%) |  |  |
| Moth-eaten (sharply demarcated) borders (85%)                      |  |  |
| Fat-fingers (92%)                                                  |  |  |
| Fingerprint-like structures (85%)                                  |  |  |
| Network-like structures (62%)                                      |  |  |

**Lichen planus-like keratosis / Benign lichenoid keratosis**

|                                           |                                   |                             |
|-------------------------------------------|-----------------------------------|-----------------------------|
|                                           | No, do NOT include this structure | YES, include this structure |
| Coarse gray granularity (92%)             |                                   |                             |
| Peppering (evenly spaced gray dots) (92%) |                                   |                             |

**Lichen planus-like keratosis / benign lichenoid keratosis: Additional Structures**

Panelist suggestions for additional structures not provided in the 'Structures - Round 1' survey are presented here. Please rate how strongly you would agree / disagree with their inclusion.

|                                                 | Strongly Disagree | Disagree | Neutral | Agree | Strongly Agree |
|-------------------------------------------------|-------------------|----------|---------|-------|----------------|
| Sharp, cut off borders (scalloped / moth-eaten) |                   |          |         |       |                |
| Pinpoint / dotted blood vessels                 |                   |          |         |       |                |
| Pigment network remnant                         |                   |          |         |       |                |

### Hemangioma / angioma

|                                                                     | No, do NOT include this structure | YES, include this structure |
|---------------------------------------------------------------------|-----------------------------------|-----------------------------|
| Red, blue-red, or maroon lacunae / lagoons with white septae (100%) |                                   |                             |
| Blue-black coloring (when thrombosed) (100%)                        |                                   |                             |

### Angiokeratoma

|                                              | No, do NOT include this structure | YES, include this structure |
|----------------------------------------------|-----------------------------------|-----------------------------|
| Red / purple / black ("dark") lacunae (100%) |                                   |                             |
| Hemorrhagic crust (88%)                      |                                   |                             |
| Whitish veil (62%)                           |                                   |                             |

### Dermatofibroma

|                                                                                        | No, do NOT include this structure | YES, include this structure |
|----------------------------------------------------------------------------------------|-----------------------------------|-----------------------------|
| Central scar-like white patch with delicate surrounding network-like structures (100%) |                                   |                             |
| Ring-like globules (81%)                                                               |                                   |                             |
| Central shiny white lines (crystalline structures) (96%)                               |                                   |                             |

### Dermatofibroma: Additional Structures

Panelist suggestions for additional structures not provided in the 'Structures - Round 1' survey are presented here. Please rate how strongly you would agree / disagree with their inclusion.

|  | Strongly | Disagree | Neutral | Agree | Strongly Agree |
|--|----------|----------|---------|-------|----------------|
|  |          |          |         |       |                |

|                                                                   |          |  |  |  |  |
|-------------------------------------------------------------------|----------|--|--|--|--|
|                                                                   | Disagree |  |  |  |  |
| Vascular structures (vascular blush) within scar-like white patch |          |  |  |  |  |

### Clear cell acanthoma

|                                                            | No, do NOT include this structure | YES, include this structure |
|------------------------------------------------------------|-----------------------------------|-----------------------------|
| String of pearls (serpiginous) blood vessel pattern (100%) |                                   |                             |

### Sebaceous hyperplasia

|                                                                | No, do NOT include this structure | YES, include this structure |
|----------------------------------------------------------------|-----------------------------------|-----------------------------|
| Pale yellow lobules around a central follicular opening (100%) |                                   |                             |
| Crown vessels (100%)                                           |                                   |                             |

## MELANOCYtic LESIONS

### Overview of benign nevi patterns

|                                                                   | No, do NOT include this structure | YES, include this structure |
|-------------------------------------------------------------------|-----------------------------------|-----------------------------|
| Diffuse reticular network (100%)                                  |                                   |                             |
| Patchy reticular network (100%)                                   |                                   |                             |
| Peripheral reticular network with central hypopigmentation (100%) |                                   |                             |
| Peripheral reticular network with central hyperpigmentation       |                                   |                             |

|                                                                    |  |  |
|--------------------------------------------------------------------|--|--|
| (100%)                                                             |  |  |
| Peripheral reticular network with central globules (100%)          |  |  |
| Homogenous (tan, brown, blue, or pink) (96%)                       |  |  |
| Central network with evenly distributed peripheral globules (100%) |  |  |
| Globular pattern (100%)                                            |  |  |
| Two-component pattern (92%)                                        |  |  |
| Symmetric multi-component pattern (85%)                            |  |  |

### Congenital melanocytic nevi

|                                                                                             | No, do NOT include this structure | YES, include this structure |
|---------------------------------------------------------------------------------------------|-----------------------------------|-----------------------------|
| Cobblestone pattern / globular pattern (100%)                                               |                                   |                             |
| Reticular network (100%)                                                                    |                                   |                             |
| Diffuse background pigmentation (92%)                                                       |                                   |                             |
| Hypertrichosis (81%)                                                                        |                                   |                             |
| Target network / target-like structures (globules or vessels within holes of network) (65%) |                                   |                             |
| Perifollicular hyper/hypopigmentation (88%)                                                 |                                   |                             |

### Congenital melanocytic nevi: Additional Structures

Panelist suggestions for additional structures not provided in the 'Structures - Round 1' survey are presented here. Please rate how strongly you would agree / disagree with their inclusion.

|                   | Strongly Disagree | Disagree | Neutral | Agree | Strongly Agree |
|-------------------|-------------------|----------|---------|-------|----------------|
| Pigment dropout   |                   |          |         |       |                |
| Keratin retention |                   |          |         |       |                |

### Intradermal nevi

|                                            | No, do NOT include this structure | YES, include this structure |
|--------------------------------------------|-----------------------------------|-----------------------------|
| Comma-shaped (curved) blood vessels (100%) |                                   |                             |

### **Intradermal Nevi: Additional Structures**

Panelist suggestions for additional structures not provided in the 'Structures - Round 1' survey are presented here. Please rate how strongly you would agree / disagree with their inclusion.

|                                                   | Strongly Disagree | Disagree | Neutral | Agree | Strongly Agree |
|---------------------------------------------------|-------------------|----------|---------|-------|----------------|
| Homogenous (structureless) brown/tan pigmentation |                   |          |         |       |                |

### **Blue nevi**

|                                     | No, do NOT include this structure | YES, include this structure |
|-------------------------------------|-----------------------------------|-----------------------------|
| Homogenous blue pigmentation (100%) |                                   |                             |

### **Spitz nevi**

|                                                                              | No, do NOT include this structure | YES, include this structure |
|------------------------------------------------------------------------------|-----------------------------------|-----------------------------|
| Vascular pattern (pink homogenous pattern with dotted vessels) (96%)         |                                   |                             |
| Globular pattern (77%)                                                       |                                   |                             |
| Starburst pattern (with tiered globules / streaks) (radial streaming) (100%) |                                   |                             |
| Reticular pattern (58%)                                                      |                                   |                             |
| Atypical pattern (58%)                                                       |                                   |                             |
| Homogenous (pigmented)                                                       |                                   |                             |

|                                                   |  |  |
|---------------------------------------------------|--|--|
| pattern) (46%)                                    |  |  |
| Negative network (reticular depigmentation) (88%) |  |  |
| White shiny lines (crystalline structures) (81%)  |  |  |

### Recurrent (persistent) nevi

|                                                     |                                   |                             |
|-----------------------------------------------------|-----------------------------------|-----------------------------|
|                                                     | No, do NOT include this structure | YES, include this structure |
| Pigment within the scar, not extending beyond (92%) |                                   |                             |

### Recurrent (Persistent) Nevi: Additional Structures

Panelist suggestions for additional structures not provided in the 'Structures - Round 1' survey are presented here. Please rate how strongly you would agree / disagree with their inclusion.

|                               |                   |          |         |       |                |
|-------------------------------|-------------------|----------|---------|-------|----------------|
|                               | Strongly Disagree | Disagree | Neutral | Agree | Strongly Agree |
| Uniformity of pigment network |                   |          |         |       |                |

## MELANOMA

### Melanoma (overview of features)

|                                                               |                                   |                             |
|---------------------------------------------------------------|-----------------------------------|-----------------------------|
|                                                               | No, do NOT include this structure | YES, include this structure |
| Atypical pigment network (100%)                               |                                   |                             |
| Blue structures (blue-white veil, blue-gray structures) (96%) |                                   |                             |
| White shiny lines (crystalline structures) (100%)             |                                   |                             |
| Negative network (100%)                                       |                                   |                             |

|                                                                                    |  |  |
|------------------------------------------------------------------------------------|--|--|
| Irregular dots / globules (100%)                                                   |  |  |
| Irregular streaks (radial streaming, pseudopods) (100%)                            |  |  |
| Regression structures (white scar-like area with peppering) (96%)                  |  |  |
| Peripheral brown structureless area (88%)                                          |  |  |
| Angulated lines (extrafacial) (85%)                                                |  |  |
| Atypical vascular pattern, polymorphous vessels (2+ types of blood vessels) (100%) |  |  |
| Atypical blotch (96%)                                                              |  |  |

**Melanoma: Alternate naming**

For the structure "Blue structures (blue-white veil, blue-gray structures)" (96% positive votes), some panelists commented that the term used was unclear. Our goal was to be inclusive of a wider range of structures by using a broad term. Please select which option you would prefer.

- 1, ORIGINAL: Blue structures (blue-white veil, blue-gray structures)
- 2, Make "Blue-gray structures" and "Blue-white veil" SEPARATE structures and include both
- 3, Change structure to "Blue-white veil" ONLY

**Melanoma: Alternate naming**

For the structure "Regression structures (white scar-like area with peppering)" (96% positive votes), some panelists suggested alternate naming. Please select which option you would prefer.

- 1, ORIGINAL: Regression structures (white scar-like area with peppering)
- 2, ALTERNATE: Regression structures (white scar-like area and/or peppering)

**Melanoma: Alternate naming**

For the structure "Atypical vascular pattern, polymorphous vessels (2+ types of blood vessels)" (100% positive votes), some panelists suggested alternate naming. Please select which naming



option you would prefer.

- 1, ORIGINAL: Atypical vascular pattern, polymorphous vessels (2+ types of blood vessels)
- 2, Atypical vascular pattern, polymorphous vessels (e.g. linear irregular and dotted vessels)
- 3, Atypical vascular pattern, polymorphous vessels (2+ types of blood vessels, e.g. linear irregular and dotted vessels)

**Melanoma: Additional Structures**

Panelist suggestions for additional structures not provided in the 'Structures - Round 1' survey are presented here. Please rate how strongly you would agree / disagree with their inclusion.

|                                | Strongly Disagree | Disagree | Neutral | Agree | Strongly Agree |
|--------------------------------|-------------------|----------|---------|-------|----------------|
| Multiple hyperpigmented areas  |                   |          |         |       |                |
| Asymmetry of border abruptness |                   |          |         |       |                |

**Acral lentiginous melanoma**

|                                      | No, do NOT include this structure | YES, include this structure |
|--------------------------------------|-----------------------------------|-----------------------------|
| Parallel ridge pattern (100%)        |                                   |                             |
| Irregular diffuse pigmentation (96%) |                                   |                             |
| Multicomponent Pattern (88%)         |                                   |                             |
| Atypical fibrillar pattern (88%)     |                                   |                             |

**Acral lentiginous melanoma: Alternate naming**

For the structures "Irregular diffuse pigmentation" (96% positive votes) and "Multicomponent pattern" (88% positive votes), some panelists suggested combining the two terms (Note: both individually reached consensus.) Please select which naming option you would prefer.

- 1, ORIGINAL: keep "Irregular diffuse pigmentation" and "Multicomponent pattern" as separate structures
- 2, ALTERNATE: combine as "Chaotic / asymmetric pattern (i.e irregular diffuse pigmentation, multicomponent pattern)"

**Lentigo maligna melanoma (melanoma on chronically sun-damaged skin of the head / neck)**

|                                                                        | No, do NOT include this structure | YES, include this structure |
|------------------------------------------------------------------------|-----------------------------------|-----------------------------|
| Annular-granular pattern (gray dots around follicular openings) (100%) |                                   |                             |

|                                                                 |  |  |
|-----------------------------------------------------------------|--|--|
| Asymmetric pigmentation around follicular openings (100%)       |  |  |
| Rhomboidal structures (96%)                                     |  |  |
| Target pattern (circle within a circle) (isobar) (85%)          |  |  |
| Dark blotches with or without obliterated hair follicles (100%) |  |  |

**Lentigo maligna melanoma: Alternate naming**

For the structure "Rhomboidal structures" (96% positive votes), some panelists suggested alternate naming. Please select which option you would prefer.

- 1, ORIGINAL: Rhomboidal structures
- 2, ALTERNATE: Rhomboidal structures (angulated lines)

**Amelanotic melanoma**

|                                                                                    | No, do NOT include this structure | YES, include this structure |
|------------------------------------------------------------------------------------|-----------------------------------|-----------------------------|
| Scar-like depigmentation (73%)                                                     |                                   |                             |
| Milky red areas (100%)                                                             |                                   |                             |
| White shiny lines (crystalline structures) (100%)                                  |                                   |                             |
| Atypical vascular pattern, polymorphous vessels (2+ types of blood vessels) (100%) |                                   |                             |

**Amelanotic melanoma: Alternate naming**

For the structure "Atypical vascular pattern, polymorphous vessels (2+ types of blood vessels)" (100% positive votes), some panelists suggested alternate naming. Please select which naming option you would prefer.

- 1, ORIGINAL: Atypical vascular pattern, polymorphous vessels (2+ types of blood vessels)
- 2, Atypical vascular pattern, polymorphous vessels (e.g. linear irregular and dotted vessels)
- 3, Atypical vascular pattern, polymorphous vessels (2+ types of blood vessels, e.g. linear irregular and dotted vessels)

**Melanoma Arising in a Nevus: Re-Evaluation of DIAGNOSIS**

This diagnosis was initially proposed via a write-in comment and reached consensus in Diagnoses: Round 2. However, during the structures surveys many panelists commented that they no longer believe this diagnosis should be included. As a result of this feedback, we would like to re-survey if you believe this DIAGNOSIS should be included as a core competency. Please indicate if you agree or disagree. Original percentage of panelists voting "agree" or "strongly agree" in the DIAGNOSES Round 2 survey is shown.

- 1, No, I do NOT agree with the inclusion of this diagnosis
- 2, Yes, I agree with the inclusion of this diagnosis

**Melanoma arising within a nevus (IF DIAGNOSIS IS KEPT)**

|                                                                  | No, do NOT include this structure | YES, include this structure |
|------------------------------------------------------------------|-----------------------------------|-----------------------------|
| Structures as listed in "overview of benign nevi patterns" (77%) |                                   |                             |
| Structures as listed in "melanoma (overview of features)" (77%)  |                                   |                             |
| Negative network (77%)                                           |                                   |                             |

**SPECIAL SITES / OTHER**

**Dermoscopic features of the face**

|                             | No, do NOT include this structure | YES, include this structure |
|-----------------------------|-----------------------------------|-----------------------------|
| Pseudonetwork pattern (92%) |                                   |                             |

**Acral dermoscopy: Benign patterns of acral nevi**

|                                | No, do NOT include this structure | YES, include this structure |
|--------------------------------|-----------------------------------|-----------------------------|
| Parallel furrow pattern (100%) |                                   |                             |
| Lattice-like pattern (100%)    |                                   |                             |
| Fibrillar                      |                                   |                             |

|                                                                                      |  |  |
|--------------------------------------------------------------------------------------|--|--|
| pattern (soles only) (100%)                                                          |  |  |
| Homogenous pattern (88%)                                                             |  |  |
| Peas in a pod pattern (parallel furrow + globules on ridges) (congenital nevi) (96%) |  |  |

**Benign patterns of acral nevi: Alternate naming**

For the structure "Parallel furrow pattern" (100% positive votes), some panelists suggested alternate naming. Please select which naming pattern you would prefer.

- 1, ORIGINAL: Parallel furrow pattern
- 2, ALTERNATE: Parallel furrow pattern (with pattern variations including single line, double line, single dotted line, double dotted line)

**DERMOSCOPY OF NAILS**

**Nevus of the nail**

|                                                                                   | No, do NOT include this structure | YES, include this structure |
|-----------------------------------------------------------------------------------|-----------------------------------|-----------------------------|
| Homogenous brown background coloration (92%)                                      |                                   |                             |
| Uniform band thickness, color, and spacing with parallel band configuration (96%) |                                   |                             |

**Lentigo of the nail (melanotic macule of the nail)**

|                                                               | No, do NOT include this structure | YES, include this structure |
|---------------------------------------------------------------|-----------------------------------|-----------------------------|
| Multiple thin homogenous gray lines +/- gray background (88%) |                                   |                             |

**Lentigo of the nail: Alternate naming**

For the structure "Multiple thin homogenous gray lines +/- gray background" (88% positive

votes), some panelists suggested alternate naming. Please select which naming you would prefer.

- 1, ORIGINAL: Multiple thin homogenous gray lines +/- gray background
- 2, ALTERNATE: Multiple thin homogenous gray lines (or single gray band) +/- gray background

**Melanoma of the nail**

|                                                                                                 | No, do NOT include this structure | YES, include this structure |
|-------------------------------------------------------------------------------------------------|-----------------------------------|-----------------------------|
| Triangular shape of pigment band (band diameter wider at proximal end) (96%)                    |                                   |                             |
| Pigmentation of periungual skin (micro-Hutchinson's sign) (100%)                                |                                   |                             |
| Brown to black dots/globules associated with longitudinal lines (92%)                           |                                   |                             |
| Longitudinal brown/black lines with irregular spacing, width, coloration, or parallelism (100%) |                                   |                             |

**Melanoma of the nail: Additional Structures**

Panelist suggestions for additional structures not provided in the 'Structures - Round 1' survey are presented here. Please rate how strongly you would agree / disagree with their inclusion.

|                                              | Strongly Disagree | Disagree | Neutral | Agree | Strongly Agree |
|----------------------------------------------|-------------------|----------|---------|-------|----------------|
| Blurring of band borders                     |                   |          |         |       |                |
| Band width >3mm or > 2/3 of nail plate width |                   |          |         |       |                |

**Subungual Hemorrhage**

|  | No, do NOT include this | YES, include this structure |
|--|-------------------------|-----------------------------|
|  |                         |                             |

|                                                                         | structure |  |
|-------------------------------------------------------------------------|-----------|--|
| Well circumscribed red-black dots or blotches (100%)                    |           |  |
| Distal streaks of red-brown coloration ("filamentous" distal end) (96%) |           |  |
| Homogenous red/purple/black coloration without melanin granules (88%)   |           |  |

## OTHER

### Scabies

|                                                                                                                                                | No, do NOT include this structure | YES, include this structure |
|------------------------------------------------------------------------------------------------------------------------------------------------|-----------------------------------|-----------------------------|
| Delta-wing jet with contrail sign (small dark brown triangular structure located at the end of whitish structureless curved/wavy lines) (100%) |                                   |                             |

## SPECIAL SITES / OTHER: FINALIZING VOTES

The following special sites (trichoscopy, dermoscopy of mucosal surfaces) and diagnosis (lichen planus) narrowly did not reach consensus in the diagnoses surveys (65-69.9% agreement). Please confirm whether you believe these special sites / diagnoses should be included as core competencies for resident education in dermoscopy.

|                                                                | No, do NOT include this diagnosis / special site | YES, include this diagnosis / special site |
|----------------------------------------------------------------|--------------------------------------------------|--------------------------------------------|
| Trichoscopy (dermoscopy of the hair and scalp) (65% agreement) |                                                  |                                            |
| Dermoscopy of                                                  |                                                  |                                            |

|                                  |  |  |
|----------------------------------|--|--|
| mucosal surfaces (65% agreement) |  |  |
| Lichen planus (65% agreement)    |  |  |

If you have any additional comments about the survey overall, please note here:

---

### DERMOSCOPIIC FEATURES – ROUND 3

This **brief survey** is intended as a follow-up to 'Structures Round 2' and will finalize all decisions for group consensus on dermoscopic structures

We will ask panelists to re-evaluate a small number structures based on group opinion (**only those structures that were newly proposed for the first time in 'Structures - Round 2'**) in order to **finalize their vote on inclusion** of each.

Panelists will also be asked to vote on **alternative language** for two structures that was proposed via write-in comments.

### NONMELANOCYTIC LESIONS

To ensure agreement on included structures, we have provided the percentage of panelists who voted "agree" or "strongly agree" on structures that were newly proposed in the 'Structures - Round 2' survey. Structures with < 70% positive votes did not reach preliminary consensus. Please confirm your vote to finalize the decision on inclusion / exclusion of each structure.

#### Basal cell carcinoma

|                                                                                       | No, do NOT include this structure | YES, include this structure |
|---------------------------------------------------------------------------------------|-----------------------------------|-----------------------------|
| Short fine telangiectasias (superficial BCC) (62%)                                    |                                   |                             |
| Shiny white to red structureless and milky pink areas (glass-like translucency) (27%) |                                   |                             |

#### Pigmented actinic keratosis

|  | No, do NOT | YES, include |
|--|------------|--------------|
|  |            |              |

|                         | include this structure | this structure |
|-------------------------|------------------------|----------------|
| Surface scale (89%)     |                        |                |
| Patent follicles (38%)  |                        |                |
| Moth-eaten border (31%) |                        |                |

### **Squamous cell carcinoma**

|                                                   | No, do NOT include this structure | YES, include this structure |
|---------------------------------------------------|-----------------------------------|-----------------------------|
| Polymorphic blood vessel morphology (42%)         |                                   |                             |
| Linear irregular (serpentine) blood vessels (42%) |                                   |                             |

### **Squamous cell carcinoma: Alternate naming**

For the structure "Ulceration / blood spots / hemorrhage", we would like to confirm votes for naming. Please select which you would prefer.

- 1, ORIGINAL: Ulceration / blood spots / hemorrhage
- 2, ALTERNATE: Split into two separate structures: "Ulceration" and "Blood spots / hemorrhage"

### **Lichen planus-like keratosis / Benign lichenoid keratosis**

|                                                       | No, do NOT include this structure | YES, include this structure |
|-------------------------------------------------------|-----------------------------------|-----------------------------|
| Sharp, cut off borders (scalloped / moth-eaten) (73%) |                                   |                             |
| Pigment network remnant (46%)                         |                                   |                             |
| Pinpoint / dotted blood vessels (31%)                 |                                   |                             |

### **Dermatofibroma**

|                                      | No, do NOT include this structure | YES, include this structure |
|--------------------------------------|-----------------------------------|-----------------------------|
| Vascular structures (vascular blush) |                                   |                             |



|                                    |  |  |
|------------------------------------|--|--|
| within scar-like white patch (50%) |  |  |
|------------------------------------|--|--|

## MELANOCYTIC LESIONS

### Congenital melanocytic nevi

|                         | No, do NOT include this structure | YES, include this structure |
|-------------------------|-----------------------------------|-----------------------------|
| Pigment dropout (31%)   |                                   |                             |
| Keratin retention (27%) |                                   |                             |

### Intradermal nevi

|                                                         | No, do NOT include this structure | YES, include this structure |
|---------------------------------------------------------|-----------------------------------|-----------------------------|
| Homogenous (structureless) brown/tan pigmentation (85%) |                                   |                             |

### Intradermal nevi: Alternative naming

For the structure "Homogenous (structureless) brown/tan pigmentation" (85% positive votes), some panelists suggested alternate naming. Please select which naming you would prefer.

- 1, ORIGINAL: Homogenous (structureless) brown/tan pigmentation
- 2, ALTERNATE: Small foci of homogenous (structureless) brown/tan pigmentation

### Recurrent (persistent) nevi

|                                     | No, do NOT include this structure | YES, include this structure |
|-------------------------------------|-----------------------------------|-----------------------------|
| Uniformity of pigment network (38%) |                                   |                             |

## MELANOMA

### Overview of melanoma characteristics

|                                      | No, do NOT include this structure | YES, include this structure |
|--------------------------------------|-----------------------------------|-----------------------------|
| Asymmetry of border abruptness (35%) |                                   |                             |
| Multiple hyperpigmented areas (31%)  |                                   |                             |

**Lentigo maligna melanoma: Alternate naming**

For the structure "Target pattern (circle within a circle) (isobar)" (100% positive votes), some panelists suggested that "target pattern" should not be part of this structure name. Please select which option you would prefer.

- 1, ORIGINAL: Target pattern (circle within a circle) (isobar)
- 2, ALTERNATE: Circle within a circle (isobar)

**Melanoma of the nail**

|                                                    | No, do NOT include this structure | YES, include this structure |
|----------------------------------------------------|-----------------------------------|-----------------------------|
| Band width >3mm or > 2/3 of nail plate width (69%) |                                   |                             |
| Blurring of band borders (50%)                     |                                   |                             |

If you have any additional comments about the survey overall, please note here

---

**DERMOSCOPIC IMAGES – ROUND 1**

For each diagnosis, we would like to determine if the following images should be included as classic teaching images in the dermoscopy core competencies, and if they demonstrate good examples of associated dermoscopic structures. We will provide examples of images for each structure. Please rate how well you believe EACH image is representative of the indicated structure.

Basal cell carcinoma: Leaf-like structures

Below, please rate EACH image on how strongly you agree that the image is representative of this structure.









|         | Strongly disagree     | Disagree              | Neutral               | Agree                 | Strongly agree        |
|---------|-----------------------|-----------------------|-----------------------|-----------------------|-----------------------|
| Image A | <input type="radio"/> |
| Image B | <input type="radio"/> |
| Image C | <input type="radio"/> |
| Image D | <input type="radio"/> |

Basal cell carcinoma: Blue-gray ovoid nests

Below, please rate EACH image on how strongly you agree that the image is representative of this structure.

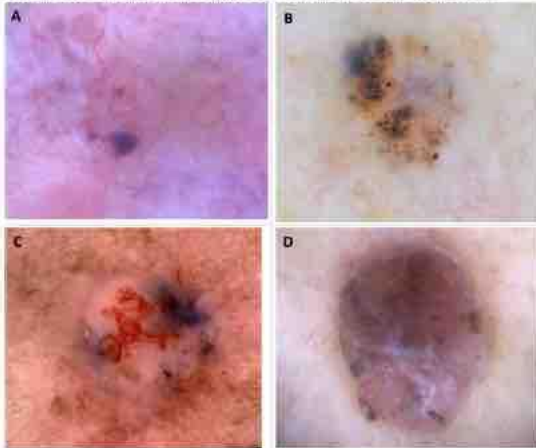

|         | Strongly disagree     | Disagree              | Neutral               | Agree                 | Strongly agree        |
|---------|-----------------------|-----------------------|-----------------------|-----------------------|-----------------------|
| Image A | <input type="radio"/> |
| Image B | <input type="radio"/> |
| Image C | <input type="radio"/> |
| Image D | <input type="radio"/> |

Basal cell carcinoma: Multiple blue-gray dots and globules (buckshot scatter)

Below, please rate EACH image on how strongly you agree that the image is representative of this structure.

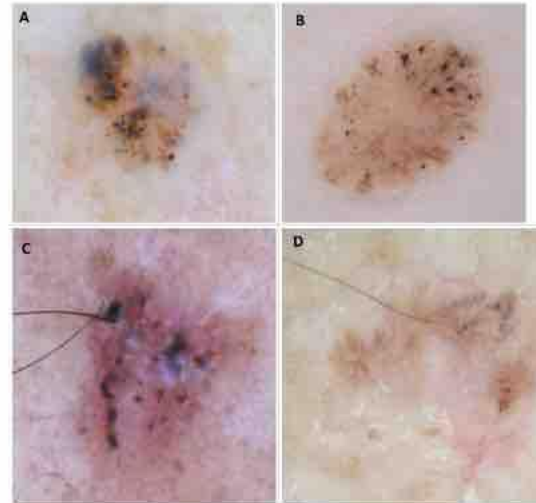

|         | Strongly disagree     | Disagree              | Neutral               | Agree                 | Strongly agree        |
|---------|-----------------------|-----------------------|-----------------------|-----------------------|-----------------------|
| Image A | <input type="radio"/> |
| Image B | <input type="radio"/> |
| Image C | <input type="radio"/> |
| Image D | <input type="radio"/> |

Basal cell carcinoma: Spoke wheel-like structures / concentric structures

Below, please rate EACH image on how strongly you agree that the image is representative of this structure.

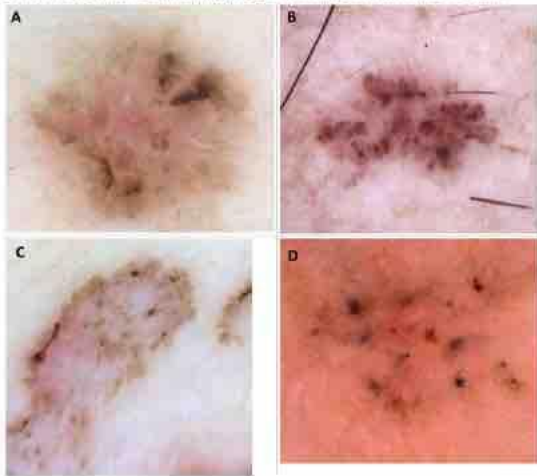

|         | Strongly disagree     | Disagree              | Neutral               | Agree                 | Strongly agree        |
|---------|-----------------------|-----------------------|-----------------------|-----------------------|-----------------------|
| Image A | <input type="radio"/> |
| Image B | <input type="radio"/> |
| Image C | <input type="radio"/> |
| Image D | <input type="radio"/> |

Basal cell carcinoma: Ulceration / erosion

Below, please rate EACH image on how strongly you agree that the image is representative of this structure.

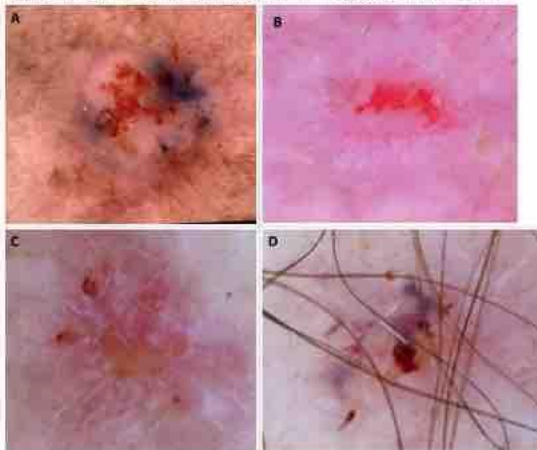

|         | Strongly disagree     | Disagree              | Neutral               | Agree                 | Strongly agree        |
|---------|-----------------------|-----------------------|-----------------------|-----------------------|-----------------------|
| Image A | <input type="radio"/> |
| Image B | <input type="radio"/> |
| Image C | <input type="radio"/> |
| Image D | <input type="radio"/> |

Basal cell carcinoma: White shiny blotches and strands

Below, please rate EACH image on how strongly you agree that the image is representative of this structure.

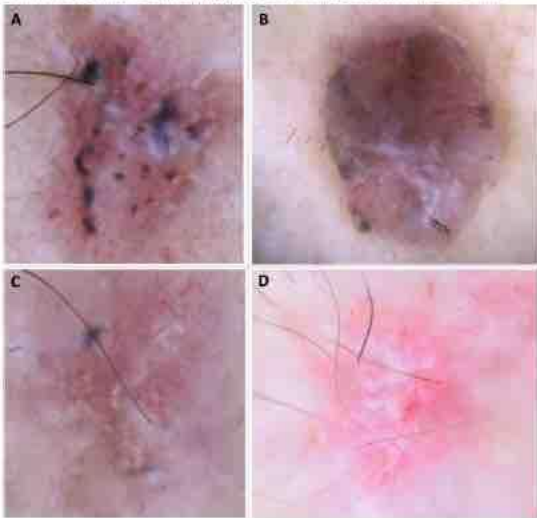

|         | Strongly disagree     | Disagree              | Neutral               | Agree                 | Strongly agree        |
|---------|-----------------------|-----------------------|-----------------------|-----------------------|-----------------------|
| Image A | <input type="radio"/> |
| Image B | <input type="radio"/> |
| Image C | <input type="radio"/> |
| Image D | <input type="radio"/> |

Basal cell carcinoma: Arborescing blood vessels

Below, please rate EACH image on how strongly you agree that the image is representative of this structure.

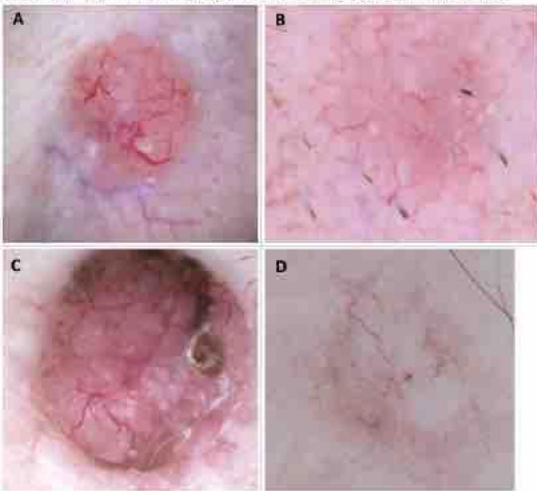

|         | Strongly disagree     | Disagree              | Neutral               | Agree                 | Strongly agree        |
|---------|-----------------------|-----------------------|-----------------------|-----------------------|-----------------------|
| Image A | <input type="radio"/> |
| Image B | <input type="radio"/> |
| Image C | <input type="radio"/> |
| Image D | <input type="radio"/> |

**Basal cell carcinoma: Short fine telangiectasias (superficial BCC)**

Below, please rate EACH image on how strongly you agree that the image is representative of this structure.

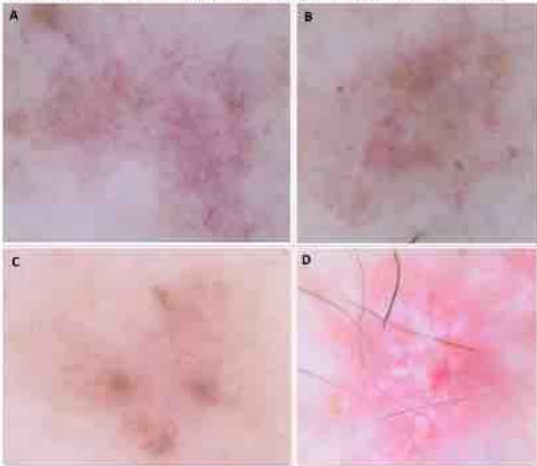

|         | Strongly disagree     | Disagree              | Neutral               | Agree                 | Strongly agree        |
|---------|-----------------------|-----------------------|-----------------------|-----------------------|-----------------------|
| Image A | <input type="radio"/> |
| Image B | <input type="radio"/> |
| Image C | <input type="radio"/> |
| Image D | <input type="radio"/> |

If you have any additional comments, please add here.

\_\_\_\_\_

**NONMELANOCYTIC: Actinic keratosis**

The following structures reached consensus for this diagnosis:

- Rosette sign
- Surface scale
- Strawberry pattern (pink-red pseudonetwork +/- fine, wavy vessels (straight or coiled) surrounding hair follicles +/- white circles with central yellow clod (targetoid hair follicles))

We would like to identify representative teaching images for each structure.

We will provide examples of images for each structure. Please rate how well you believe EACH image is representative of the indicated structure.

Actinic keratosis: Rosette sign

Below, please rate EACH image on how strongly you agree that the image is representative of this structure.

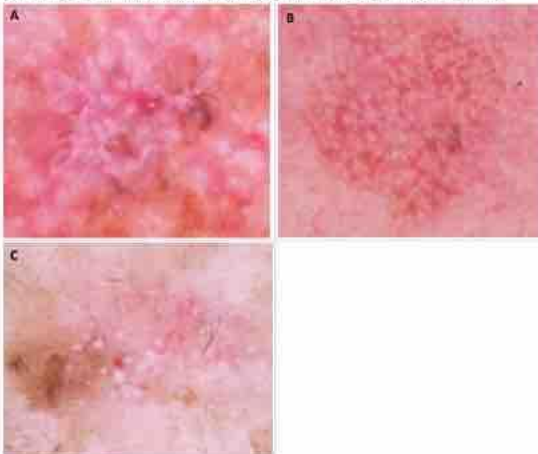

|         | Strongly disagree     | Disagree              | Neutral               | Agree                 | Strongly agree        |
|---------|-----------------------|-----------------------|-----------------------|-----------------------|-----------------------|
| Image A | <input type="radio"/> |
| Image B | <input type="radio"/> |
| Image C | <input type="radio"/> |

Actinic keratosis: Surface scale

Below, please rate EACH image on how strongly you agree that the image is representative of this structure.

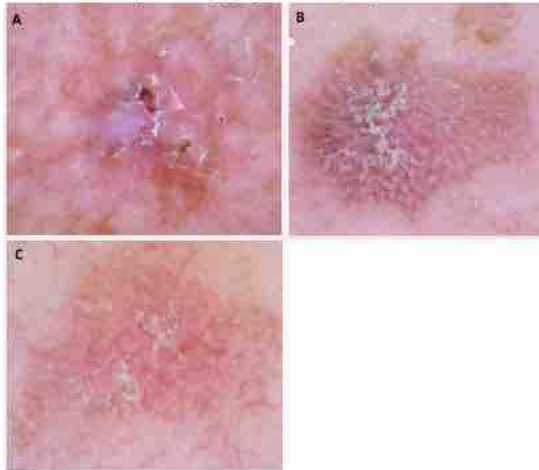

|         | Strongly disagree     | Disagree              | Neutral               | Agree                 | Strongly agree        |
|---------|-----------------------|-----------------------|-----------------------|-----------------------|-----------------------|
| Image A | <input type="radio"/> |
| Image B | <input type="radio"/> |
| Image C | <input type="radio"/> |

Actinic keratosis: Strawberry pattern (pink-red pseudonetwork +/- fine, wavy vessels (straight or coiled) surrounding hair follicles +/- white circles with central yellow clod (targetoid hair follicles))

Below, please rate EACH image on how strongly you agree that the image is representative of this structure.

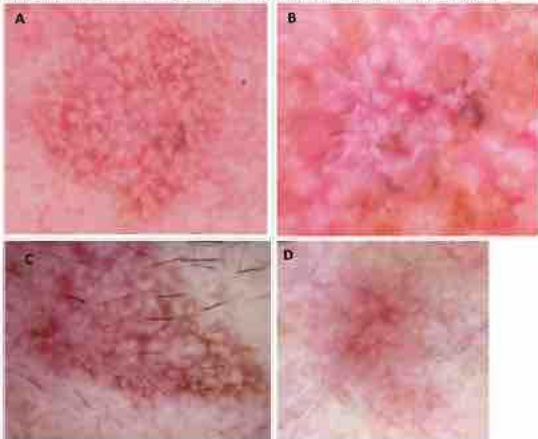

|         | Strongly disagree     | Disagree              | Neutral               | Agree                 | Strongly agree        |
|---------|-----------------------|-----------------------|-----------------------|-----------------------|-----------------------|
| Image A | <input type="radio"/> |
| Image B | <input type="radio"/> |
| Image C | <input type="radio"/> |
| Image D | <input type="radio"/> |

If you have any additional comments, please add here.

\_\_\_\_\_

**NONMELANOCYTIC: Pigmented actinic keratosis**

The following structures reached consensus for this diagnosis:

- Gray dots
- Annular-granular pattern (gray dots around follicular openings)
- Rosette sign
- Surface scale

We would like to identify representative teaching images for each structure.

We will provide examples of images for each structure. Please rate how well you believe EACH image is representative of the indicated structure.

Pigmented actinic keratosis: Gray dots

Below, please rate EACH image on how strongly you agree that the image is representative of this structure.

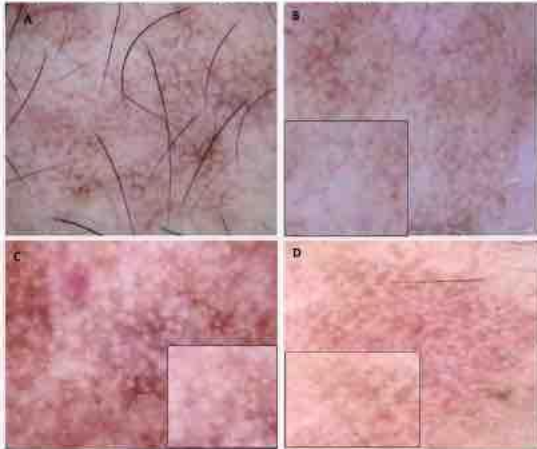

|         | Strongly disagree                | Disagree              | Neutral               | Agree                 | Strongly agree        |
|---------|----------------------------------|-----------------------|-----------------------|-----------------------|-----------------------|
| Image A | <input checked="" type="radio"/> | <input type="radio"/> | <input type="radio"/> | <input type="radio"/> | <input type="radio"/> |
| Image B | <input type="radio"/>            | <input type="radio"/> | <input type="radio"/> | <input type="radio"/> | <input type="radio"/> |
| Image C | <input type="radio"/>            | <input type="radio"/> | <input type="radio"/> | <input type="radio"/> | <input type="radio"/> |
| Image D | <input type="radio"/>            | <input type="radio"/> | <input type="radio"/> | <input type="radio"/> | <input type="radio"/> |

Pigmented actinic keratosis: Annular-granular pattern (gray dots around follicular openings)

Below, please rate EACH image on how strongly you agree that the image is representative of this structure

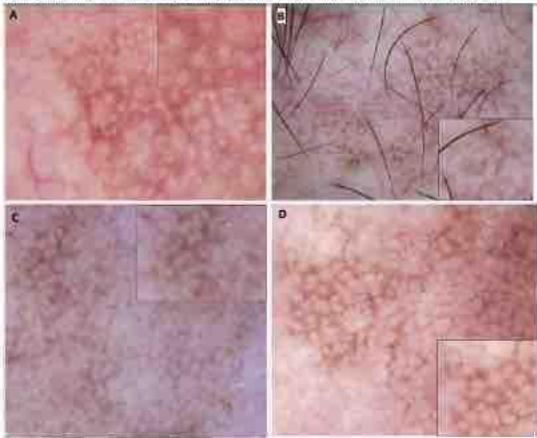

|         | Strongly disagree     | Disagree              | Neutral               | Agree                 | Strongly agree        |
|---------|-----------------------|-----------------------|-----------------------|-----------------------|-----------------------|
| Image A | <input type="radio"/> |
| Image B | <input type="radio"/> |
| Image C | <input type="radio"/> |
| Image D | <input type="radio"/> |



Pigmented actinic keratosis: Rosette sign

Below, please rate the following image on how strongly you agree that the image is representative of this structure.

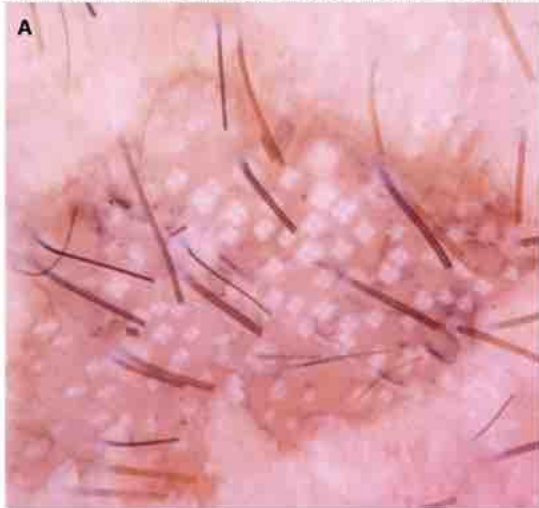

|         | Strongly disagree     | Disagree              | Neutral               | Agree                 | Strongly agree        |
|---------|-----------------------|-----------------------|-----------------------|-----------------------|-----------------------|
| Image A | <input type="radio"/> |

Pigmented actinic keratosis: Surface scale

Below, please rate EACH image on how strongly you agree that the image is representative of this structure.

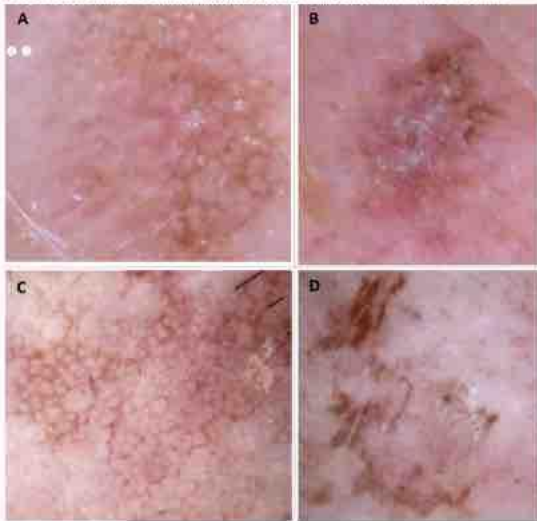

|         | Strongly disagree     | Disagree              | Neutral               | Agree                 | Strongly agree        |
|---------|-----------------------|-----------------------|-----------------------|-----------------------|-----------------------|
| Image A | <input type="radio"/> |
| Image B | <input type="radio"/> |
| Image C | <input type="radio"/> |
| Image D | <input type="radio"/> |

Please add any additional comments here

**NONMELANOCYTIC: Bowen's disease (squamous cell carcinoma in situ)**

The following structures reached consensus for this diagnosis:

- Surface scale
- Peripheral brown/gray dots arranged linearly (pigmented SCCIS)
- Glomerular (coiled) / dotted blood vessels

We would like to identify representative teaching images for each structure.

We will provide examples of images for each structure. Please rate how well you believe EACH image is representative of the indicated structure.

Bowen's disease (SCCIS): Surface scale

Below, please rate EACH image on how strongly you agree that the image is representative of this structure.

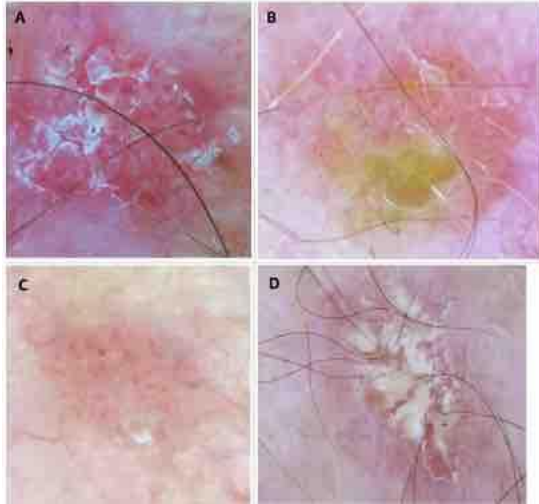

|         | Strongly disagree     | Disagree              | Neutral               | Agree                 | Strongly agree        |
|---------|-----------------------|-----------------------|-----------------------|-----------------------|-----------------------|
| Image A | <input type="radio"/> |
| Image B | <input type="radio"/> |
| Image C | <input type="radio"/> |
| Image D | <input type="radio"/> |

Bowen's disease (SCCIS): Peripheral brown/gray dots arranged linearly (pigmented SCCIS)

Below, please rate EACH image on how strongly you agree that the image is representative of this structure.

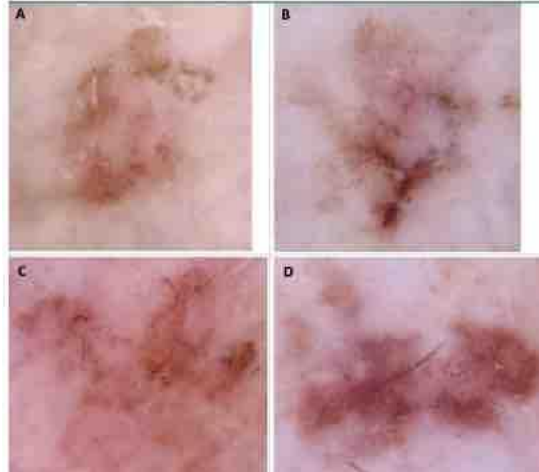

|         | Strongly disagree     | Disagree              | Neutral               | Agree                 | Strongly agree        |
|---------|-----------------------|-----------------------|-----------------------|-----------------------|-----------------------|
| Image A | <input type="radio"/> |
| Image B | <input type="radio"/> |
| Image C | <input type="radio"/> |
| Image D | <input type="radio"/> |

Bowen's disease (SCCIS): Glomerular (collied) / dotted blood vessels

Below, please rate EACH image on how strongly you agree that the image is representative of this structure.

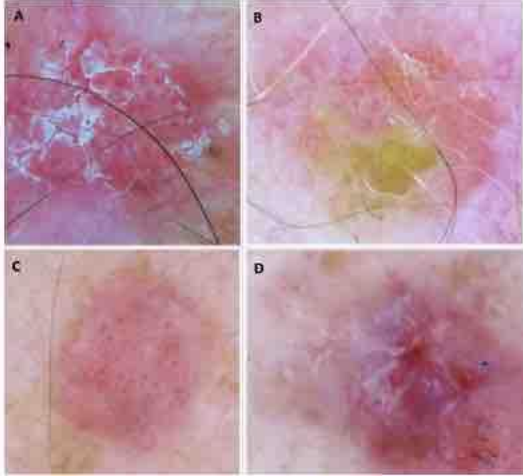

#### NONMELANOCYTIC: Keratoacanthoma

The following structures reached consensus for this diagnosis:

- Central keratin mass
- Hairpin (looped) or serpentine (linear-irregular) blood vessels, usually at the periphery, with white-yellow halo

We would like to identify representative teaching images for each structure.

We will provide examples of images for each structure. Please rate how well you believe EACH image is representative of the indicated structure.

Keratoacanthoma: Central keratin mass

Below, please rate EACH image on how strongly you agree that the image is representative of this structure.

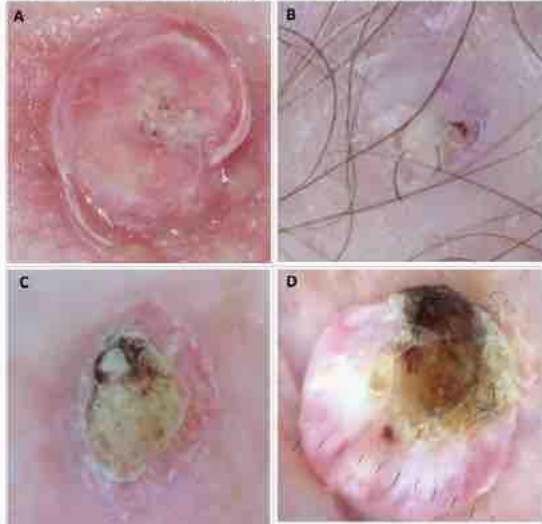

|         | Strongly disagree     | Disagree              | Neutral               | Agree                 | Strongly agree        |
|---------|-----------------------|-----------------------|-----------------------|-----------------------|-----------------------|
| Image A | <input type="radio"/> |
| Image B | <input type="radio"/> |
| Image C | <input type="radio"/> |
| Image D | <input type="radio"/> |

Keratocanthoma: Hairpin (looped) or serpentine (linear-irregular) blood vessels, usually at the periphery, with white-yellow halo

Below, please rate EACH image on how strongly you agree that the image is representative of this structure.

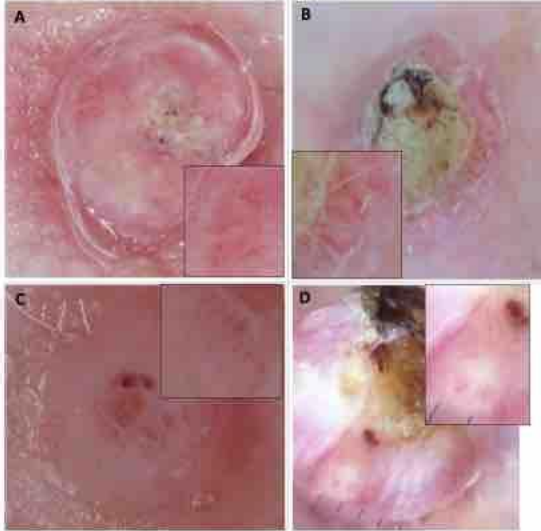

|         | Strongly disagree     | Disagree              | Neutral               | Agree                 | Strongly agree        |
|---------|-----------------------|-----------------------|-----------------------|-----------------------|-----------------------|
| Image A | <input type="radio"/> |
| Image B | <input type="radio"/> |
| Image C | <input type="radio"/> |
| Image D | <input type="radio"/> |

Please add any additional comments here.

#### NONMELANOCYTIC: Squamous cell carcinoma

The following structures reached consensus for this diagnosis:

- Yellow keratin mass / scale-crust
- Ulceration / blood spots / hemorrhage
- White circles ("keratin pearls")
- Rosette sign
- Glomerular (coiled) blood vessels
- Hairpin vessels, usually with whitish halo

We would like to identify representative teaching images for each structure.

We will provide examples of images for each structure. Please rate how well you believe EACH image is representative of the indicated structure.

Squamous cell carcinoma: Yellow keratin mass / scale-crust

Below, please rate EACH image on how strongly you agree that the image is representative of this structure.

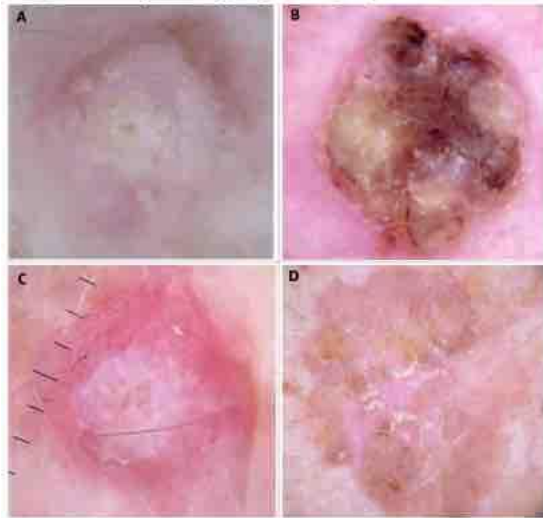

|         | Strongly disagree     | Disagree              | Neutral               | Agree                 | Strongly agree        |
|---------|-----------------------|-----------------------|-----------------------|-----------------------|-----------------------|
| Image A | <input type="radio"/> |
| Image B | <input type="radio"/> |
| Image C | <input type="radio"/> |
| Image D | <input type="radio"/> |

Squamous cell carcinoma: Ulceration / blood spots / hemorrhage

Below, please rate EACH image on how strongly you agree that the image is representative of this structure.

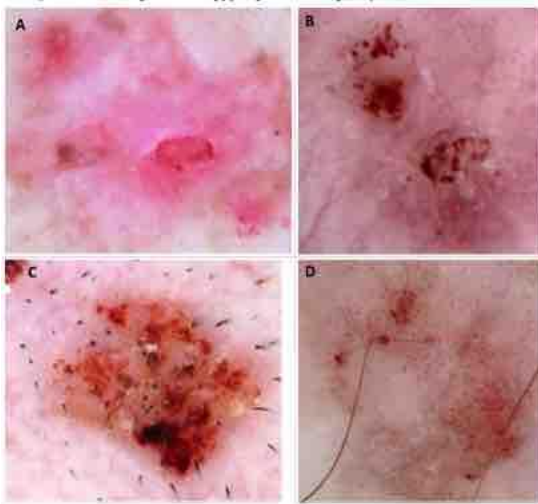

|         | Strongly disagree     | Disagree              | Neutral               | Agree                 | Strongly agree        |
|---------|-----------------------|-----------------------|-----------------------|-----------------------|-----------------------|
| Image A | <input type="radio"/> |
| Image B | <input type="radio"/> |
| Image C | <input type="radio"/> |
| Image D | <input type="radio"/> |

Squamous cell carcinoma: White circles ("keratin pearls")

Below, please rate EACH image on how strongly you agree that the image is representative of this structure.

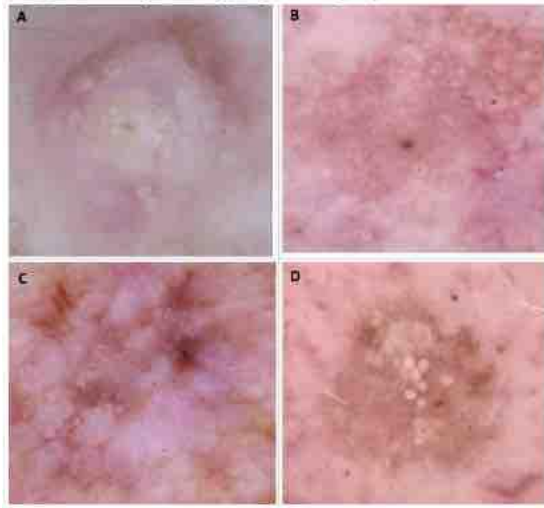

|         | Strongly disagree     | Disagree              | Neutral               | Agree                 | Strongly agree        |
|---------|-----------------------|-----------------------|-----------------------|-----------------------|-----------------------|
| Image A | <input type="radio"/> |
| Image B | <input type="radio"/> |
| Image C | <input type="radio"/> |
| Image D | <input type="radio"/> |

Squamous cell carcinoma: Rosette sign

Below, please rate EACH image on how strongly you agree that the image is representative of this structure.

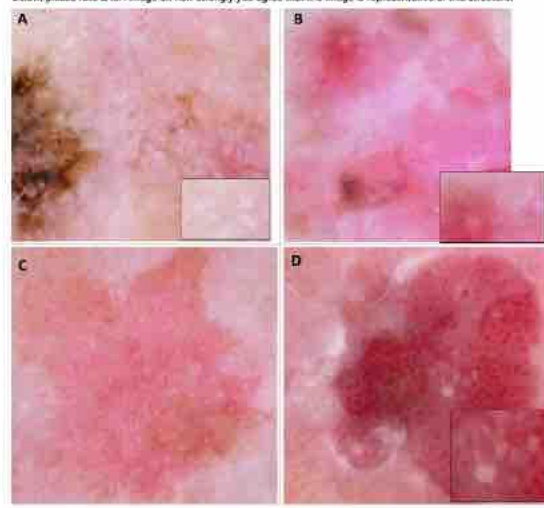

|         | Strongly disagree     | Disagree              | Neutral               | Agree                 | Strongly agree        |
|---------|-----------------------|-----------------------|-----------------------|-----------------------|-----------------------|
| Image A | <input type="radio"/> |
| Image B | <input type="radio"/> |
| Image C | <input type="radio"/> |
| Image D | <input type="radio"/> |

Squamous cell carcinoma: Glomerular (coiled) blood vessels

Below, please rate EACH image on how strongly you agree that the image is representative of this structure.

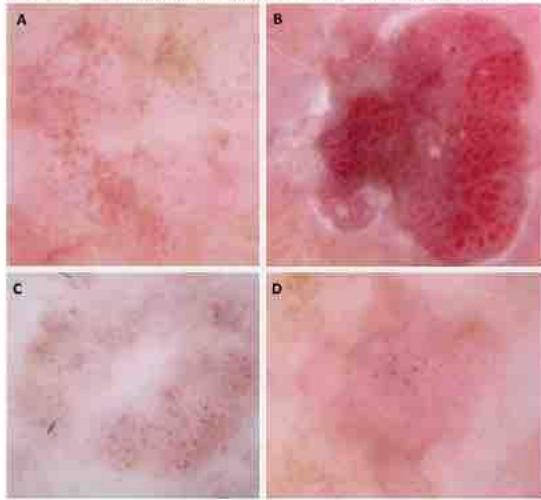

|         | Strongly disagree     | Disagree              | Neutral               | Agree                 | Strongly agree        |
|---------|-----------------------|-----------------------|-----------------------|-----------------------|-----------------------|
| Image A | <input type="radio"/> |
| Image B | <input type="radio"/> |
| Image C | <input type="radio"/> |
| Image D | <input type="radio"/> |

Squamous cell carcinoma: Hairpin vessels, usually with whitish halo

Below, please rate EACH image on how strongly you agree that the image is representative of this structure.

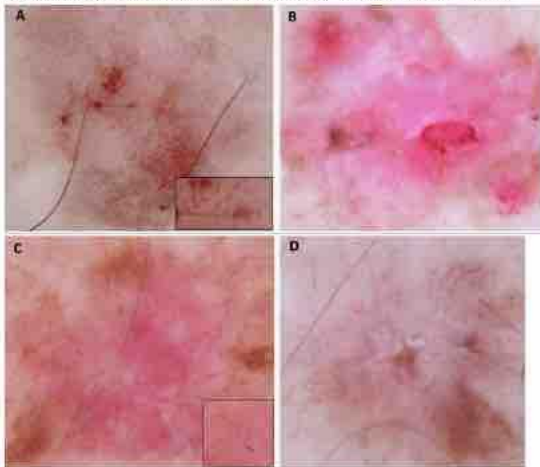

|         | Strongly disagree     | Disagree              | Neutral               | Agree                 | Strongly agree        |
|---------|-----------------------|-----------------------|-----------------------|-----------------------|-----------------------|
| Image A | <input type="radio"/> |
| Image B | <input type="radio"/> |
| Image C | <input type="radio"/> |
| Image D | <input type="radio"/> |

Please add any additional comments here.

**NONMELANOCYTIC: Solar lentigo**

The following structures reached consensus for this diagnosis:

- Moth-eaten (sharply demarcated) borders
- Homogenous light brown pigmentation
- Network-like structures
- Fingerprint-like structures (parallel lines)

We would like to identify representative teaching images for each structure.

We will provide examples of images for each structure. Please rate how well you believe EACH image is representative of the indicated structure.

Solar lentigo: Moth-eaten (sharply demarcated) borders

Below, please rate EACH image on how strongly you agree that the image is representative of this structure.

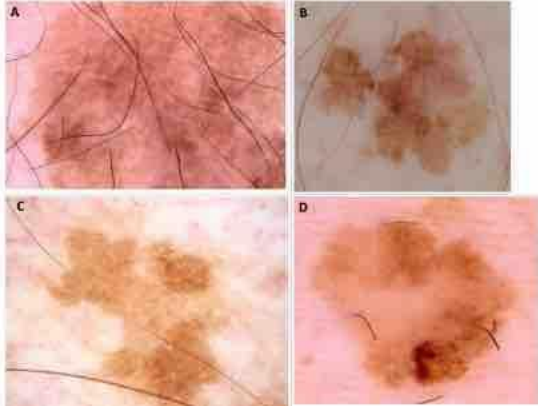

|         | Strongly disagree     | Disagree              | Neutral               | Agree                 | Strongly agree        |
|---------|-----------------------|-----------------------|-----------------------|-----------------------|-----------------------|
| Image A | <input type="radio"/> |
| Image B | <input type="radio"/> |
| Image C | <input type="radio"/> |
| Image D | <input type="radio"/> |

Solar lentigo: Homogenous light brown pigmentation

Below, please rate EACH image on how strongly you agree that the image is representative of this structure.

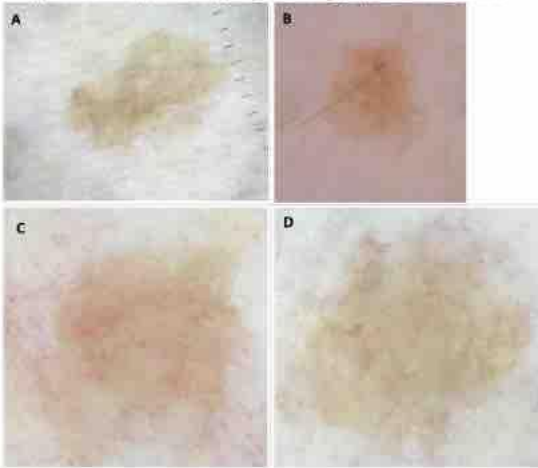

|         | Strongly disagree     | Disagree              | Neutral               | Agree                 | Strongly agree        |
|---------|-----------------------|-----------------------|-----------------------|-----------------------|-----------------------|
| Image A | <input type="radio"/> |
| Image B | <input type="radio"/> |
| Image C | <input type="radio"/> |



Image D

Solar lentigo: Network-like structures

Below, please rate EACH image on how strongly you agree that the image is representative of this structure.

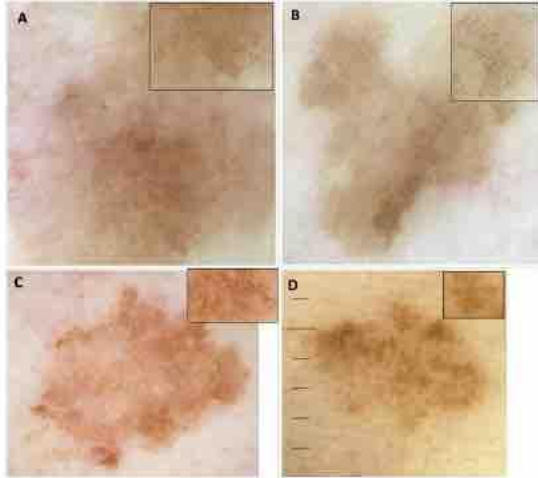

|         | Strongly disagree     | Disagree              | Neutral               | Agree                 | Strongly agree        |
|---------|-----------------------|-----------------------|-----------------------|-----------------------|-----------------------|
| Image A | <input type="radio"/> |
| Image B | <input type="radio"/> |
| Image C | <input type="radio"/> |
| Image D | <input type="radio"/> |

Solar lentigo: Fingerprint-like structures (parallel lines)

Below, please rate EACH image on how strongly you agree that the image is representative of this structure.

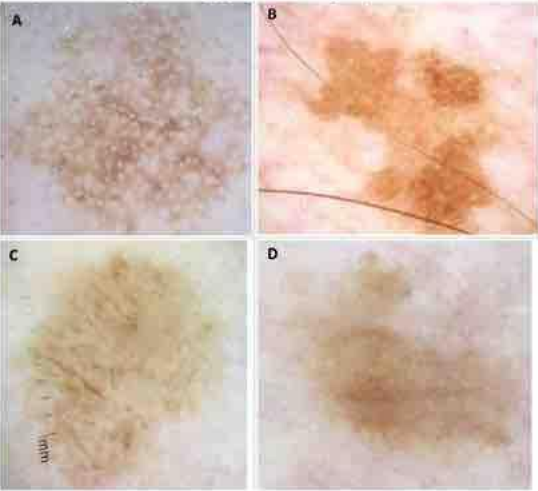

|         | Strongly disagree     | Disagree              | Neutral               | Agree                 | Strongly agree        |
|---------|-----------------------|-----------------------|-----------------------|-----------------------|-----------------------|
| Image A | <input type="radio"/> |
| Image B | <input type="radio"/> |
| Image C | <input type="radio"/> |
| Image D | <input type="radio"/> |

Please add any additional comments here.

\_\_\_\_\_

**NONMELANOCYTIC: Simple lentigo (lentigo simplex)**

The following structure reached consensus for this diagnosis:  
 - Symmetric with uniform pigment network

We would like to identify representative teaching images for this structure.

We will provide examples of images for this structure. Please rate how well you believe EACH image is representative of the indicated structure.

Simple lentigo (lentigo simplex): Symmetric with uniform pigment network

Below, please rate EACH image on how strongly you agree that the image is representative of this structure.

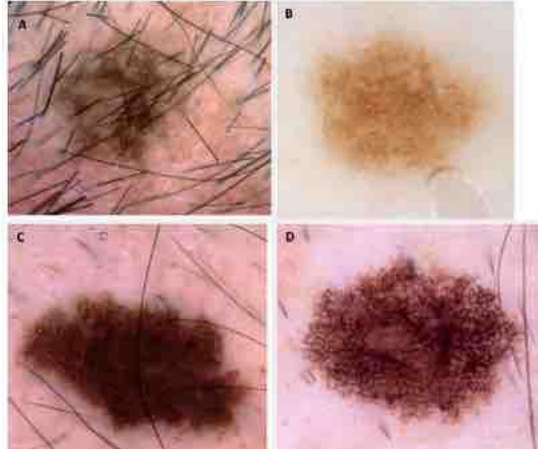

**NONMELANOCYTIC: Seborrheic keratosis**

The following structures reached consensus for this diagnosis:

- Milium-like cysts
- Comedo-like openings
- Moth-eaten (sharply demarcated) borders
- "Fissures and ridges" / gyri and sulci / cerebriform pattern
- Fat-fingers
- Fingerprint-like structures
- Hairpin (looped) vessels, usually with whitish halo

We would like to identify representative teaching images for each structure.

We will provide examples of images for each structure. Please rate how well you believe EACH image is representative of the indicated structure.

Seborrheic keratosis: Milium-like cysts

Below, please rate EACH image on how strongly you agree that the image is representative of this structure.

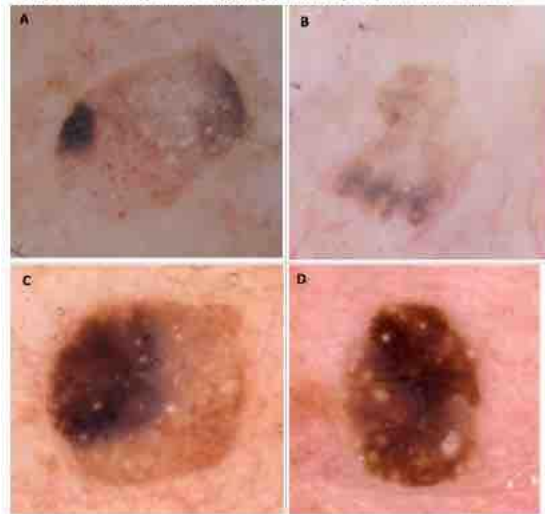

|         | Strongly disagree     | Disagree              | Neutral               | Agree                 | Strongly agree        |
|---------|-----------------------|-----------------------|-----------------------|-----------------------|-----------------------|
| Image A | <input type="radio"/> |
| Image B | <input type="radio"/> |
| Image C | <input type="radio"/> |
| Image D | <input type="radio"/> |

Seborrheic keratosis: Comedo-like openings

Below, please rate EACH image on how strongly you agree that the image is representative of this structure.

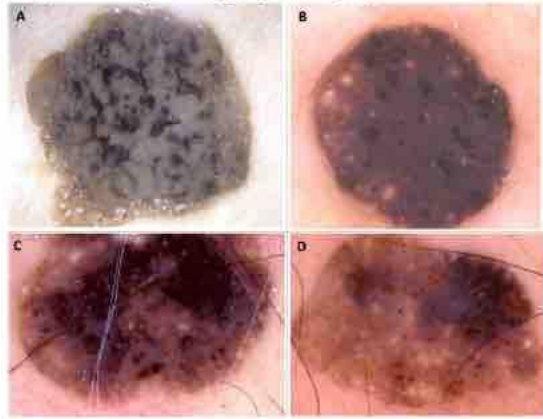

|         | Strongly disagree     | Disagree              | Neutral               | Agree                 | Strongly agree        |
|---------|-----------------------|-----------------------|-----------------------|-----------------------|-----------------------|
| Image A | <input type="radio"/> |
| Image B | <input type="radio"/> |
| Image C | <input type="radio"/> |
| Image D | <input type="radio"/> |

Seborrheic keratosis: Moth-eaten (sharply demarcated) borders

Below, please rate EACH image on how strongly you agree that the image is representative of this structure.

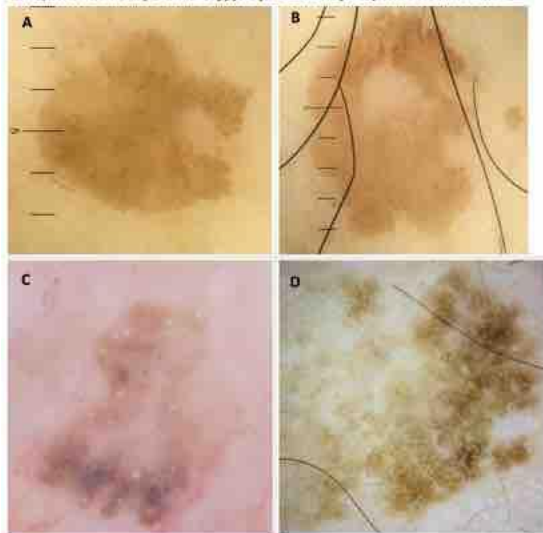

|         | Strongly disagree     | Disagree              | Neutral               | Agree                 | Strongly agree        |
|---------|-----------------------|-----------------------|-----------------------|-----------------------|-----------------------|
| Image A | <input type="radio"/> |
| Image B | <input type="radio"/> |
| Image C | <input type="radio"/> |
| Image D | <input type="radio"/> |

Seborrheic keratosis: "Flourishes and ridges" / gyri and sulci / cerebelliform pattern

Below, please rate EACH image on how strongly you agree that the image is representative of this structure.

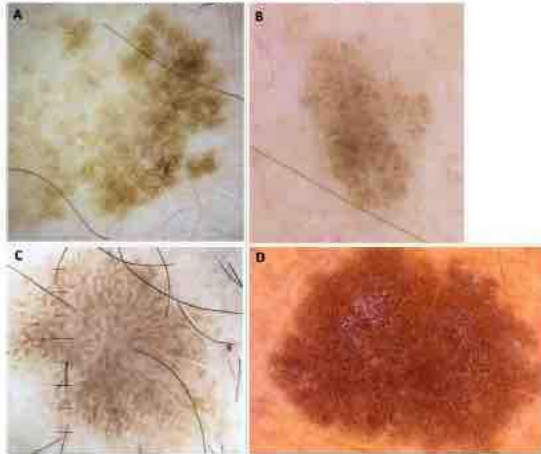

|         | Strongly disagree     | Disagree              | Neutral               | Agree                 | Strongly agree        |
|---------|-----------------------|-----------------------|-----------------------|-----------------------|-----------------------|
| Image A | <input type="radio"/> |
| Image B | <input type="radio"/> |
| Image C | <input type="radio"/> |
| Image D | <input type="radio"/> |

Seborrheic keratosis: Fat fingers

Below, please rate EACH image on how strongly you agree that the image is representative of this structure.

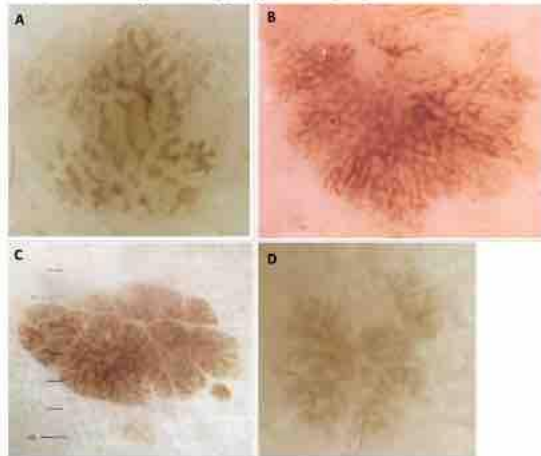

|         | Strongly disagree     | Disagree              | Neutral               | Agree                 | Strongly agree        |
|---------|-----------------------|-----------------------|-----------------------|-----------------------|-----------------------|
| Image A | <input type="radio"/> |
| Image B | <input type="radio"/> |
| Image C | <input type="radio"/> |
| Image D | <input type="radio"/> |

Seborrheic keratosis: Fingerprint-like structures

Below, please rate EACH image on how strongly you agree that the image is representative of this structure.

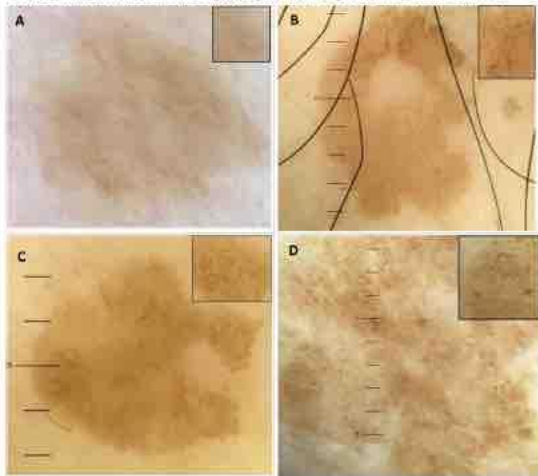

|         | Strongly disagree     | Disagree              | Neutral               | Agree                 | Strongly agree        |
|---------|-----------------------|-----------------------|-----------------------|-----------------------|-----------------------|
| Image A | <input type="radio"/> |
| Image B | <input type="radio"/> |
| Image C | <input type="radio"/> |
| Image D | <input type="radio"/> |

Seborrheic keratosis: Hairpin (looped) vessels, usually with whitish halo

Below, please rate EACH image on how strongly you agree that the image is representative of this structure.

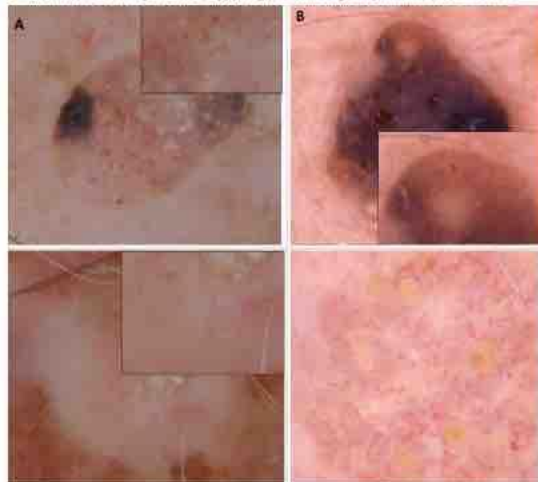

|         | Strongly disagree     | Disagree              | Neutral               | Agree                 | Strongly agree        |
|---------|-----------------------|-----------------------|-----------------------|-----------------------|-----------------------|
| Image A | <input type="radio"/> |
| Image B | <input type="radio"/> |
| Image C | <input type="radio"/> |
| Image D | <input type="radio"/> |

Please add any additional comments here.

**NONMELANOCYTIC: Lichen planus-like keratosis / benign lichenoid keratosis**

- The following structures reached consensus for this diagnosis:
- Coarse gray granularity
  - Peppering (evenly spaced gray dots)
  - Sharp, cut off borders (scalloped / moth eaten)

We would like to identify representative teaching images for each structure.

We will provide examples of images for each structure. Please rate how well you believe EACH image is representative of the indicated structure.

Lichen planus-like keratosis / benign lichenoid keratosis: Coarse gray granularity

Below, please rate EACH image on how strongly you agree that the image is representative of this structure.

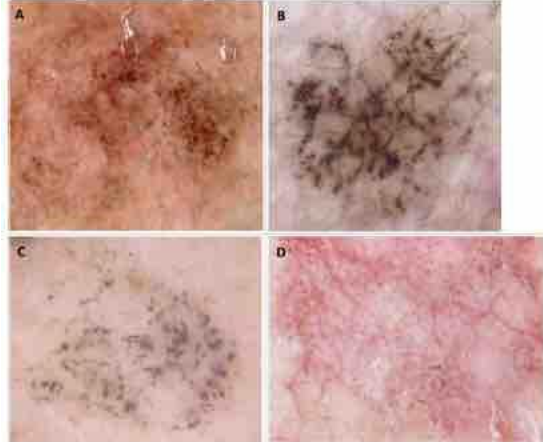

|         | Strongly disagree     | Disagree              | Neutral               | Agree                 | Strongly agree        |
|---------|-----------------------|-----------------------|-----------------------|-----------------------|-----------------------|
| Image A | <input type="radio"/> |
| Image B | <input type="radio"/> |
| Image C | <input type="radio"/> |
| Image D | <input type="radio"/> |

**Lichen planus-like keratosis / benign lichenoid keratosis: Peppering (evenly spaced gray dots)**

Below, please rate EACH image on how strongly you agree that the image is representative of this structure.

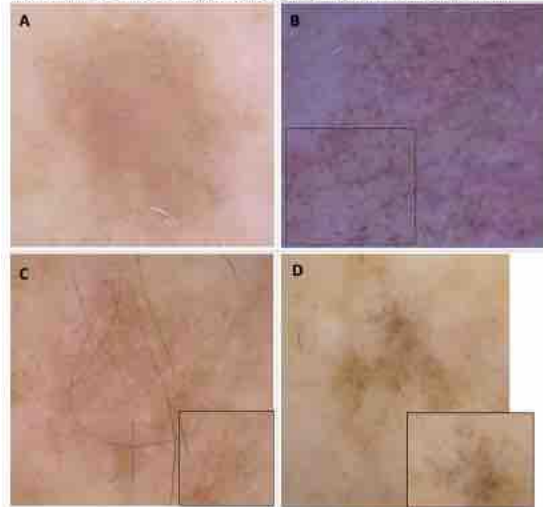

|         | Strongly disagree     | Disagree              | Neutral               | Agree                 | Strongly agree        |
|---------|-----------------------|-----------------------|-----------------------|-----------------------|-----------------------|
| Image A | <input type="radio"/> |
| Image B | <input type="radio"/> |
| Image C | <input type="radio"/> |
| Image D | <input type="radio"/> |

Lichen planus-like keratosis / benign lichenoid keratosis: Sharp, cut off borders (scaloped / moth-eaten)

Below, please rate EACH image on how strongly you agree that the image is representative of this structure.

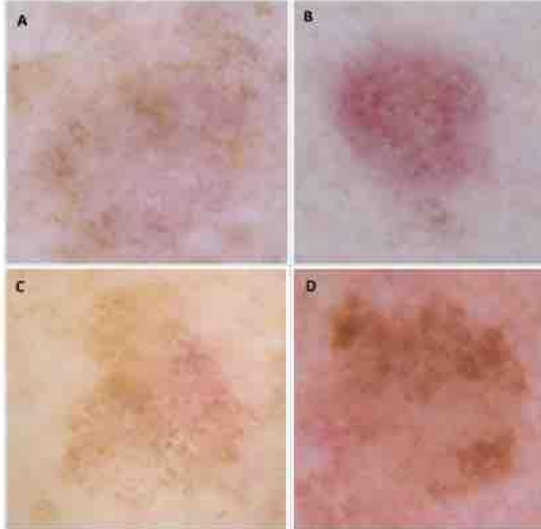

**NONMELANOCYTIC: Hemangioma / angioma**

The following structures reached consensus for this diagnosis:

- Red, blue-red, or maroon lacunae / lagoons with white septae
- Blue-black coloring (when thrombosed)

We would like to identify representative teaching images for each structure.

We will provide examples of images for each structure. Please rate how well you believe EACH image is representative of the indicated structure.

Hemangioma / angioma: Red, blue-red, or maroon lacunae / lagoons with white septae

Below, please rate EACH image on how strongly you agree that the image is representative of this structure.

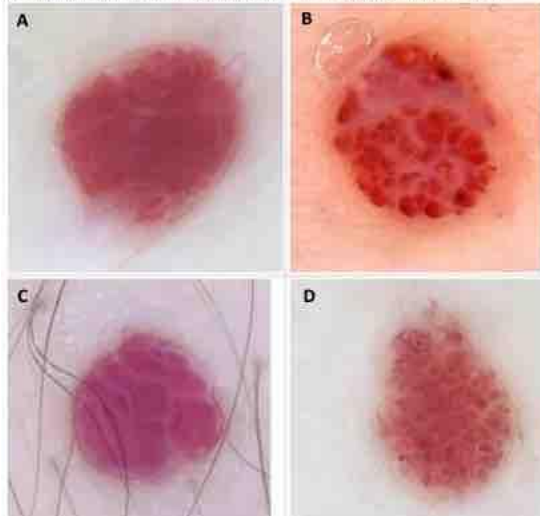

|         | Strongly disagree                | Disagree              | Neutral               | Agree                 | Strongly agree        |
|---------|----------------------------------|-----------------------|-----------------------|-----------------------|-----------------------|
| Image A | <input checked="" type="radio"/> | <input type="radio"/> | <input type="radio"/> | <input type="radio"/> | <input type="radio"/> |
| Image B | <input type="radio"/>            | <input type="radio"/> | <input type="radio"/> | <input type="radio"/> | <input type="radio"/> |
| Image C | <input type="radio"/>            | <input type="radio"/> | <input type="radio"/> | <input type="radio"/> | <input type="radio"/> |
| Image D | <input type="radio"/>            | <input type="radio"/> | <input type="radio"/> | <input type="radio"/> | <input type="radio"/> |

Hemangioma / angioma: Blue-black coloring (when thrombosed)

Below, please rate EACH image on how strongly you agree that the image is representative of this structure.

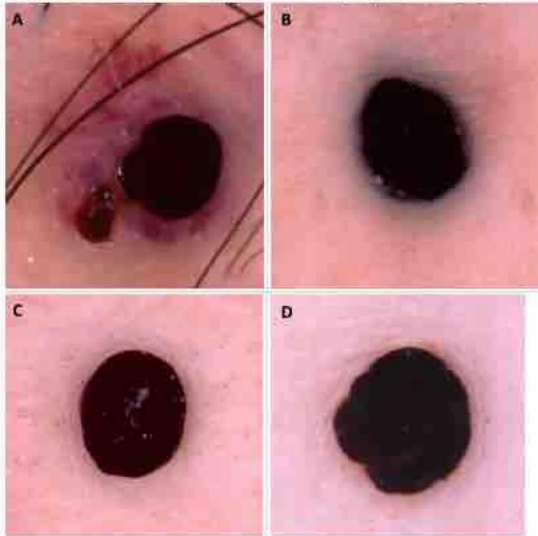

**NONMELANOCYTIC: Angiokeratoma**

The following structures reached consensus for this diagnosis:

- Red / purple / black ("dark") lacunae
- Hemorrhagic crust

We would like to identify representative teaching images for each structure.

We will provide examples of images for each structure. Please rate how well you believe EACH image is representative of the indicated structure.

Angiokeratoma: Red / purple / black ("dark") lacunae

Below, please rate EACH image on how strongly you agree that the image is representative of this structure.

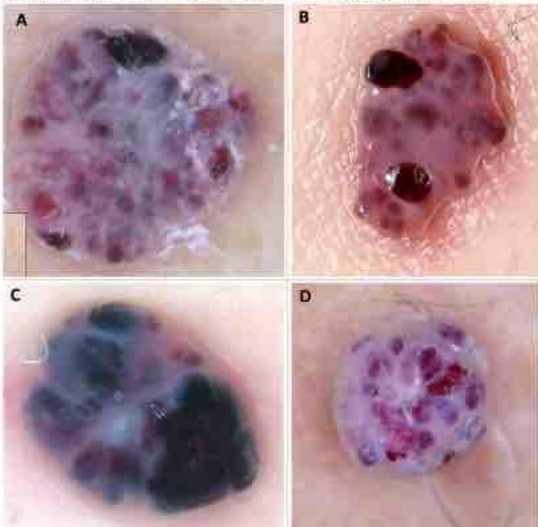



|         | Strongly disagree     | Disagree              | Neutral               | Agree                 | Strongly agree        |
|---------|-----------------------|-----------------------|-----------------------|-----------------------|-----------------------|
| Image A | <input type="radio"/> |
| Image B | <input type="radio"/> |
| Image C | <input type="radio"/> |
| Image D | <input type="radio"/> |

**Angiokeratoma: Hemorrhagic crust**

Below, please rate EACH image on how strongly you agree that the image is representative of this structure.

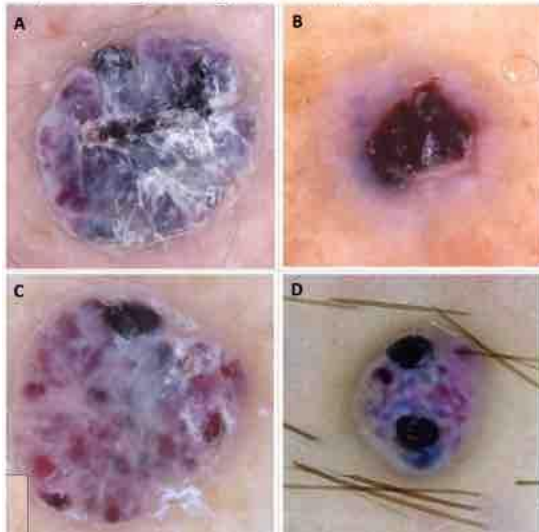

**NONMELANOCYTIC: Dermatofibroma**

The following structures reached consensus for this diagnosis:

- Central scar-like white patch with delicate surrounding network-like structures
- Ring-like globules
- Central shiny white lines (crystalline structures)

We would like to identify representative teaching images for each structure.

We will provide examples of images for each structure. Please rate how well you believe EACH image is representative of the indicated structure.

Dermatofibroma: Central scar-like white patch with delicate surrounding network-like structures

Below, please rate EACH image on how strongly you agree that the image is representative of this structure.

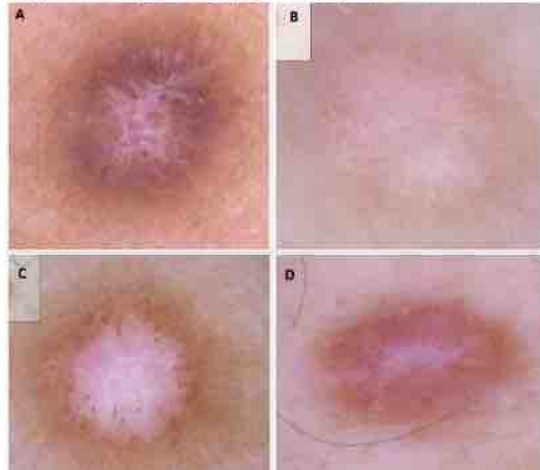

|         | Strongly disagree                | Disagree              | Neutral               | Agree                 | Strongly agree        |
|---------|----------------------------------|-----------------------|-----------------------|-----------------------|-----------------------|
| Image A | <input checked="" type="radio"/> | <input type="radio"/> | <input type="radio"/> | <input type="radio"/> | <input type="radio"/> |
| Image B | <input type="radio"/>            | <input type="radio"/> | <input type="radio"/> | <input type="radio"/> | <input type="radio"/> |
| Image C | <input type="radio"/>            | <input type="radio"/> | <input type="radio"/> | <input type="radio"/> | <input type="radio"/> |
| Image D | <input type="radio"/>            | <input type="radio"/> | <input type="radio"/> | <input type="radio"/> | <input type="radio"/> |

Dermatofibroma: Ring-like globules

Below, please rate EACH image on how strongly you agree that the image is representative of this structure.

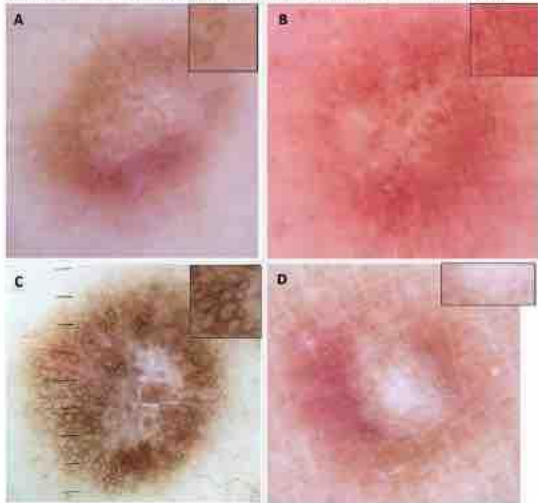

|         | Strongly disagree                | Disagree              | Neutral               | Agree                 | Strongly agree        |
|---------|----------------------------------|-----------------------|-----------------------|-----------------------|-----------------------|
| Image A | <input checked="" type="radio"/> | <input type="radio"/> | <input type="radio"/> | <input type="radio"/> | <input type="radio"/> |
| Image B | <input type="radio"/>            | <input type="radio"/> | <input type="radio"/> | <input type="radio"/> | <input type="radio"/> |
| Image C | <input type="radio"/>            | <input type="radio"/> | <input type="radio"/> | <input type="radio"/> | <input type="radio"/> |
| Image D | <input type="radio"/>            | <input type="radio"/> | <input type="radio"/> | <input type="radio"/> | <input type="radio"/> |

Dermatofibroma: Central shiny white lines (crystalline structures)

Below, please rate EACH image on how strongly you agree that the image is representative of this structure.

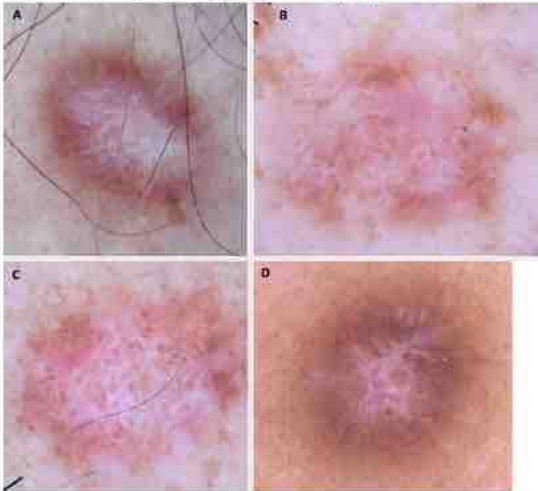

**NONMELANOCYTIC: Clear cell acanthoma**

The following structure reached consensus for this diagnosis:  
- String of pearls (serpiginous) blood vessel pattern

We would like to identify representative teaching images for this structure.

We will provide examples of images for this structure. Please rate how well you believe EACH image is representative of the indicated structure.

Clear cell acanthoma: String of pearls (serpiginous) blood vessel pattern

Below, please rate EACH image on how strongly you agree that the image is representative of this structure.

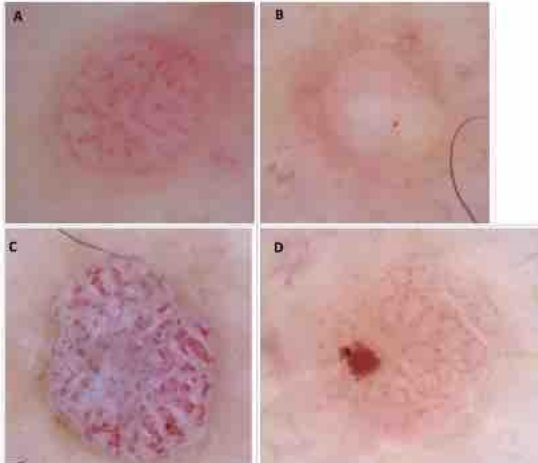

**NONMELANOCYTIC: Sebaceous hyperplasia**

The following structures reached consensus for this diagnosis:  
- Pale yellow lobules around a central follicular opening  
- Crown vessels

We would like to identify representative teaching images for each structure.

We will provide examples of images for each structure. Please rate how well you believe EACH image is representative of the indicated structure.

Sebaceous hyperplasia: Pale yellow lobules around a central follicular opening

Below, please rate EACH image on how strongly you agree that the image is representative of this structure.

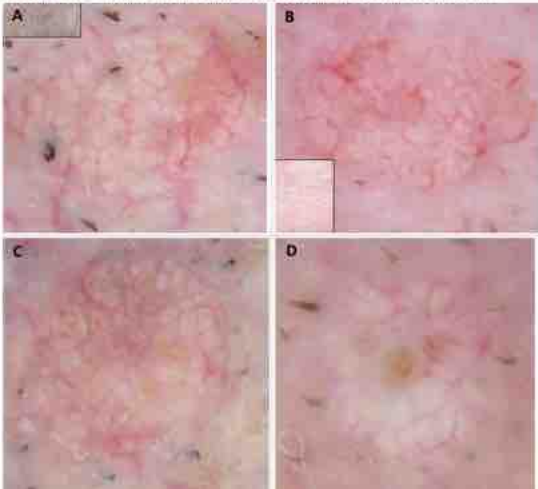

|         | Strongly disagree                | Disagree              | Neutral               | Agree                 | Strongly agree        |
|---------|----------------------------------|-----------------------|-----------------------|-----------------------|-----------------------|
| Image A | <input checked="" type="radio"/> | <input type="radio"/> | <input type="radio"/> | <input type="radio"/> | <input type="radio"/> |
| Image B | <input type="radio"/>            | <input type="radio"/> | <input type="radio"/> | <input type="radio"/> | <input type="radio"/> |
| Image C | <input type="radio"/>            | <input type="radio"/> | <input type="radio"/> | <input type="radio"/> | <input type="radio"/> |
| Image D | <input type="radio"/>            | <input type="radio"/> | <input type="radio"/> | <input type="radio"/> | <input type="radio"/> |

Sebaceous hyperplasia: Crown vessels

Below, please rate EACH image on how strongly you agree that the image is representative of this structure.

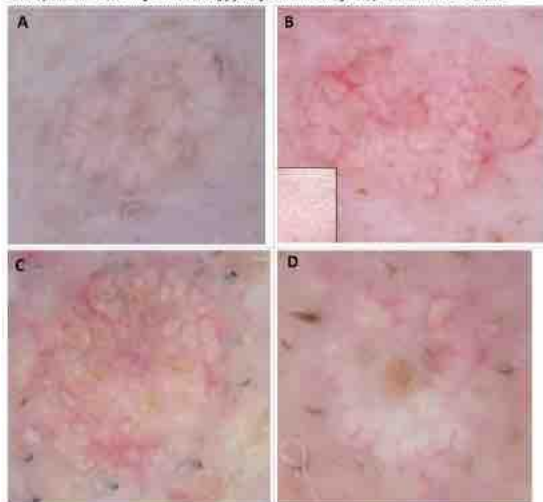

**BENIGN MELANOCYTIC: Overview of benign nevi patterns**

The following structures reached consensus for this diagnosis:

- Diffuse reticular network
- Patchy reticular network
- Peripheral reticular network with central hypopigmentation
- Peripheral reticular network with central hyperpigmentation
- Peripheral reticular network with central globules
- Homogenous (tan, brown, blue, or pink)
- Globular pattern
- Two-component pattern
- Symmetric multi-component pattern

We would like to identify representative teaching images for each structure.

We will provide examples of images for each structure. Please rate how well you believe EACH image is representative of the indicated structure.

Overview of benign nevi patterns: Diffuse reticular network

Below, please rate EACH image on how strongly you agree that the image is representative of this structure.

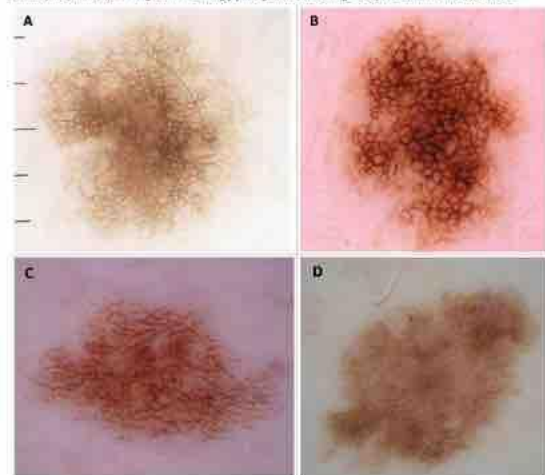

|         | Strongly disagree     | Disagree              | Neutral               | Agree                 | Strongly agree        |
|---------|-----------------------|-----------------------|-----------------------|-----------------------|-----------------------|
| Image A | <input type="radio"/> |
| Image B | <input type="radio"/> |
| Image C | <input type="radio"/> |
| Image D | <input type="radio"/> |

Overview of benign nevi patterns: Patchy reticular network

Below, please rate EACH image on how strongly you agree that the image is representative of this structure.

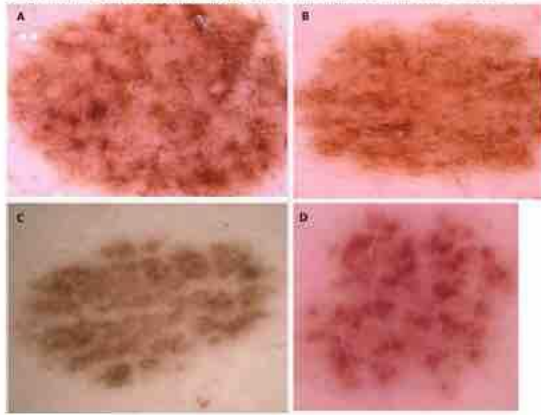

|         | Strongly disagree     | Disagree              | Neutral               | Agree                 | Strongly agree        |
|---------|-----------------------|-----------------------|-----------------------|-----------------------|-----------------------|
| Image A | <input type="radio"/> |
| Image B | <input type="radio"/> |
| Image C | <input type="radio"/> |
| Image D | <input type="radio"/> |

Overview of benign nevi patterns: Peripheral reticular network with central hypopigmentation

Below, please rate EACH image on how strongly you agree that the image is representative of this structure.

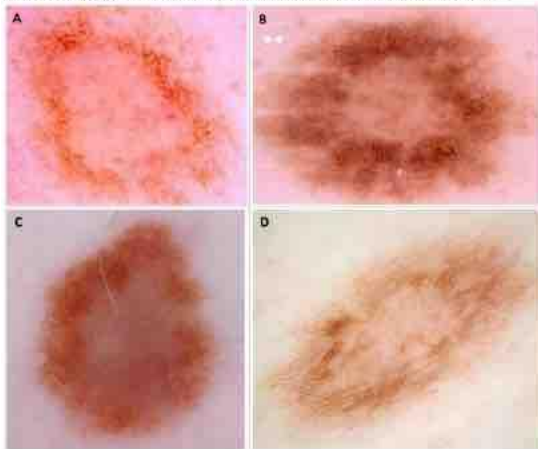

|         | Strongly disagree     | Disagree              | Neutral               | Agree                 | Strongly agree        |
|---------|-----------------------|-----------------------|-----------------------|-----------------------|-----------------------|
| Image A | <input type="radio"/> |
| Image B | <input type="radio"/> |
| Image C | <input type="radio"/> |
| Image D | <input type="radio"/> |

Overview of benign nevi patterns: Peripheral reticular network with central hyperpigmentation

Below, please rate EACH image on how strongly you agree that the image is representative of this structure.

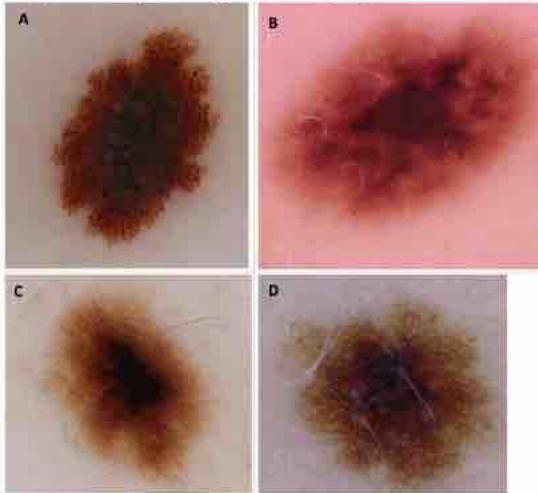

|         | Strongly disagree     | Disagree              | Neutral               | Agree                 | Strongly agree        |
|---------|-----------------------|-----------------------|-----------------------|-----------------------|-----------------------|
| Image A | <input type="radio"/> |
| Image B | <input type="radio"/> |
| Image C | <input type="radio"/> |
| Image D | <input type="radio"/> |

Overview of benign nevi patterns: Peripheral reticular network with central globules

Below, please rate EACH image on how strongly you agree that the image is representative of this structure.

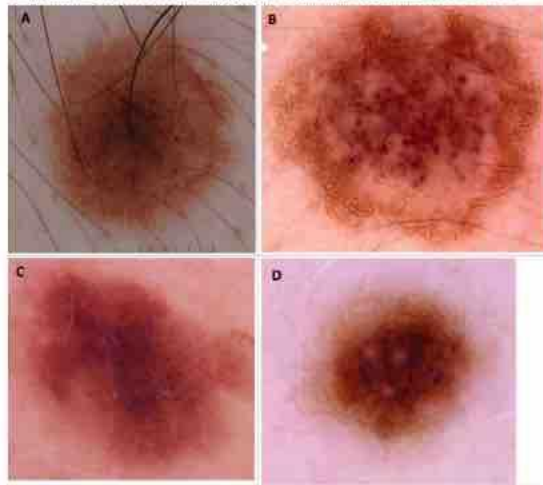

|         | Strongly disagree     | Disagree              | Neutral               | Agree                 | Strongly agree        |
|---------|-----------------------|-----------------------|-----------------------|-----------------------|-----------------------|
| Image A | <input type="radio"/> |
| Image B | <input type="radio"/> |
| Image C | <input type="radio"/> |
| Image D | <input type="radio"/> |

Overview of benign nevi patterns: Homogenous (tan, brown, blue, pink)

Below, please rate EACH image on how strongly you agree that the image is representative of this structure.

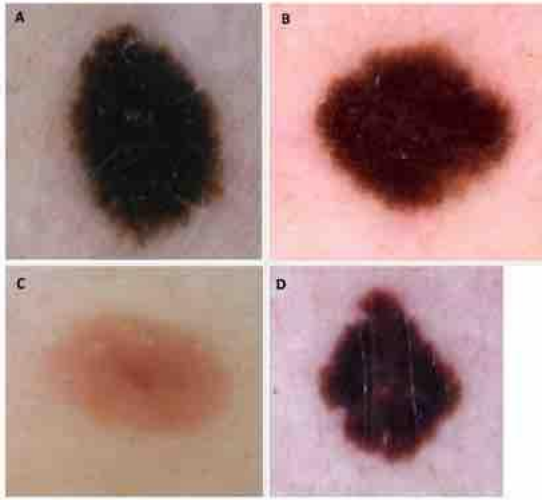

|         | Strongly disagree     | Disagree              | Neutral               | Agree                 | Strongly agree        |
|---------|-----------------------|-----------------------|-----------------------|-----------------------|-----------------------|
| Image A | <input type="radio"/> |
| Image B | <input type="radio"/> |
| Image C | <input type="radio"/> |
| Image D | <input type="radio"/> |

Overview of benign nevi patterns: Central network with evenly distributed peripheral globules

Below, please rate EACH image on how strongly you agree that the image is representative of this structure.

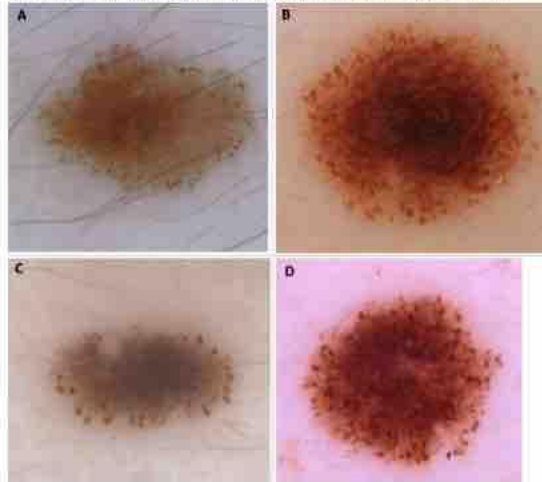

|         | Strongly disagree     | Disagree              | Neutral               | Agree                 | Strongly agree        |
|---------|-----------------------|-----------------------|-----------------------|-----------------------|-----------------------|
| Image A | <input type="radio"/> |
| Image B | <input type="radio"/> |
| Image C | <input type="radio"/> |
| Image D | <input type="radio"/> |

Overview of benign nevi patterns: Globular pattern

Below, please rate EACH image on how strongly you agree that the image is representative of this structure.

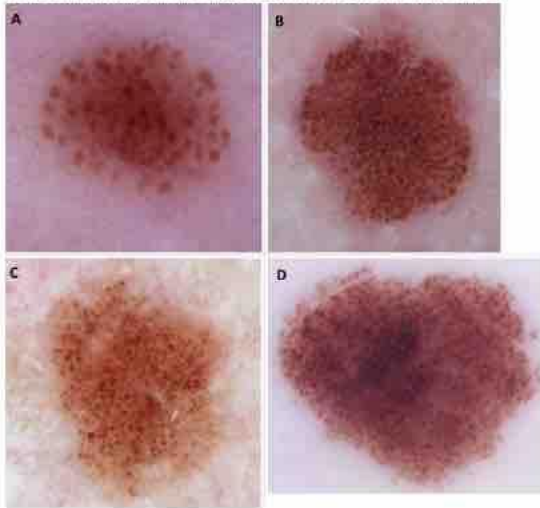

|         | Strongly disagree     | Disagree              | Neutral               | Agree                 | Strongly agree        |
|---------|-----------------------|-----------------------|-----------------------|-----------------------|-----------------------|
| Image A | <input type="radio"/> |
| Image B | <input type="radio"/> |
| Image C | <input type="radio"/> |
| Image D | <input type="radio"/> |

Overview of benign nevi patterns: Two-component pattern

Below, please rate EACH image on how strongly you agree that the image is representative of this structure.

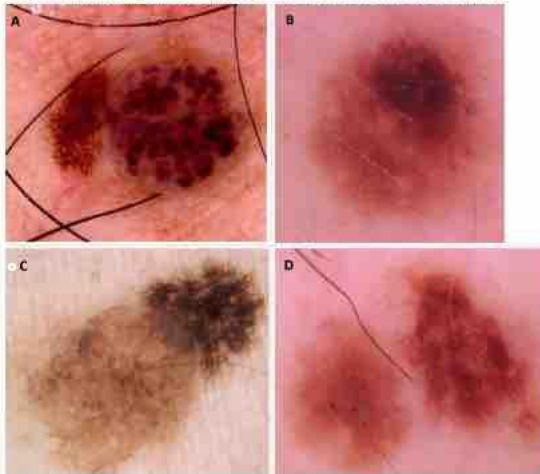

|         | Strongly disagree     | Disagree              | Neutral               | Agree                 | Strongly agree        |
|---------|-----------------------|-----------------------|-----------------------|-----------------------|-----------------------|
| Image A | <input type="radio"/> |
| Image B | <input type="radio"/> |
| Image C | <input type="radio"/> |
| Image D | <input type="radio"/> |



Overview of benign nevi patterns: Symmetric multi-component pattern

Below, please rate EACH image on how strongly you agree that the image is representative of this structure.

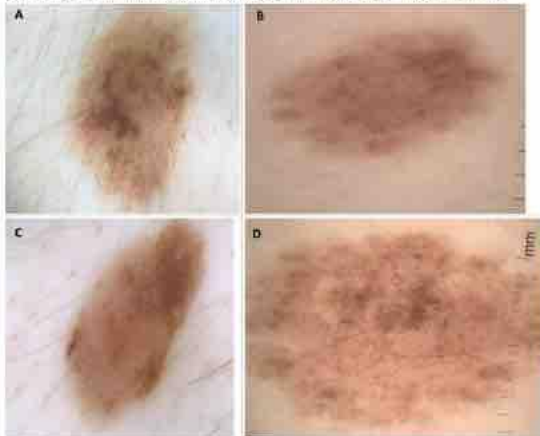

|         | Strongly disagree     | Disagree              | Neutral               | Agree                 | Strongly agree        |
|---------|-----------------------|-----------------------|-----------------------|-----------------------|-----------------------|
| Image A | <input type="radio"/> |
| Image B | <input type="radio"/> |
| Image C | <input type="radio"/> |
| Image D | <input type="radio"/> |

Please add any additional comments here.

**BENIGN MELANOCYTIC: Congenital melanocytic nevi**

The following structures reached consensus for this diagnosis:

- Cobblestone pattern / globular pattern
- Reticular network
- Diffuse background pigmentation
- Hypertrichosis
- Perifollicular hyper/hypopigmentation

We would like to identify representative teaching images for each structure.

We will provide examples of images for each structure. Please rate how well you believe EACH image is representative of the indicated structure.

Congenital melanocytic nevi: Cobblestone pattern / globular pattern

Below, please rate EACH image on how strongly you agree that the image is representative of this structure.

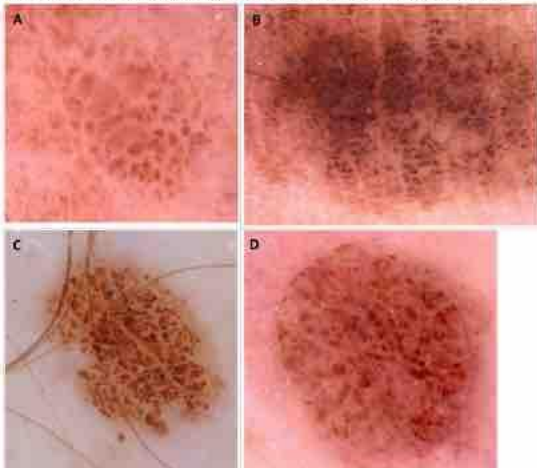

|         | Strongly disagree     | Disagree              | Neutral               | Agree                 | Strongly agree        |
|---------|-----------------------|-----------------------|-----------------------|-----------------------|-----------------------|
| Image A | <input type="radio"/> |
| Image B | <input type="radio"/> |
| Image C | <input type="radio"/> |
| Image D | <input type="radio"/> |

Congenital melanocytic nevus: Reticular network

Below, please rate EACH image on how strongly you agree that the image is representative of this structure.

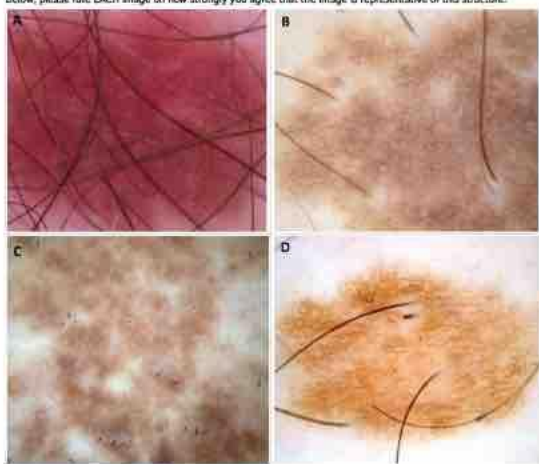

|         | Strongly disagree     | Disagree              | Neutral               | Agree                 | Strongly agree        |
|---------|-----------------------|-----------------------|-----------------------|-----------------------|-----------------------|
| Image A | <input type="radio"/> |
| Image B | <input type="radio"/> |
| Image C | <input type="radio"/> |
| Image D | <input type="radio"/> |

Congenital melanocytic nevus: Diffuse background pigmentation

Below, please rate EACH image on how strongly you agree that the image is representative of this structure.

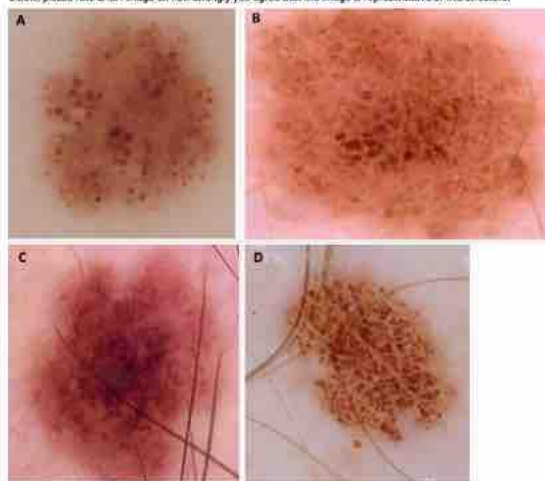

|         | Strongly disagree     | Disagree              | Neutral               | Agree                 | Strongly agree        |
|---------|-----------------------|-----------------------|-----------------------|-----------------------|-----------------------|
| Image A | <input type="radio"/> |
| Image B | <input type="radio"/> |
| Image C | <input type="radio"/> |
| Image D | <input type="radio"/> |

Congenital melanocytic nevi: Hypetrichosis

Below, please rate EACH image on how strongly you agree that the image is representative of this structure.

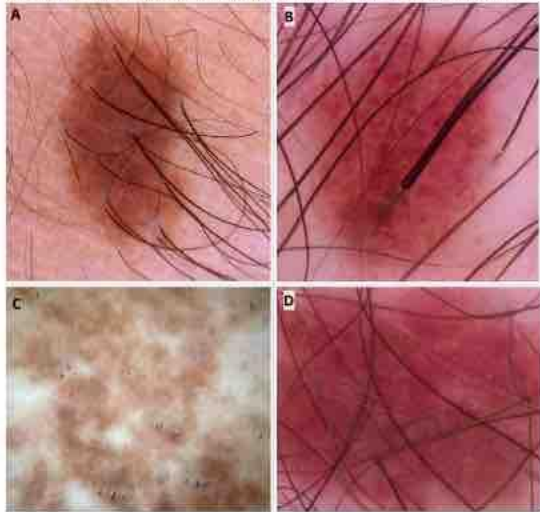

|         | Strongly disagree     | Disagree              | Neutral               | Agree                 | Strongly agree        |
|---------|-----------------------|-----------------------|-----------------------|-----------------------|-----------------------|
| Image A | <input type="radio"/> |
| Image B | <input type="radio"/> |
| Image C | <input type="radio"/> |
| Image D | <input type="radio"/> |

Congenital melanocytic nevi: Perifollicular hyper/hypopigmentation

Below, please rate EACH image on how strongly you agree that the image is representative of this structure.

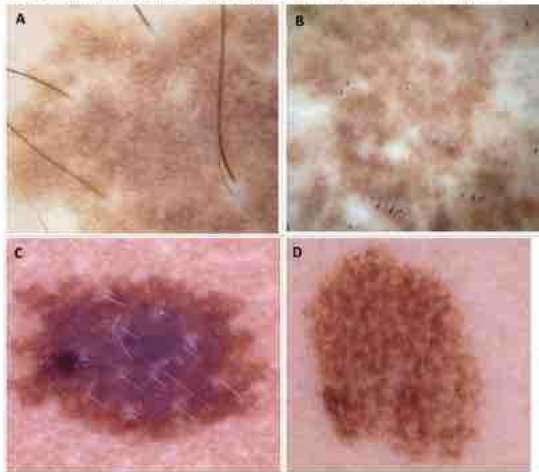

|         | Strongly disagree     | Disagree              | Neutral               | Agree                 | Strongly agree        |
|---------|-----------------------|-----------------------|-----------------------|-----------------------|-----------------------|
| Image A | <input type="radio"/> |
| Image B | <input type="radio"/> |
| Image C | <input type="radio"/> |
| Image D | <input type="radio"/> |

Please add any additional comments here

**BENIGN MELANOCYTIC: Intradermal nevus**

The following structures reached consensus for this diagnosis:  
 - Comma-shaped (curved) blood vessels  
 - Homogenous (structureless) brown/tan pigmentation

We would like to identify representative teaching images for each structure.

We will provide examples of images for each structure. Please rate how well you believe EACH image is representative of the indicated structure.

Intradermal nevus: Comma-shaped (curved) blood vessels

Below, please rate EACH image on how strongly you agree that the image is representative of this structure.

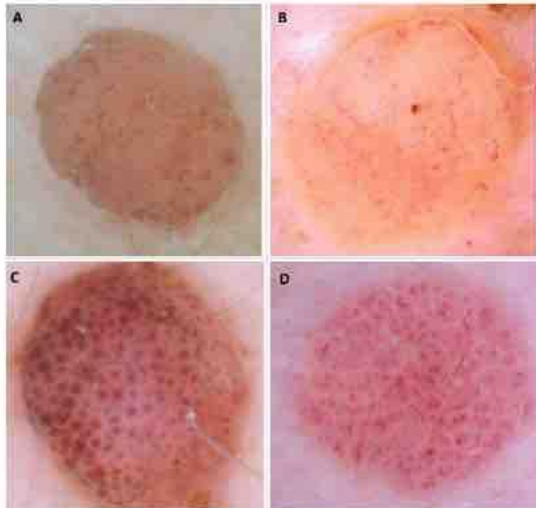

|         | Strongly disagree     | Disagree              | Neutral               | Agree                 | Strongly agree        |
|---------|-----------------------|-----------------------|-----------------------|-----------------------|-----------------------|
| Image A | <input type="radio"/> |
| Image B | <input type="radio"/> |
| Image C | <input type="radio"/> |
| Image D | <input type="radio"/> |

Intradermal nevus: Homogenous (structureless) brown / tan pigmentation

Below, please rate EACH image on how strongly you agree that the image is representative of this structure.

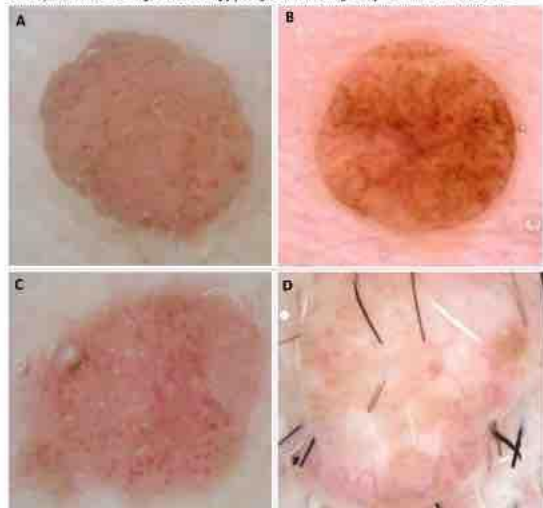

|         | Strongly disagree     | Disagree              | Neutral               | Agree                 | Strongly agree        |
|---------|-----------------------|-----------------------|-----------------------|-----------------------|-----------------------|
| Image A | <input type="radio"/> |
| Image B | <input type="radio"/> |
| Image C | <input type="radio"/> |
| Image D | <input type="radio"/> |

Please add any additional comments here.

\_\_\_\_\_

**BENIGN MELANOCYTIC: Blue nevi**

The following structure reached consensus for this diagnosis:  
 - Homogenous blue pigmentation

We would like to identify representative teaching images for this structure.

We will provide examples of images for this structure. Please rate how well you believe EACH image is representative of the indicated structure.

Blue nevi: Homogenous blue pigmentation

Below, please rate EACH image on how strongly you agree that the image is representative of this structure.

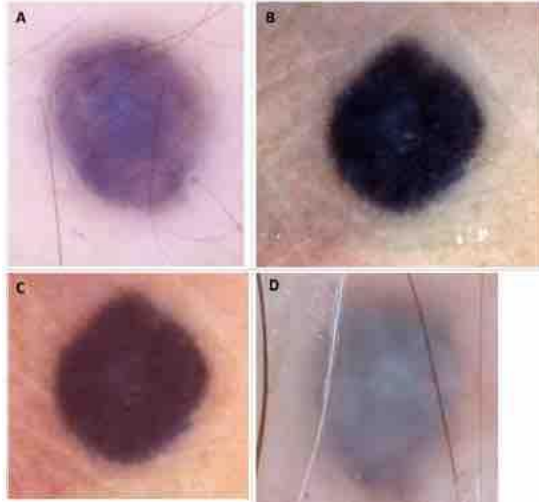

|         | Strongly disagree     | Disagree              | Neutral               | Agree                 | Strongly agree        |
|---------|-----------------------|-----------------------|-----------------------|-----------------------|-----------------------|
| Image A | <input type="radio"/> |
| Image B | <input type="radio"/> |
| Image C | <input type="radio"/> |
| Image D | <input type="radio"/> |

Please add any additional comments here:

**BENIGN MELANOCYTIC: Spitz nevi**

The following structures reached consensus for this diagnosis:

- Vascular pattern (pink homogenous with dotted vessels)
- Starburst pattern (with tiered globules / streaks) (radial streaming)
- Negative network (reticular depigmentation)
- White shiny lines (crystalline structures)

We would like to identify representative teaching images for each structure.

We will provide examples of images for each structure. Please rate how well you believe EACH image is representative of the indicated structure.

Spitz nevi: Vascular pattern (pink homogenous with dotted vessels)

Below, please rate EACH image on how strongly you agree that the image is representative of this structure.

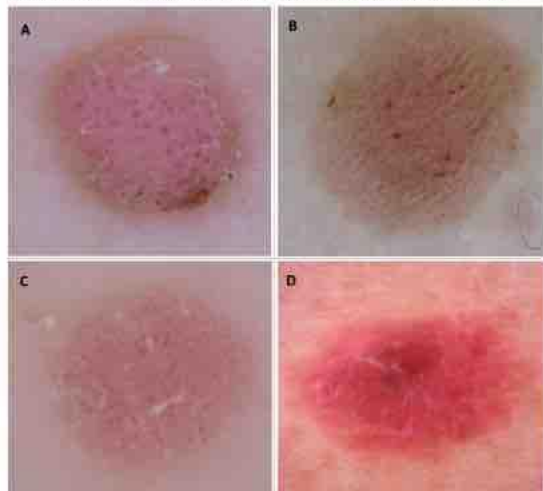

|         | Strongly disagree     | Disagree              | Neutral               | Agree                 | Strongly agree        |
|---------|-----------------------|-----------------------|-----------------------|-----------------------|-----------------------|
| Image A | <input type="radio"/> |
| Image B | <input type="radio"/> |
| Image C | <input type="radio"/> |
| Image D | <input type="radio"/> |

Spitz nevi: Starburst pattern (with tiered globules / streaks)(radial streaming)

Below, please rate EACH image on how strongly you agree that the image is representative of this structure.

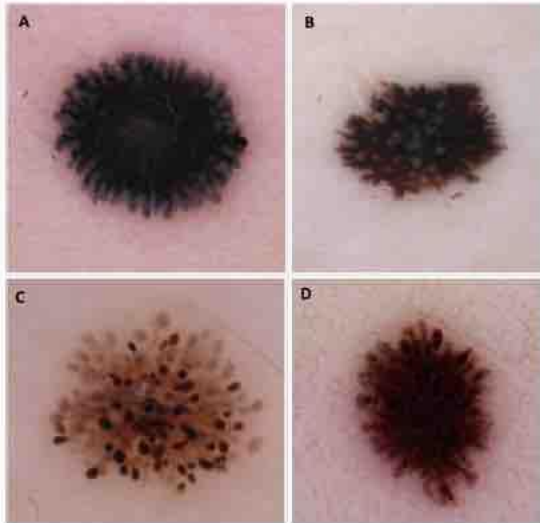

|         | Strongly disagree     | Disagree              | Neutral               | Agree                 | Strongly agree        |
|---------|-----------------------|-----------------------|-----------------------|-----------------------|-----------------------|
| Image A | <input type="radio"/> |
| Image B | <input type="radio"/> |
| Image C | <input type="radio"/> |
| Image D | <input type="radio"/> |

Spitz nevi: Negative network (reticular depigmentation)

Below, please rate EACH image on how strongly you agree that the image is representative of this structure.

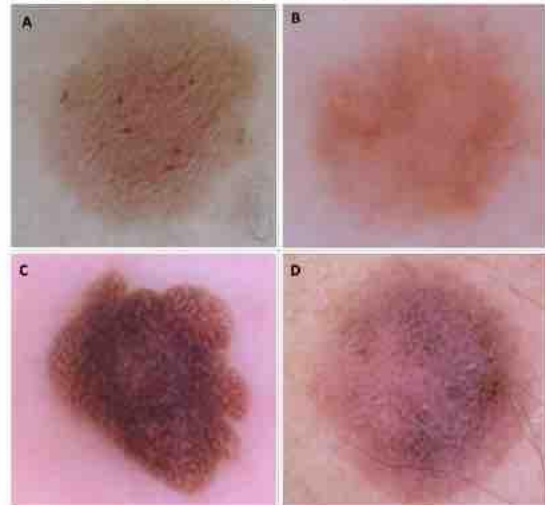

|         | Strongly disagree     | Disagree              | Neutral               | Agree                 | Strongly agree        |
|---------|-----------------------|-----------------------|-----------------------|-----------------------|-----------------------|
| Image A | <input type="radio"/> |
| Image B | <input type="radio"/> |
| Image C | <input type="radio"/> |
| Image D | <input type="radio"/> |

Spitz nevus: White shiny lines (crystalline structures)

Below, please rate EACH image on how strongly you agree that the image is representative of this structure.

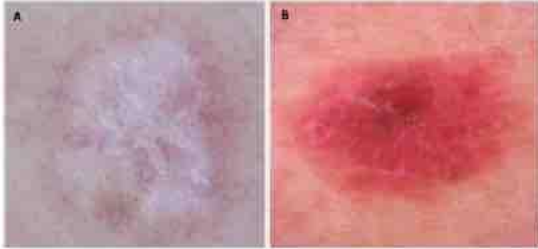

|         | Strongly disagree     | Disagree              | Neutral               | Agree                 | Strongly agree        |
|---------|-----------------------|-----------------------|-----------------------|-----------------------|-----------------------|
| Image A | <input type="radio"/> |
| Image B | <input type="radio"/> |

Please add any additional comments here.

**BENIGN MELANOCYTIC: Recurrent (persistent) nevus**

The following structure reached consensus for this diagnosis:

- Pigment within the scar, not extending beyond

We would like to identify representative teaching images for this structure.

We will provide examples of images for this structure. Please rate how well you believe EACH image is representative of the indicated structure.

Recurrent (persistent) nevus: Pigment within the scar, not extending beyond

Below, please rate EACH image on how strongly you agree that the image is representative of this structure.

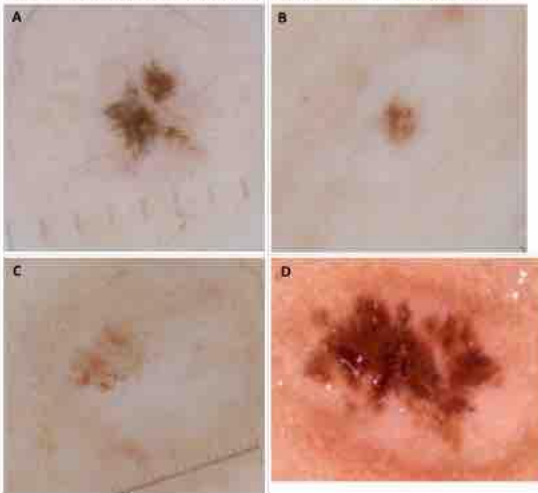

|         | Strongly disagree     | Disagree              | Neutral               | Agree                 | Strongly agree        |
|---------|-----------------------|-----------------------|-----------------------|-----------------------|-----------------------|
| Image A | <input type="radio"/> |
| Image B | <input type="radio"/> |
| Image C | <input type="radio"/> |
| Image D | <input type="radio"/> |

Please add any additional comments here.

**MELANOMA: Overview of melanoma characteristics**

The following structures reached consensus for this diagnosis:

- Atypical pigment network
- Blue structures (blue-white veil, blue-gray structures)
- Whiny shiny lines (crystalline structures)
- Negative network
- Irregular dots / globules
- Irregular streaks (radial streaming, pseudopods)
- Regression structures (white scar-like area and/or peppering)
- Peripheral brown structureless area
- Angulated lines (extrafacial)
- Atypical vascular pattern, polymorphous vessels (2+ types of blood vessels, e.g. linear irregular and dotted vessels)
- Atypical blotch

We would like to identify representative teaching images for each structure.

We will provide examples of images for each structure. Please rate how well you believe EACH image is representative of the indicated structure.

Overview of melanoma characteristics: Atypical pigment network

Below, please rate EACH image on how strongly you agree that the image is representative of this structure.

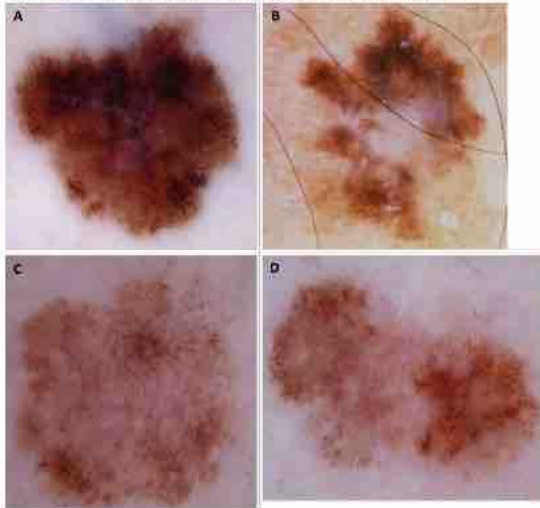

|         | Strongly disagree     | Disagree              | Neutral               | Agree                 | Strongly agree        |
|---------|-----------------------|-----------------------|-----------------------|-----------------------|-----------------------|
| Image A | <input type="radio"/> |
| Image B | <input type="radio"/> |
| Image C | <input type="radio"/> |
| Image D | <input type="radio"/> |



Overview of melanoma characteristics: Blue structures (blue white veil, blue-gray structures)

Below, please rate EACH image on how strongly you agree that the image is representative of this structure.

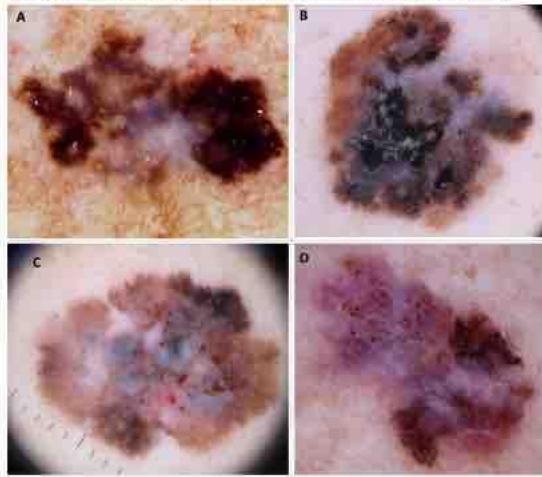

|         | Strongly disagree     | Disagree              | Neutral               | Agree                 | Strongly agree        |
|---------|-----------------------|-----------------------|-----------------------|-----------------------|-----------------------|
| Image A | <input type="radio"/> |
| Image B | <input type="radio"/> |
| Image C | <input type="radio"/> |
| Image D | <input type="radio"/> |

Overview of melanoma characteristics: White shiny lines (crystalline structures)

Below, please rate EACH image on how strongly you agree that the image is representative of this structure.

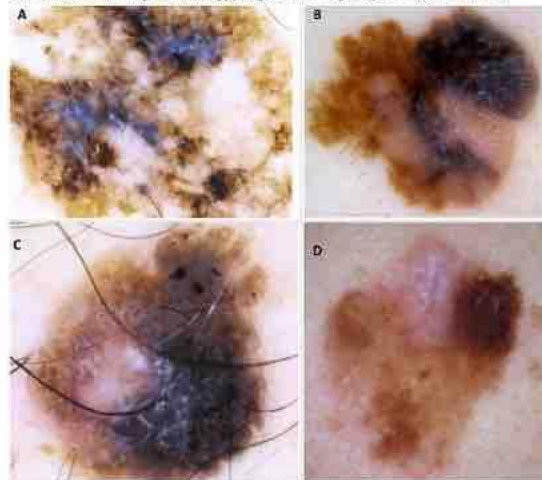

|         | Strongly disagree     | Disagree              | Neutral               | Agree                 | Strongly agree        |
|---------|-----------------------|-----------------------|-----------------------|-----------------------|-----------------------|
| Image A | <input type="radio"/> |
| Image B | <input type="radio"/> |
| Image C | <input type="radio"/> |
| Image D | <input type="radio"/> |

Overview of melanoma characteristics: Negative network

Below, please rate EACH image on how strongly you agree that the image is representative of this structure.

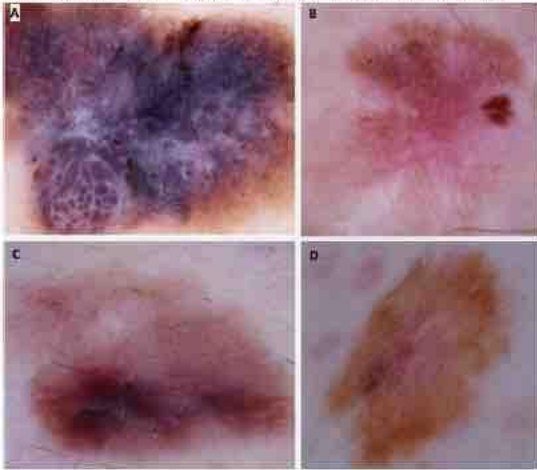

|         | Strongly disagree     | Disagree              | Neutral               | Agree                 | Strongly agree        |
|---------|-----------------------|-----------------------|-----------------------|-----------------------|-----------------------|
| Image A | <input type="radio"/> |
| Image B | <input type="radio"/> |
| Image C | <input type="radio"/> |
| Image D | <input type="radio"/> |

Overview of melanoma characteristics: Irregular dots / globules

Below, please rate EACH image on how strongly you agree that the image is representative of this structure.

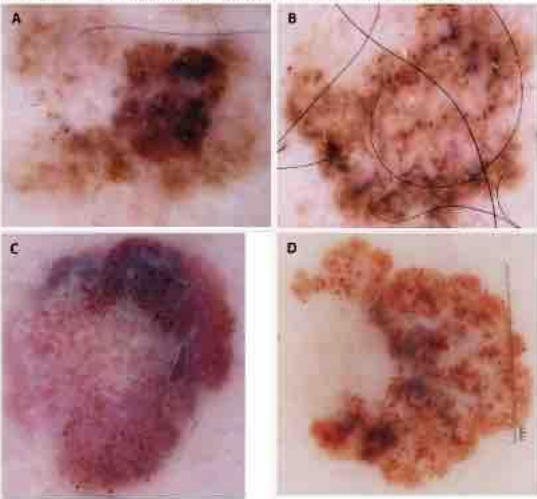

|         | Strongly disagree     | Disagree              | Neutral               | Agree                 | Strongly agree        |
|---------|-----------------------|-----------------------|-----------------------|-----------------------|-----------------------|
| Image A | <input type="radio"/> |
| Image B | <input type="radio"/> |
| Image C | <input type="radio"/> |
| Image D | <input type="radio"/> |

Overview of melanoma characteristics: Irregular streaks (radial streaming, pseudopods)

Below, please rate EACH image on how strongly you agree that the image is representative of this structure.

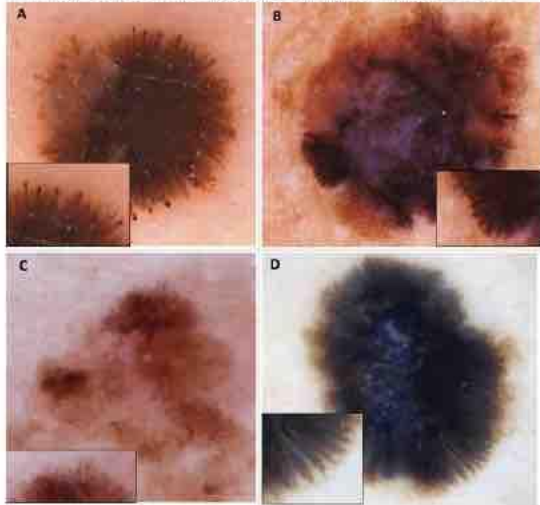

|         | Strongly disagree     | Disagree              | Neutral               | Agree                 | Strongly agree        |
|---------|-----------------------|-----------------------|-----------------------|-----------------------|-----------------------|
| Image A | <input type="radio"/> |
| Image B | <input type="radio"/> |
| Image C | <input type="radio"/> |
| Image D | <input type="radio"/> |

Overview of melanoma characteristics: Regression structures (white scar-like area and/or peppering)

Below, please rate EACH image on how strongly you agree that the image is representative of this structure.

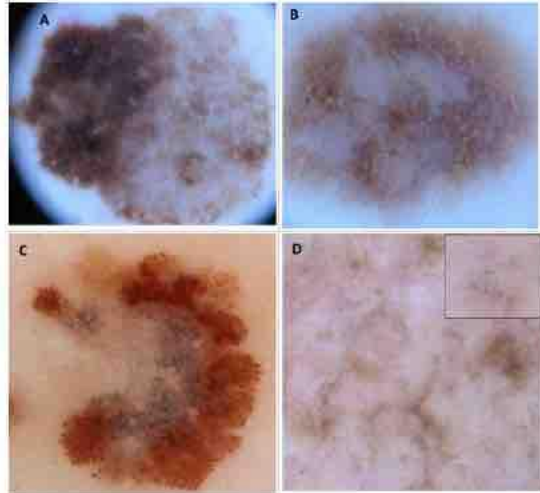

|         | Strongly disagree     | Disagree              | Neutral               | Agree                 | Strongly agree        |
|---------|-----------------------|-----------------------|-----------------------|-----------------------|-----------------------|
| Image A | <input type="radio"/> |
| Image B | <input type="radio"/> |
| Image C | <input type="radio"/> |
| Image D | <input type="radio"/> |

Overview of melanoma characteristics: Peripheral brown structureless area

Below, please rate EACH image on how strongly you agree that the image is representative of this structure.

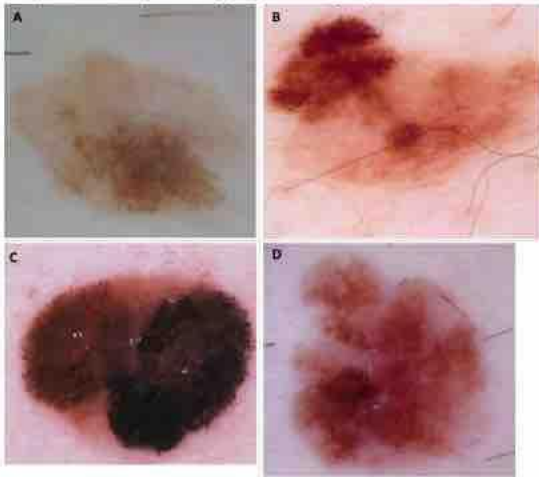

|         | Strongly disagree     | Disagree              | Neutral               | Agree                 | Strongly agree        |
|---------|-----------------------|-----------------------|-----------------------|-----------------------|-----------------------|
| Image A | <input type="radio"/> |
| Image B | <input type="radio"/> |
| Image C | <input type="radio"/> |
| Image D | <input type="radio"/> |

Overview of melanoma characteristics: Angulated lines (extrafacial)

Below, please rate EACH image on how strongly you agree that the image is representative of this structure.

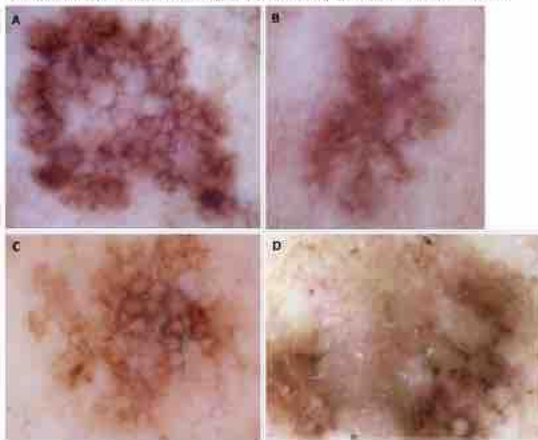

|         | Strongly disagree     | Disagree              | Neutral               | Agree                 | Strongly agree        |
|---------|-----------------------|-----------------------|-----------------------|-----------------------|-----------------------|
| Image A | <input type="radio"/> |
| Image B | <input type="radio"/> |
| Image C | <input type="radio"/> |
| Image D | <input type="radio"/> |

Overview of melanoma characteristics: Atypical vascular pattern; polymorphous vessels (2+ types of blood vessels, e.g. linear irregular and dotted vessels)

Below, please rate EACH image on how strongly you agree that the image is representative of this structure.

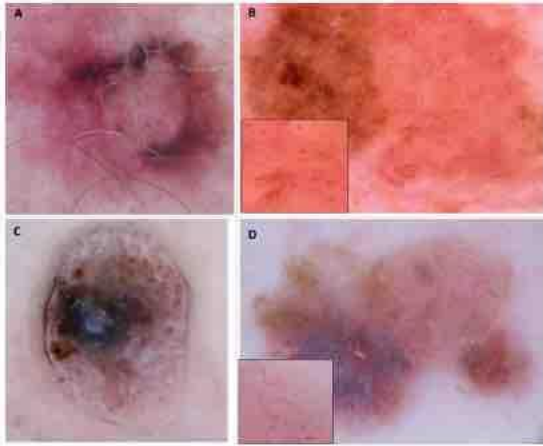

|         | Strongly disagree     | Disagree              | Neutral               | Agree                 | Strongly agree        |
|---------|-----------------------|-----------------------|-----------------------|-----------------------|-----------------------|
| Image A | <input type="radio"/> |
| Image B | <input type="radio"/> |
| Image C | <input type="radio"/> |
| Image D | <input type="radio"/> |

Overview of melanoma characteristics: Atypical blotch

Below, please rate EACH image on how strongly you agree that the image is representative of this structure.

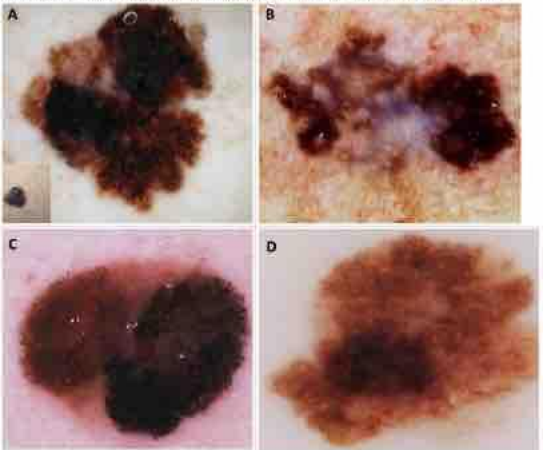

|         | Strongly disagree     | Disagree              | Neutral               | Agree                 | Strongly agree        |
|---------|-----------------------|-----------------------|-----------------------|-----------------------|-----------------------|
| Image A | <input type="radio"/> |
| Image B | <input type="radio"/> |
| Image C | <input type="radio"/> |
| Image D | <input type="radio"/> |

Please add any additional comments here.

\_\_\_\_\_

**MELANOMA: Acral lentiginous melanoma**

The following structures reached consensus for this diagnosis:

- Parallel ridge pattern
- Irregular diffuse pigmentation
- Multicomponent pattern
- Atypical fibrillar pattern

We would like to identify representative teaching images for each structure.

We will provide examples of images for each structure. Please rate how well you believe EACH image is representative of the indicated structure.

Acral lentiginous melanoma: Parallel ridge pattern

Below, please rate EACH image on how strongly you agree that the image is representative of this structure.

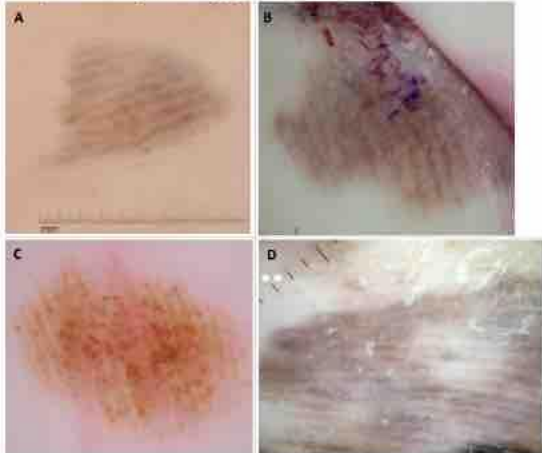

|         | Strongly disagree     | Disagree              | Neutral               | Agree                 | Strongly agree        |
|---------|-----------------------|-----------------------|-----------------------|-----------------------|-----------------------|
| Image A | <input type="radio"/> |
| Image B | <input type="radio"/> |
| Image C | <input type="radio"/> |
| Image D | <input type="radio"/> |

Acral lentiginous melanoma: Irregular diffuse pigmentation

Below, please rate EACH image on how strongly you agree that the image is representative of this structure.

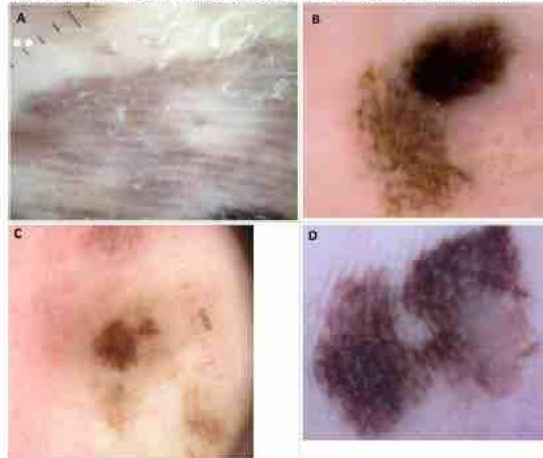

|         | Strongly disagree     | Disagree              | Neutral               | Agree                 | Strongly agree        |
|---------|-----------------------|-----------------------|-----------------------|-----------------------|-----------------------|
| Image A | <input type="radio"/> |
| Image B | <input type="radio"/> |
| Image C | <input type="radio"/> |
| Image D | <input type="radio"/> |

Acral lentiginous melanoma: Multicomponent pattern

Below, please rate EACH image on how strongly you agree that the image is representative of this structure.

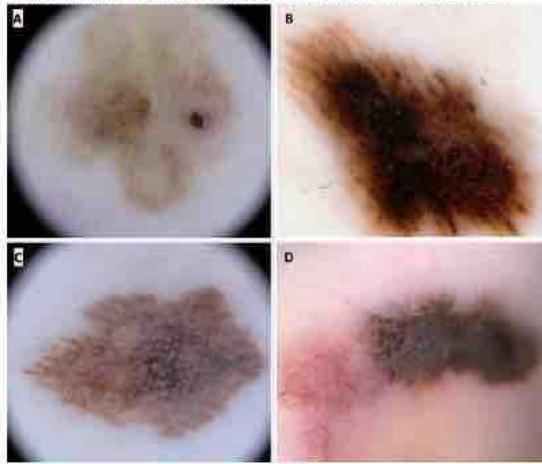

|         | Strongly disagree     | Disagree              | Neutral               | Agree                 | Strongly agree        |
|---------|-----------------------|-----------------------|-----------------------|-----------------------|-----------------------|
| Image A | <input type="radio"/> |
| Image B | <input type="radio"/> |
| Image C | <input type="radio"/> |
| Image D | <input type="radio"/> |

Acral lentiginous melanoma: Atypical fibrillar pattern

Below, please rate EACH image on how strongly you agree that the image is representative of this structure.

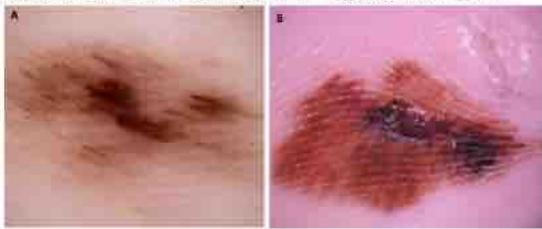

|         | Strongly disagree     | Disagree              | Neutral               | Agree                 | Strongly agree        |
|---------|-----------------------|-----------------------|-----------------------|-----------------------|-----------------------|
| Image A | <input type="radio"/> |
| Image B | <input type="radio"/> |

Please add any additional comments here.

\_\_\_\_\_

**MELANOMA: Lentigo maligna melanoma (melanoma on chronically sun-damaged skin of head/neck)**

- The following structures reached consensus for this diagnosis:
- Annular-granular pattern (gray dots around follicular openings)
  - Asymmetric pigmentation around follicular openings
  - Rhomboidal structures (angulated lines)
  - Circle within a circle (isobar)
  - Dark blotches with or without obliterated hair follicles

We would like to identify representative teaching images for each structure.

We will provide examples of images for each structure. Please rate how well you believe EACH image is representative of the indicated structure.

Lentigo maligna melanoma: Annular-granular pattern (gray dots around follicular openings)

Below, please rate EACH image on how strongly you agree that the image is representative of this structure.

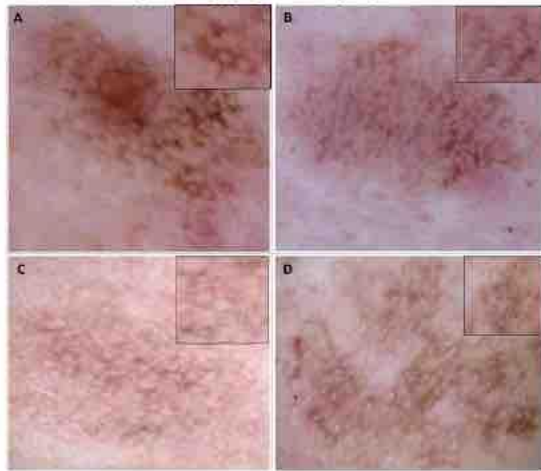

|         | Strongly disagree     | Disagree              | Neutral               | Agree                 | Strongly agree        |
|---------|-----------------------|-----------------------|-----------------------|-----------------------|-----------------------|
| Image A | <input type="radio"/> |
| Image B | <input type="radio"/> |
| Image C | <input type="radio"/> |
| Image D | <input type="radio"/> |

Lentigo maligna melanoma: Asymmetric pigmentation around follicular openings

Below, please rate EACH image on how strongly you agree that the image is representative of this structure.

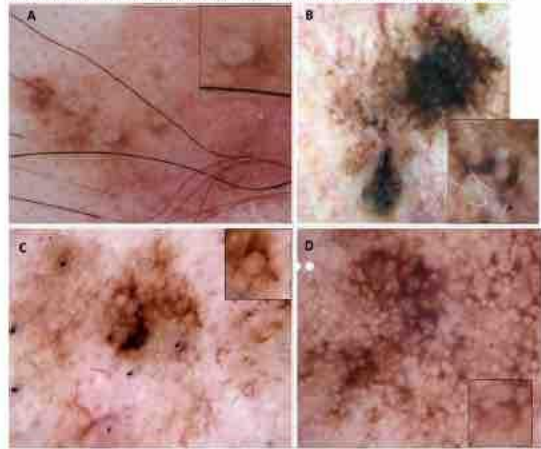

|         | Strongly disagree     | Disagree              | Neutral               | Agree                 | Strongly agree        |
|---------|-----------------------|-----------------------|-----------------------|-----------------------|-----------------------|
| Image A | <input type="radio"/> |
| Image B | <input type="radio"/> |
| Image C | <input type="radio"/> |
| Image D | <input type="radio"/> |



Lentigo maligna melanoma: Rhomboidal structures (angulated lines)

Below, please rate EACH image on how strongly you agree that the image is representative of this structure.

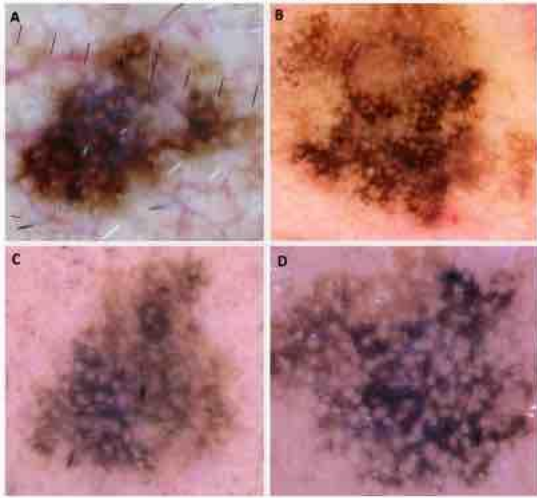

|         | Strongly disagree     | Disagree              | Neutral               | Agree                 | Strongly agree        |
|---------|-----------------------|-----------------------|-----------------------|-----------------------|-----------------------|
| Image A | <input type="radio"/> |
| Image B | <input type="radio"/> |
| Image C | <input type="radio"/> |
| Image D | <input type="radio"/> |

Lentigo maligna melanoma: Circle within a circle (isobar)

Below, please rate EACH image on how strongly you agree that the image is representative of this structure.

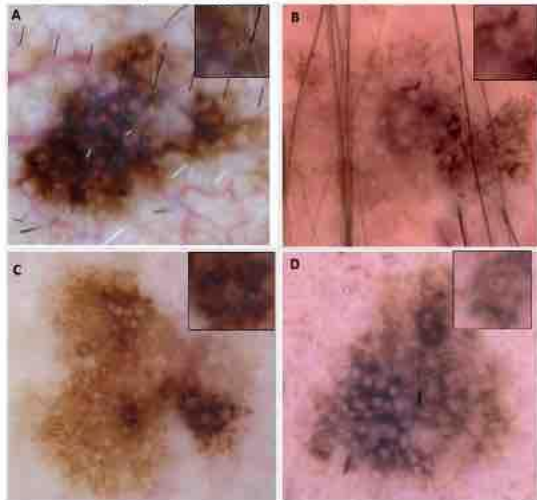

|         | Strongly disagree     | Disagree              | Neutral               | Agree                 | Strongly agree        |
|---------|-----------------------|-----------------------|-----------------------|-----------------------|-----------------------|
| Image A | <input type="radio"/> |
| Image B | <input type="radio"/> |
| Image C | <input type="radio"/> |
| Image D | <input type="radio"/> |

Lentigo maligna melanoma: Dark blotches with or without obliterated hair follicles.

Below, please rate EACH image on how strongly you agree that the image is representative of this structure.

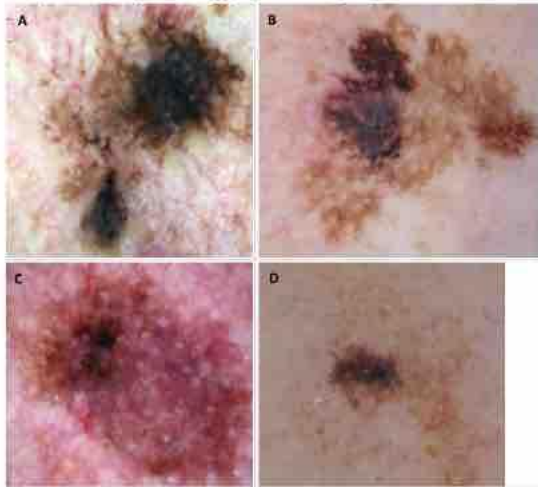

|         | Strongly disagree     | Disagree              | Neutral               | Agree                 | Strongly agree        |
|---------|-----------------------|-----------------------|-----------------------|-----------------------|-----------------------|
| Image A | <input type="radio"/> |
| Image B | <input type="radio"/> |
| Image C | <input type="radio"/> |
| Image D | <input type="radio"/> |

Please add any additional comments here.

**MELANOMA: Amelanotic melanoma**

The following structures reached consensus for this diagnosis:

- Scar-like depigmentation
- Milky red areas
- White shiny lines (crystalline structures)
- Atypical vascular pattern, polymorphous vessels (2+ types of blood vessels, e.g. linear irregular and dotted vessels)

We would like to identify representative teaching images for each structure.

We will provide examples of images for each structure. Please rate how well you believe EACH image is representative of the indicated structure.

Amelanotic melanoma: Scar-like depigmentation

Below, please rate EACH image on how strongly you agree that the image is representative of this structure.

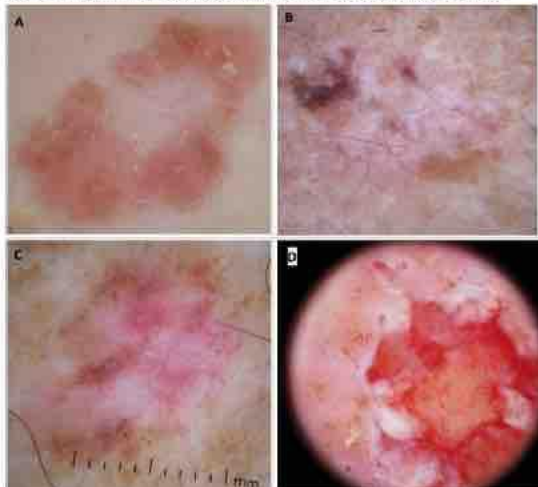

|         | Strongly disagree                | Disagree              | Neutral               | Agree                 | Strongly agree        |
|---------|----------------------------------|-----------------------|-----------------------|-----------------------|-----------------------|
| Image A | <input checked="" type="radio"/> | <input type="radio"/> | <input type="radio"/> | <input type="radio"/> | <input type="radio"/> |
| Image B | <input type="radio"/>            | <input type="radio"/> | <input type="radio"/> | <input type="radio"/> | <input type="radio"/> |
| Image C | <input type="radio"/>            | <input type="radio"/> | <input type="radio"/> | <input type="radio"/> | <input type="radio"/> |
| Image D | <input type="radio"/>            | <input type="radio"/> | <input type="radio"/> | <input type="radio"/> | <input type="radio"/> |

Amelanotic melanoma: Scar-like depigmentation (additional image)

Below, please rate EACH image on how strongly you agree that the image is representative of this structure.

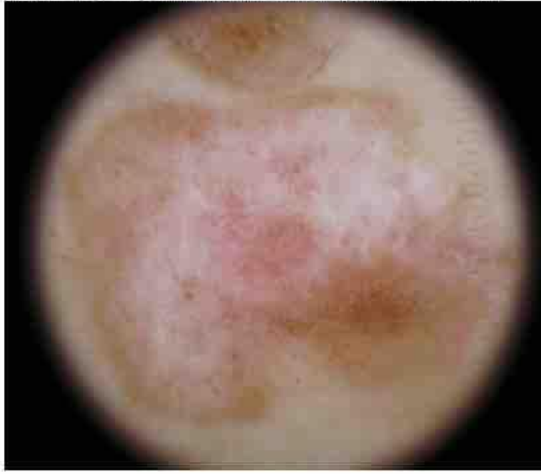

|                  | Strongly disagree     | Disagree              | Neutral               | Agree                 | Strongly agree        |
|------------------|-----------------------|-----------------------|-----------------------|-----------------------|-----------------------|
| Additional Image | <input type="radio"/> |

Amelanotic melanoma: Milky red areas

Below, please rate EACH image on how strongly you agree that the image is representative of this structure.

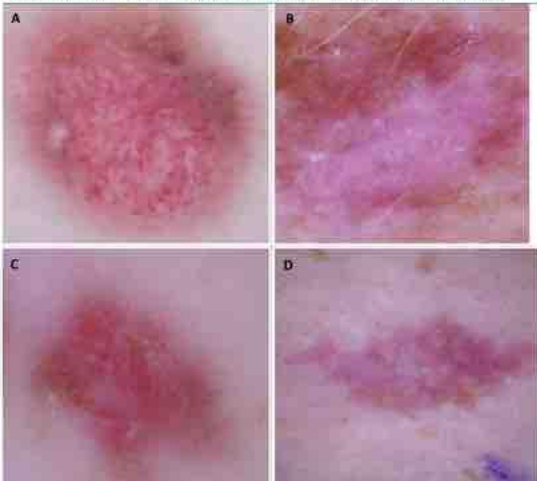

|         | Strongly disagree     | Disagree              | Neutral               | Agree                 | Strongly agree        |
|---------|-----------------------|-----------------------|-----------------------|-----------------------|-----------------------|
| Image A | <input type="radio"/> |
| Image B | <input type="radio"/> |
| Image C | <input type="radio"/> |
| Image D | <input type="radio"/> |

Amelanotic melanoma: White shiny lines (crystalline structures)

Below, please rate EACH image on how strongly you agree that the image is representative of this structure.

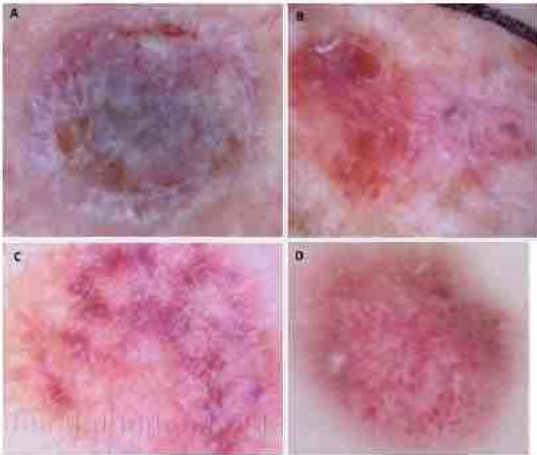

|         | Strongly disagree     | Disagree              | Neutral               | Agree                 | Strongly agree        |
|---------|-----------------------|-----------------------|-----------------------|-----------------------|-----------------------|
| Image A | <input type="radio"/> |
| Image B | <input type="radio"/> |
| Image C | <input type="radio"/> |
| Image D | <input type="radio"/> |

Amelanotic melanoma: Atypical vascular pattern, polymorphous vessels (2+ types of blood vessels, e.g. linear irregular and dotted vessels)

Below, please rate EACH image on how strongly you agree that the image is representative of this structure.

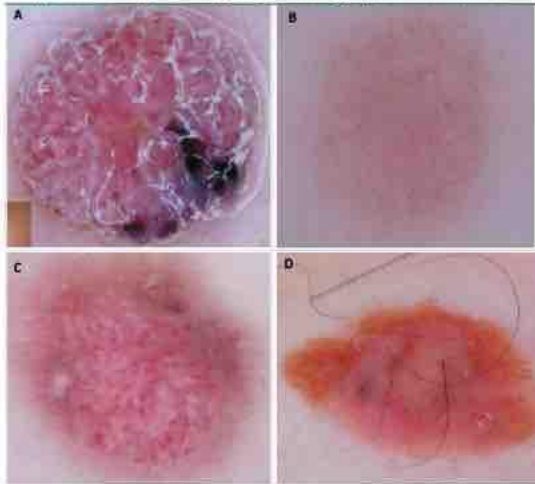

|         | Strongly disagree     | Disagree              | Neutral               | Agree                 | Strongly agree        |
|---------|-----------------------|-----------------------|-----------------------|-----------------------|-----------------------|
| Image A | <input type="radio"/> |
| Image B | <input type="radio"/> |
| Image C | <input type="radio"/> |
| Image D | <input type="radio"/> |

Please add any additional comments here.

\_\_\_\_\_

**SPECIAL SITES / OTHER: Dermoscopic features of the face**

The following structure reached consensus for this diagnosis:

- Pseudonetwork pattern

We would like to identify representative teaching images for this structure.

We will provide examples of images for this structure. Please rate how well you believe EACH image is representative of the indicated structure.

Dermoscopic features of the face: Pseudonetwork pattern

Below, please rate EACH image on how strongly you agree that the image is representative of this structure.

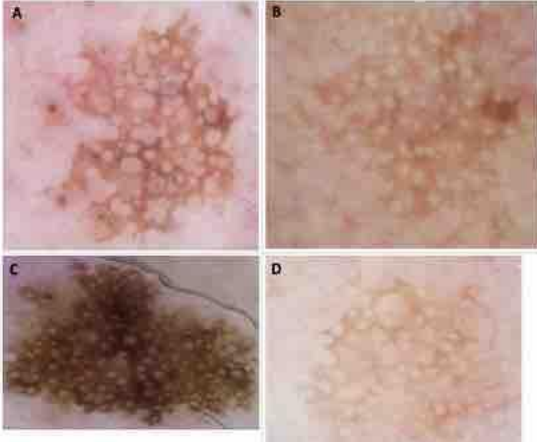

**SPECIAL SITES / OTHER: Benign patterns of acral nevus**

The following structures reached consensus for this diagnosis:

- Parallel furrow pattern (with pattern variations including single line, double line, single dotted line, double dotted line)

- Lattice-like pattern

- Fibrillar pattern (soles only)

- Homogenous pattern

- Peas in a pod pattern (parallel furrow + globules on ridges) (congenital nevus)

We would like to identify representative teaching images for each structure.

We will provide examples of images for each structure. Please rate how well you believe EACH image is representative of the indicated structure.

Benign patterns of acral nevus: Parallel furrow pattern (with pattern variations including single line, double line, single dotted line, double dotted line)

Below, please rate EACH image on how strongly you agree that the image is representative of this structure.

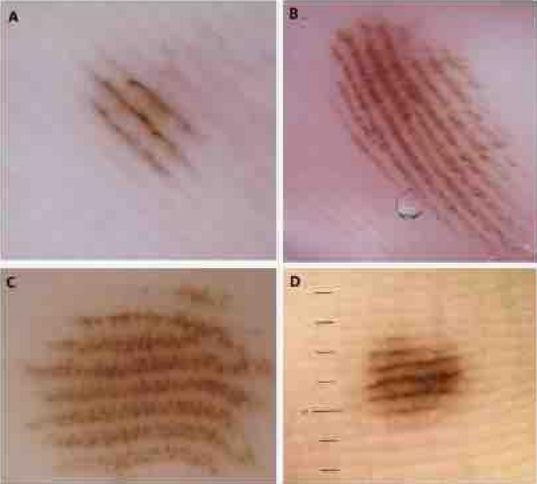

|         | Strongly disagree     | Disagree              | Neutral               | Agree                 | Strongly agree        |
|---------|-----------------------|-----------------------|-----------------------|-----------------------|-----------------------|
| Image A | <input type="radio"/> |
| Image B | <input type="radio"/> |
| Image C | <input type="radio"/> |
| Image D | <input type="radio"/> |

Benign patterns of acral nevi: Lattice-like pattern

Below, please rate EACH image on how strongly you agree that the image is representative of this structure.

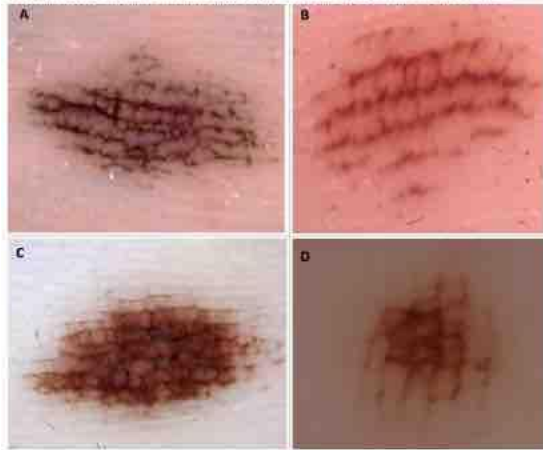

|         | Strongly disagree     | Disagree              | Neutral               | Agree                 | Strongly agree        |
|---------|-----------------------|-----------------------|-----------------------|-----------------------|-----------------------|
| Image A | <input type="radio"/> |
| Image B | <input type="radio"/> |
| Image C | <input type="radio"/> |
| Image D | <input type="radio"/> |

Benign patterns of acral nevi: Fibrillar pattern (soles only)

Below, please rate EACH image on how strongly you agree that the image is representative of this structure.

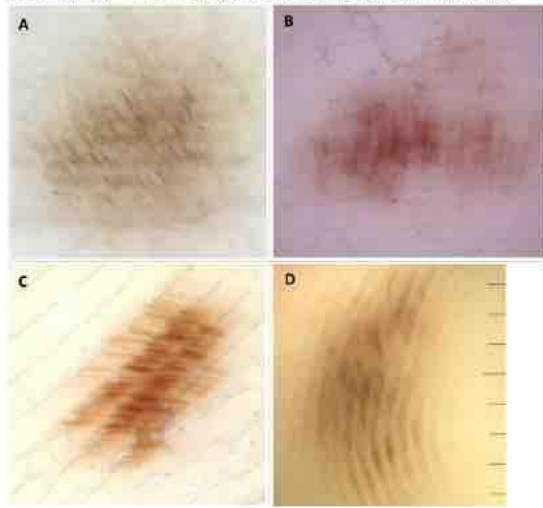

|         | Strongly disagree     | Disagree              | Neutral               | Agree                 | Strongly agree        |
|---------|-----------------------|-----------------------|-----------------------|-----------------------|-----------------------|
| Image A | <input type="radio"/> |
| Image B | <input type="radio"/> |
| Image C | <input type="radio"/> |
| Image D | <input type="radio"/> |

Benign patterns of acral nevi: Homogenous pattern

Below, please rate EACH image on how strongly you agree that the image is representative of this structure.

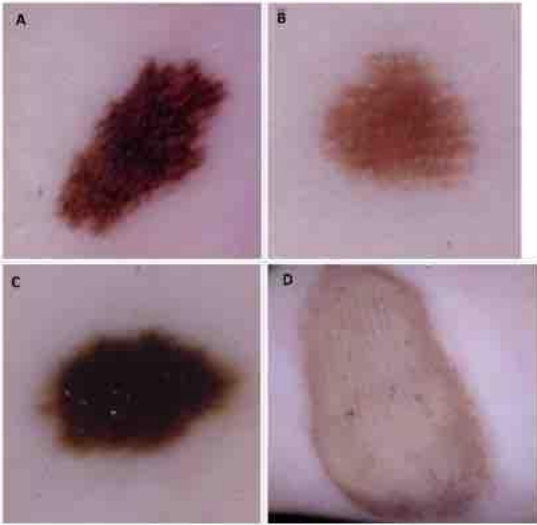

|         | Strongly disagree     | Disagree              | Neutral               | Agree                 | Strongly agree        |
|---------|-----------------------|-----------------------|-----------------------|-----------------------|-----------------------|
| Image A | <input type="radio"/> |
| Image B | <input type="radio"/> |
| Image C | <input type="radio"/> |
| Image D | <input type="radio"/> |

page 2/4

Benign patterns of acral nevi: Peas in a pod pattern (parallel furrow + globules on ridges) (congenital nevi)

Below, please rate EACH image on how strongly you agree that the image is representative of this structure.

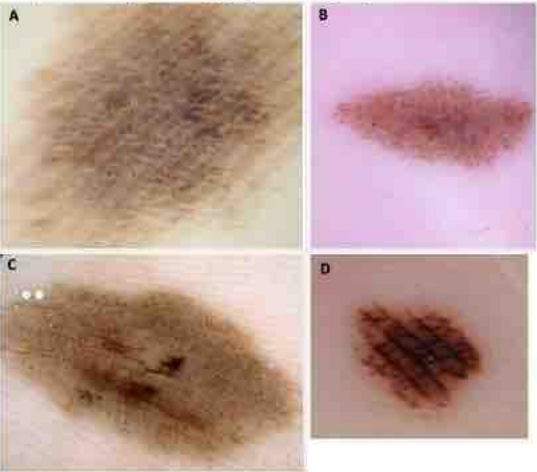

|         | Strongly disagree     | Disagree              | Neutral               | Agree                 | Strongly agree        |
|---------|-----------------------|-----------------------|-----------------------|-----------------------|-----------------------|
| Image A | <input type="radio"/> |
| Image B | <input type="radio"/> |
| Image C | <input type="radio"/> |
| Image D | <input type="radio"/> |

Please add any additional comments here.

\_\_\_\_\_

**SPECIAL SITES / OTHER: Nevus of the nail**

The following structures reached consensus for this diagnosis:

- Homogenous brown background coloration
- Uniform band thickness, color, and spacing with parallel band configuration

We would like to identify representative teaching images for each structure.

We will provide examples of images for each structure. Please rate how well you believe EACH image is representative of the indicated structure.

Nevus of the nail: Homogenous brown background coloration

Below, please rate EACH image on how strongly you agree that the image is representative of this structure.

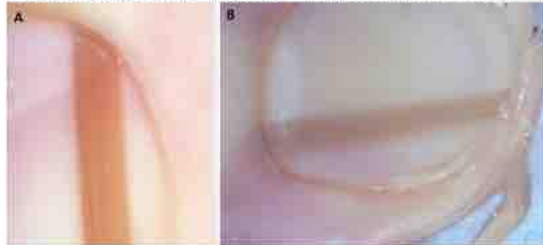

|         | Strongly disagree     | Disagree              | Neutral               | Agree                 | Strongly agree        |
|---------|-----------------------|-----------------------|-----------------------|-----------------------|-----------------------|
| Image A | <input type="radio"/> |
| Image B | <input type="radio"/> |

**SPECIAL SITES / OTHER: Lentigo of the nail (melanotic macule of the nail)**

The following structure reached consensus for this diagnosis:

- Multiple thin homogenous gray lines (or single gray band) +/- gray background

We would like to identify representative teaching images for this structure.

We will provide examples of images for this structure. Please rate how well you believe EACH image is representative of the indicated structure.

Lentigo of the nail (melanotic macule of the nail): Multiple thin homogenous gray lines (or single gray band) +/- gray background

Below, please rate EACH image on how strongly you agree that the image is representative of this structure.

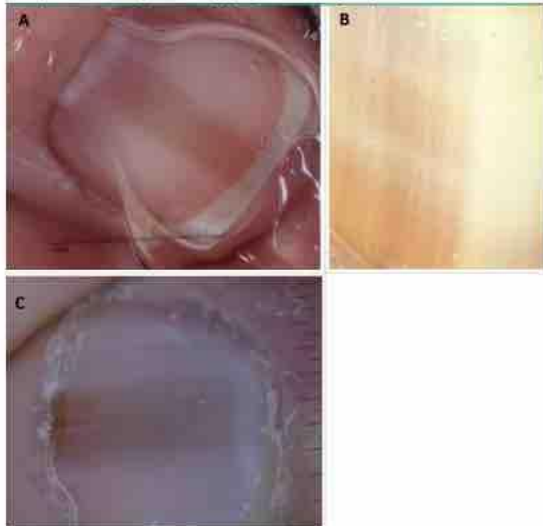

|         | Strongly disagree     | Disagree              | Neutral               | Agree                 | Strongly agree        |
|---------|-----------------------|-----------------------|-----------------------|-----------------------|-----------------------|
| Image A | <input type="radio"/> |
| Image B | <input type="radio"/> |
| Image C | <input type="radio"/> |

Please add any additional comments here.

Nevus of the nail: Uniform band thickness, color, and spacing with parallel band configuration

Below, please rate EACH image on how strongly you agree that the image is representative of this structure.

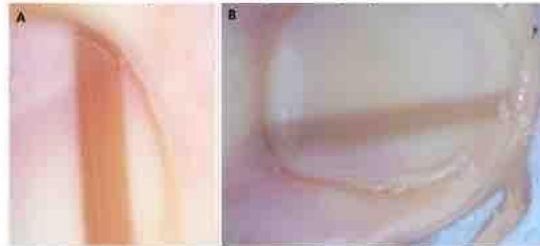

|         | Strongly disagree     | Disagree              | Neutral               | Agree                 | Strongly agree        |
|---------|-----------------------|-----------------------|-----------------------|-----------------------|-----------------------|
| Image A | <input type="radio"/> |
| Image B | <input type="radio"/> |

Please add any additional comments here.



**SPECIAL SITES / OTHER: Melanoma of the nail**

The following structures reached consensus for this diagnosis:

- Triangular shape of pigment band (band diameter wider at proximal end)
- Pigmentation of periungual skin (micro-Hutchinson's sign)
- Brown to black dots/globules associated with longitudinal lines
- Longitudinal brown/black lines with irregular spacing, width, color, or parallelism
- Band width >3mm or >2/3 nail plate width

We would like to identify representative teaching images for each structure.

We will provide examples of images for each structure. Please rate how well you believe EACH image is representative of the indicated structure.

Melanoma of the nail: Triangular shape of pigment band (band diameter wider at proximal end)

Below, please rate EACH image on how strongly you agree that the image is representative of this structure.

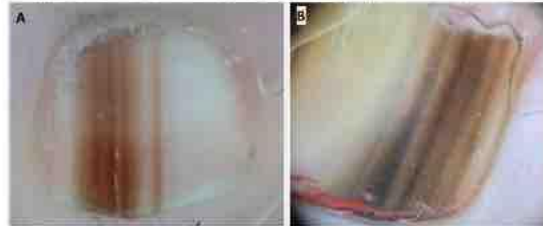

|         | Strongly disagree     | Disagree              | Neutral               | Agree                 | Strongly agree        |
|---------|-----------------------|-----------------------|-----------------------|-----------------------|-----------------------|
| Image A | <input type="radio"/> |
| Image B | <input type="radio"/> |

Melanoma of the nail: Pigmentation of periungual skin (micro-Hutchinson's sign)

Below, please rate EACH image on how strongly you agree that the image is representative of this structure.

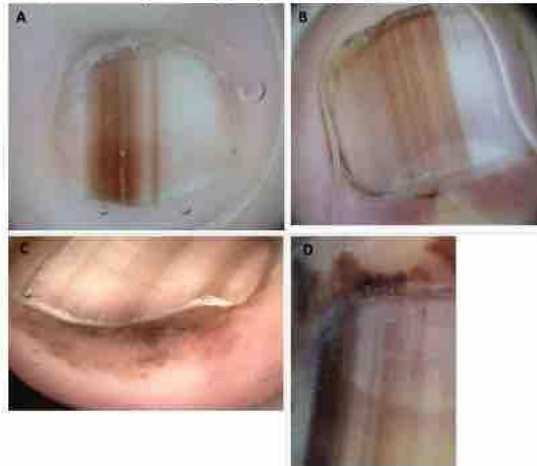

|         | Strongly disagree     | Disagree              | Neutral               | Agree                 | Strongly agree        |
|---------|-----------------------|-----------------------|-----------------------|-----------------------|-----------------------|
| Image A | <input type="radio"/> |
| Image B | <input type="radio"/> |
| Image C | <input type="radio"/> |
| Image D | <input type="radio"/> |

Melanoma of the nail: Brown to black dots/globules associated with longitudinal lines

Below, please rate EACH image on how strongly you agree that the image is representative of this structure.

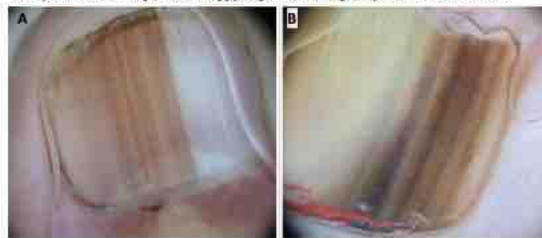

|         | Strongly disagree     | Disagree              | Neutral               | Agree                 | Strongly agree        |
|---------|-----------------------|-----------------------|-----------------------|-----------------------|-----------------------|
| Image A | <input type="radio"/> |
| Image B | <input type="radio"/> |

Melanoma of the nail: Longitudinal brown/black lines with irregular spacing, width, color, or parallelism

Below, please rate EACH image on how strongly you agree that the image is representative of this structure.

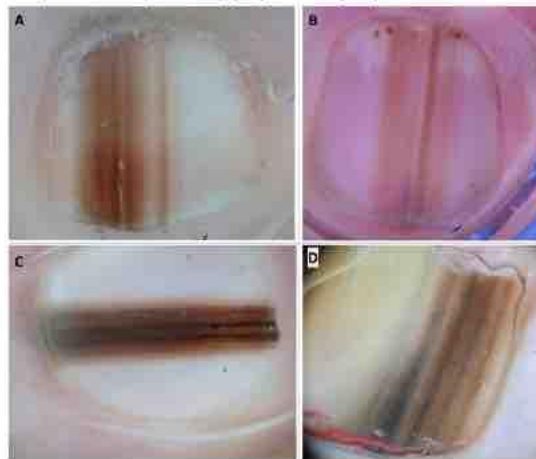

|         | Strongly disagree     | Disagree              | Neutral               | Agree                 | Strongly agree        |
|---------|-----------------------|-----------------------|-----------------------|-----------------------|-----------------------|
| Image A | <input type="radio"/> |
| Image B | <input type="radio"/> |
| Image C | <input type="radio"/> |
| Image D | <input type="radio"/> |

Melanoma of the nail: Band width >3mm or >2/3 of nail plate width

Below, please rate EACH image on how strongly you agree that the image is representative of this structure.

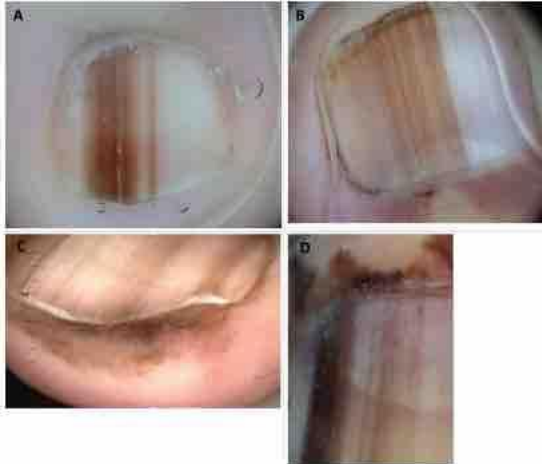

|         | Strongly disagree     | Disagree              | Neutral               | Agree                 | Strongly agree        |
|---------|-----------------------|-----------------------|-----------------------|-----------------------|-----------------------|
| Image A | <input type="radio"/> |
| Image B | <input type="radio"/> |
| Image C | <input type="radio"/> |
| Image D | <input type="radio"/> |

Please add any additional comments here.

**SPECIAL SITES / OTHER: Subungual hemorrhage**

The following structures reached consensus for this diagnosis:

- Well circumscribed red-black dots or blotches
- Distal streaks of red-brown coloration ("filamentous" distal end)
- Homogenous red/purple/black coloration without melanin granules

We would like to identify representative teaching images for each structure.

We will provide examples of images for each structure. Please rate how well you believe EACH image is representative of the indicated structure.

Subungual hemorrhage: Well circumscribed red-black dots or blotches

Below, please rate EACH image on how strongly you agree that the image is representative of this structure.

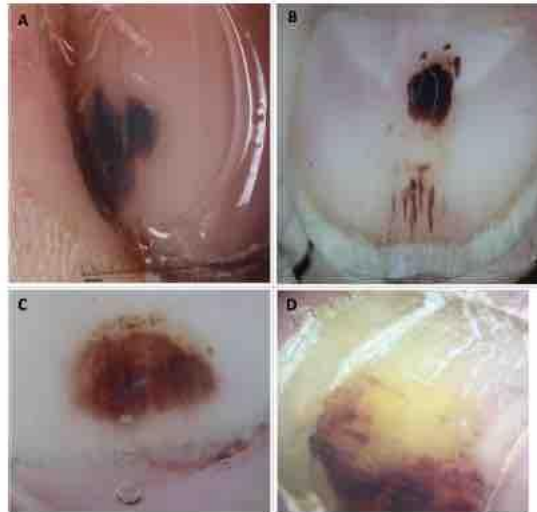

Subungual hemorrhage: Homogenous red/purple/black coloration without melanin granules

Below, please rate EACH image on how strongly you agree that the image is representative of this structure.

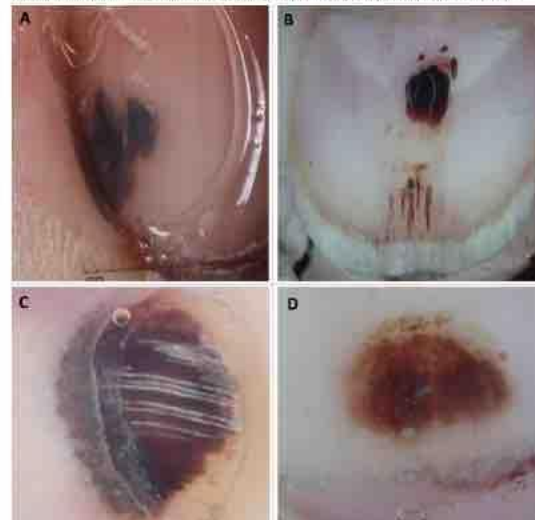

|         | Strongly disagree     | Disagree              | Neutral               | Agree                 | Strongly agree        |
|---------|-----------------------|-----------------------|-----------------------|-----------------------|-----------------------|
| Image A | <input type="radio"/> |
| Image B | <input type="radio"/> |
| Image C | <input type="radio"/> |
| Image D | <input type="radio"/> |

Please add any additional comments here.

Page 133

|         | Strongly disagree     | Disagree              | Neutral               | Agree                 | Strongly agree        |
|---------|-----------------------|-----------------------|-----------------------|-----------------------|-----------------------|
| Image A | <input type="radio"/> |
| Image B | <input type="radio"/> |
| Image C | <input type="radio"/> |
| Image D | <input type="radio"/> |

Subungual hemorrhage: Distal streaks of red-brown coloration ("filamentous" distal end)

Below, please rate EACH image on how strongly you agree that the image is representative of this structure.

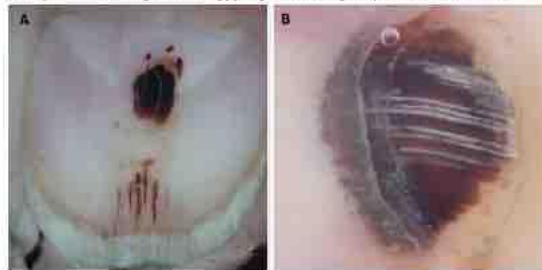

|         | Strongly disagree     | Disagree              | Neutral               | Agree                 | Strongly agree        |
|---------|-----------------------|-----------------------|-----------------------|-----------------------|-----------------------|
| Image A | <input type="radio"/> |
| Image B | <input type="radio"/> |
| Image C | <input type="radio"/> |
| Image D | <input type="radio"/> |

**SPECIAL SITES / OTHER: Scabies**

The following structures reached consensus for this diagnosis:

- Delta-wing jet with contrail sign (small dark brown triangular structure located at the end of whitish structureless curved / wavy lines)

We would like to identify representative teaching images for each structure.

We will provide examples of images for each structure. Please rate how well you believe EACH image is representative of the indicated structure.

Scabies: Delta wing jet with contrail sign (small dark brown triangular structure located at the end of whitish structureless curved / wavy lines)

Below, please rate EACH image on how strongly you agree that the image is representative of this structure.

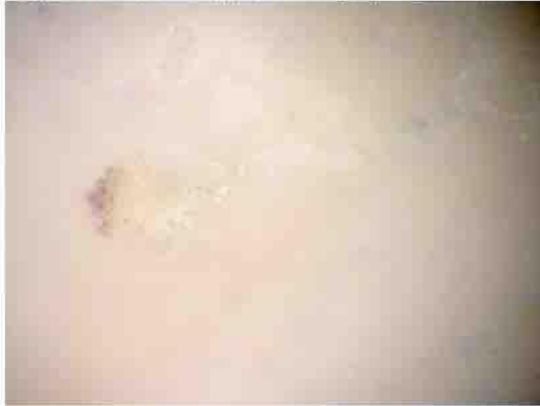

|         | Strongly disagree     | Disagree              | Neutral               | Agree                 | Strongly agree        |
|---------|-----------------------|-----------------------|-----------------------|-----------------------|-----------------------|
| Image A | <input type="radio"/> |

Please add any additional comments here.

## DERMOSCOPIC IMAGES: ROUND 2

For each dermatologic diagnosis, we would like to determine if the following dermoscopic images can be considered classic teaching images, and if they demonstrate good examples of associated dermoscopic structures.

To ensure agreement on representative teaching images for each structure, we have provided the percentage of panelists who voted "agree" or "strongly agree" for each. Images with < 70% positive votes did not reach preliminary consensus and are indicated with red text.

Please confirm your vote to finalize the decision on inclusion / exclusion of images as representative of each structure.

**NONMELANOCYTIC: Basal cell carcinoma**

The following structures reached consensus for this diagnosis: Leaf-like structures, Blue-gray ovoid nests, Multiple blue-gray dots and globules (backshot scatter), Spoke wheel-like structures / concentric structures, Ulceration / erosion, White shiny blotches and strands, Arborizing blood vessels, Short fine telangiectasias (superficial BCC)

To ensure agreement on representative teaching images for each structure, we have provided the percentage of panelists who voted "agree" or "strongly agree" for each.

Images with < 70% positive votes did not reach preliminary consensus and are indicated with red text.

Please confirm your vote to finalize the decision on inclusion / exclusion of images as representative of each structure.

Basal cell carcinoma: Leaf-like structures  
Below, please confirm your vote for EACH image if you agree that it is representative of this structure.

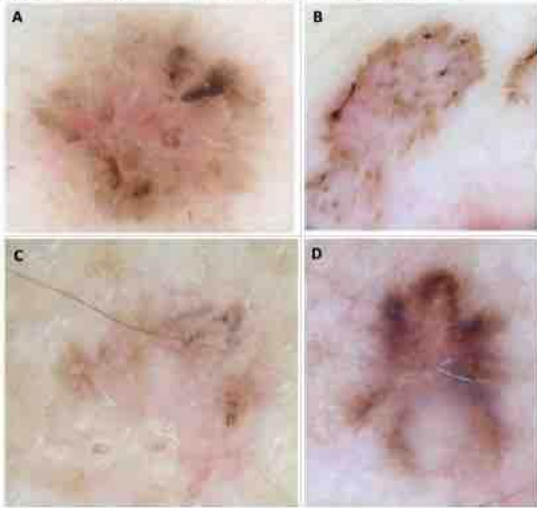

|                 | NO, this image is NOT representative | YES, this image IS representative |
|-----------------|--------------------------------------|-----------------------------------|
| Image A (92.3%) | <input type="radio"/>                | <input type="radio"/>             |
| Image B (95.2%) | <input type="radio"/>                | <input type="radio"/>             |
| Image C (80.8%) | <input type="radio"/>                | <input type="radio"/>             |
| Image D (76.9%) | <input type="radio"/>                | <input type="radio"/>             |

Basal cell carcinoma: Blue-gray ovoid nests  
Below, please confirm your vote for EACH image if you agree that it is representative of this structure.

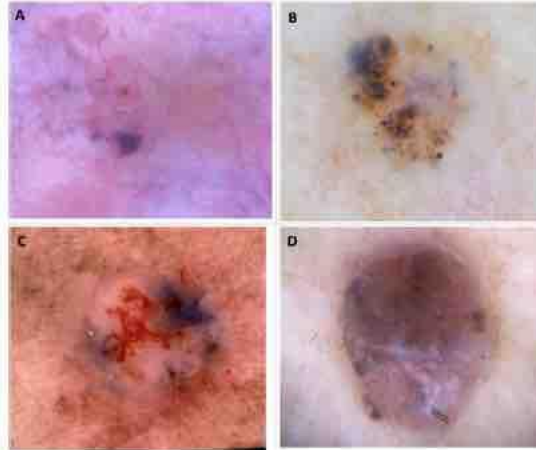

|                 | NO, this image is NOT representative | YES, this image IS representative |
|-----------------|--------------------------------------|-----------------------------------|
| Image A (96.2%) | <input type="radio"/>                | <input type="radio"/>             |
| Image B (96.2%) | <input type="radio"/>                | <input type="radio"/>             |
| Image C (80.8%) | <input type="radio"/>                | <input type="radio"/>             |
| Image D (58%)   | <input type="radio"/>                | <input type="radio"/>             |

Basal cell carcinoma: Multiple blue-gray dots and globules (beckhof scatter)  
Below, please confirm your vote for EACH image if you agree that it is representative of this structure.

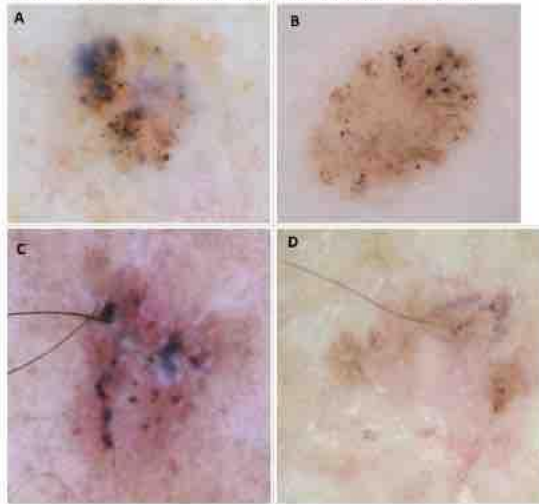

|                 | NO, this image is NOT representative | YES, this image IS representative |
|-----------------|--------------------------------------|-----------------------------------|
| Image A (100%)  | <input type="radio"/>                | <input type="radio"/>             |
| Image B (100%)  | <input type="radio"/>                | <input type="radio"/>             |
| Image C (80.8%) | <input type="radio"/>                | <input type="radio"/>             |
| Image D (76.9%) | <input type="radio"/>                | <input type="radio"/>             |

Basal cell carcinoma: Spoke wheel-like structures / concentric structures  
Below, please confirm your vote for EACH image if you agree that it is representative of this structure.

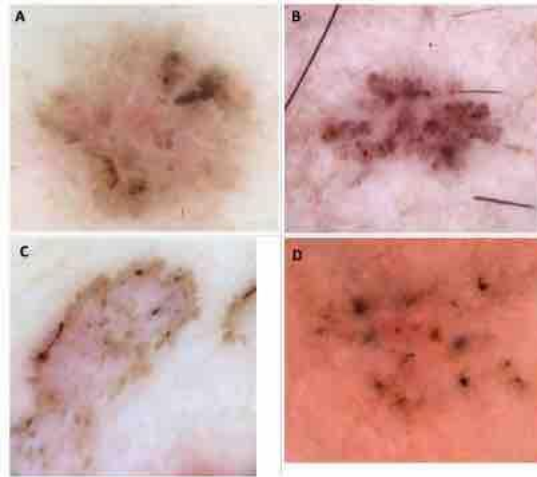

|                 | NO, this image is NOT representative | YES, this image IS representative |
|-----------------|--------------------------------------|-----------------------------------|
| Image A (84.6%) | <input type="radio"/>                | <input type="radio"/>             |
| Image B (94.6%) | <input type="radio"/>                | <input type="radio"/>             |
| Image C (96.2%) | <input type="radio"/>                | <input type="radio"/>             |
| Image D (84.6%) | <input type="radio"/>                | <input type="radio"/>             |

Basal cell carcinoma: Ulceration / erosion  
 Below, please confirm your vote for EACH image if you agree that it is representative of this structure.

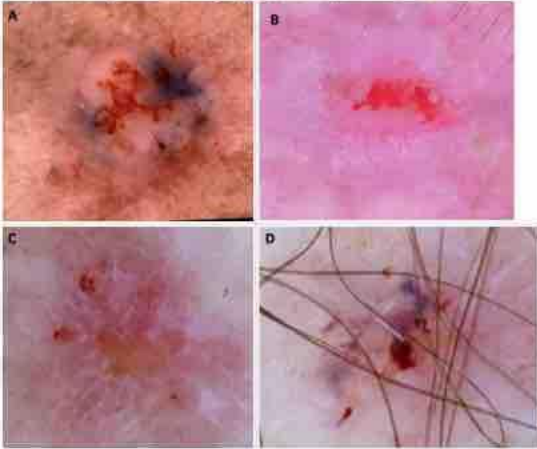

|                 | NO, this image is NOT representative | YES, this image IS representative |
|-----------------|--------------------------------------|-----------------------------------|
| Image A (88.5%) | <input type="radio"/>                | <input type="radio"/>             |
| Image B (96.2%) | <input type="radio"/>                | <input type="radio"/>             |
| Image C (92.3%) | <input type="radio"/>                | <input type="radio"/>             |
| Image D (84.6%) | <input type="radio"/>                | <input type="radio"/>             |

Basal cell carcinoma: White shiny blotches and strands  
 Below, please confirm your vote for EACH image if you agree that it is representative of this structure.

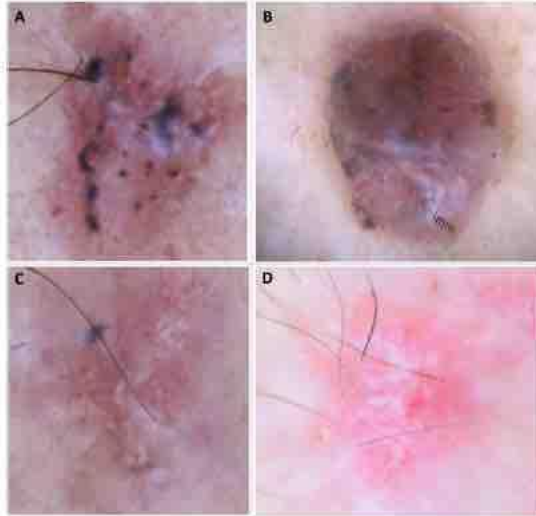

|                 | NO, this image is NOT representative | YES, this image IS representative |
|-----------------|--------------------------------------|-----------------------------------|
| Image A (100%)  | <input type="radio"/>                | <input type="radio"/>             |
| Image B (100%)  | <input type="radio"/>                | <input type="radio"/>             |
| Image C (96.2%) | <input type="radio"/>                | <input type="radio"/>             |
| Image D (100%)  | <input type="radio"/>                | <input type="radio"/>             |

Basal cell carcinoma: Arborizing blood vessels  
 Below, please confirm your vote for EACH image if you agree that it is representative of this structure.

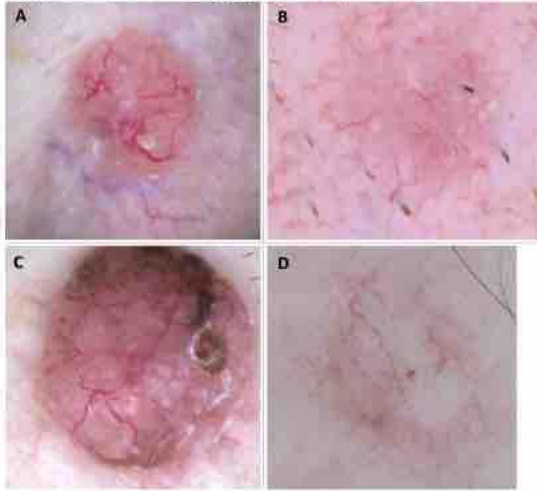

|                 | NO, this image is NOT representative | YES, this image IS representative |
|-----------------|--------------------------------------|-----------------------------------|
| Image A (100%)  | <input type="radio"/>                | <input type="radio"/>             |
| Image B (92.3%) | <input type="radio"/>                | <input type="radio"/>             |
| Image C (100%)  | <input type="radio"/>                | <input type="radio"/>             |
| Image D (100%)  | <input type="radio"/>                | <input type="radio"/>             |

Basal cell carcinoma: Short fine telangiectasias (superficial BCC)  
 Below, please confirm your vote for EACH image if you agree that it is representative of this structure.

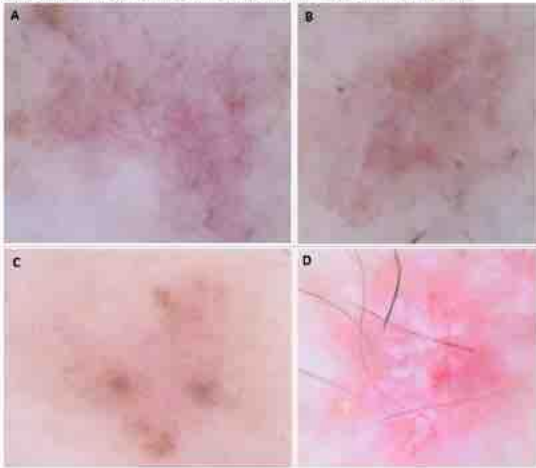

|                 | NO, this image is NOT representative | YES, this image IS representative |
|-----------------|--------------------------------------|-----------------------------------|
| Image A (76.9%) | <input type="radio"/>                | <input type="radio"/>             |
| Image B (92.3%) | <input type="radio"/>                | <input type="radio"/>             |
| Image C (84.6%) | <input type="radio"/>                | <input type="radio"/>             |
| Image D (73.1%) | <input type="radio"/>                | <input type="radio"/>             |

**NONMELANOCYTIC: Actinic keratosis**

The following structures reached consensus for this diagnosis: Rosette sign, Surface scale, Strawberry pattern (pink-red pseudonetwork +/- fine, wavy vessels (straight or coiled) surrounding hair follicles +/- white circles with central yellow clod (targetoid hair follicles))

To ensure agreement on representative teaching images for each structure, we have provided the percentage of panelists who voted "agree" or "strongly agree" for each.

Images with < 70% positive votes did not reach preliminary consensus and are indicated with red text.

Please confirm your vote to finalize the decision on inclusion / exclusion of images as representative of each structure.

**Actinic keratosis: Rosette sign**

Below, please confirm your vote for EACH image if you agree that it is representative of this structure.

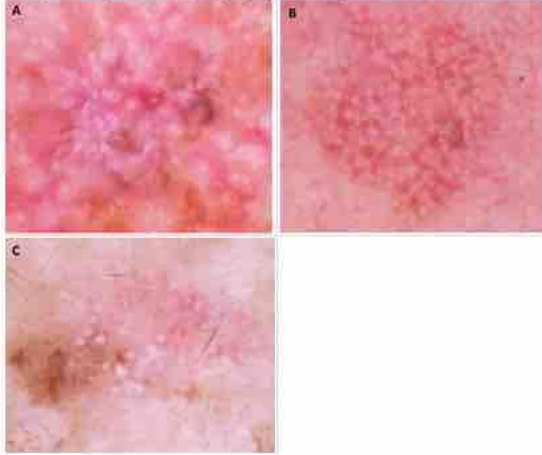

|                 | NO, this image is NOT representative | YES, this image IS representative |
|-----------------|--------------------------------------|-----------------------------------|
| Image A (100%)  | <input type="radio"/>                | <input type="radio"/>             |
| Image B (96.2%) | <input type="radio"/>                | <input type="radio"/>             |
| Image C (100%)  | <input type="radio"/>                | <input type="radio"/>             |

**Actinic keratosis: Surface scale**

Below, please confirm your vote for EACH image if you agree that it is representative of this structure.

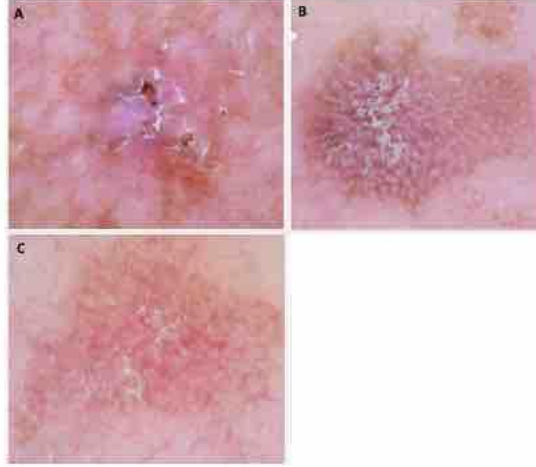

|                 | NO, this image is NOT representative | YES, this image IS representative |
|-----------------|--------------------------------------|-----------------------------------|
| Image A (96.2%) | <input type="radio"/>                | <input type="radio"/>             |
| Image B (100%)  | <input type="radio"/>                | <input type="radio"/>             |
| Image C (100%)  | <input type="radio"/>                | <input type="radio"/>             |

**Actinic keratosis: Strawberry pattern (pink-red pseudonetwork +/- fine, wavy vessels (straight or coiled) surrounding hair follicles +/- white circles with central yellow clod (targetoid hair follicles))**

Below, please confirm your vote for EACH image if you agree that it is representative of this structure.

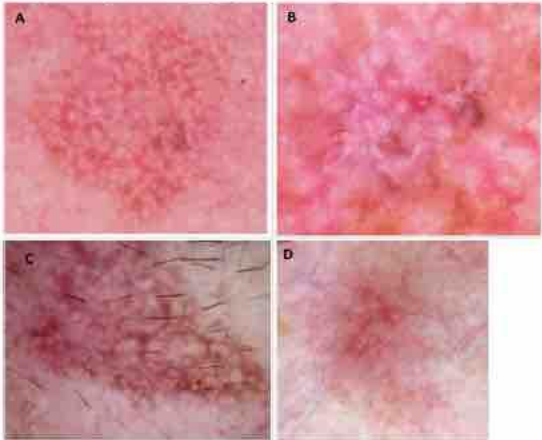

|                 | NO, this image is NOT representative | YES, this image IS representative |
|-----------------|--------------------------------------|-----------------------------------|
| Image A (92.2%) | <input type="radio"/>                | <input type="radio"/>             |
| Image B (69.2%) | <input type="radio"/>                | <input type="radio"/>             |
| Image C (88.5%) | <input type="radio"/>                | <input type="radio"/>             |
| Image D (50%)   | <input type="radio"/>                | <input type="radio"/>             |

**NONMELANOCYTIC: Pigmented actinic keratosis**

The following structures reached consensus for this diagnosis: Gray dots, Annular-granular pattern (gray dots around follicular openings), Rosette sign, Surface scale

To ensure agreement on representative teaching images for each structure, we have provided the percentage of panelists who voted "agree" or "strongly agree" for each.

Images with < 70% positive votes did not reach preliminary consensus and are indicated with red text.

Please confirm your vote to finalize the decision on inclusion / exclusion of images as representative of each structure.

**Pigmented actinic keratosis: Gray dots**

Below, please confirm your vote for EACH image if you agree that it is representative of this structure.

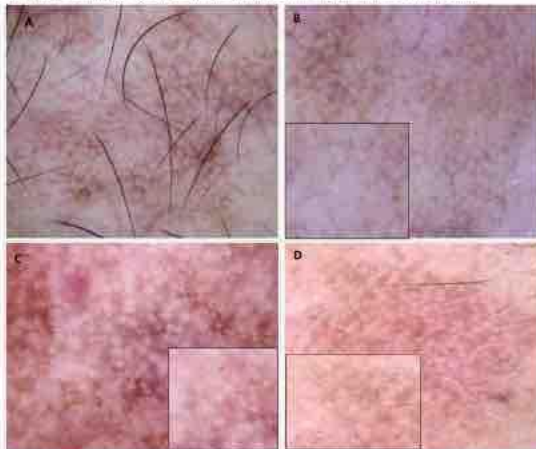

|                 | NO, this image is NOT representative | YES, this image IS representative |
|-----------------|--------------------------------------|-----------------------------------|
| Image A (69.2%) | <input type="radio"/>                | <input type="radio"/>             |
| Image B (76.9%) | <input type="radio"/>                | <input type="radio"/>             |
| Image C (73.1%) | <input type="radio"/>                | <input type="radio"/>             |
| Image D (73.1%) | <input type="radio"/>                | <input type="radio"/>             |

Pigmented actinic keratosis: Annular-granular pattern (gray dots around follicular openings)  
 Below, please confirm your vote for EACH image if you agree that it is representative of this structure.

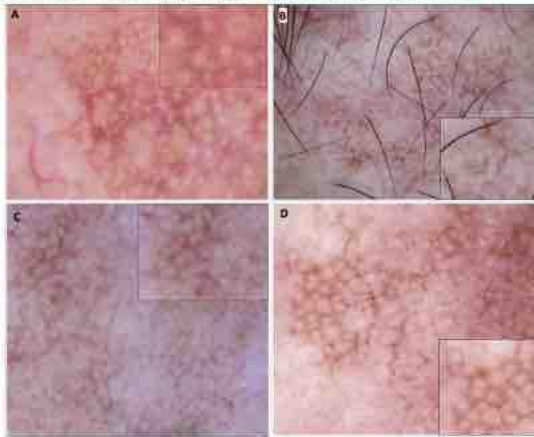

|                 | NO, this image is NOT representative | YES, this image IS representative |
|-----------------|--------------------------------------|-----------------------------------|
| Image A (88.5%) | <input type="radio"/>                | <input type="radio"/>             |
| Image B (94.6%) | <input type="radio"/>                | <input type="radio"/>             |
| Image C (76.9%) | <input type="radio"/>                | <input type="radio"/>             |
| Image D (88.5%) | <input type="radio"/>                | <input type="radio"/>             |

Pigmented actinic keratosis: Rosette sign  
 Below, please confirm your vote for EACH image if you agree that it is representative of this structure.

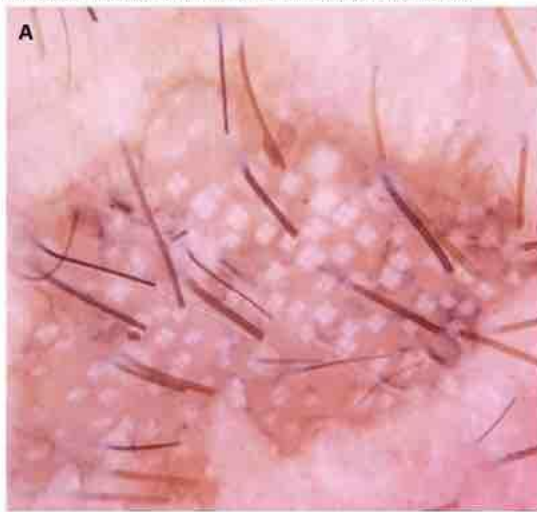

|                | NO, this image is NOT representative | YES, this image IS representative |
|----------------|--------------------------------------|-----------------------------------|
| Image A (100%) | <input type="radio"/>                | <input type="radio"/>             |

Pigmented actinic keratosis: Surface scale  
 Below, please confirm your vote for EACH image if you agree that it is representative of this structure.

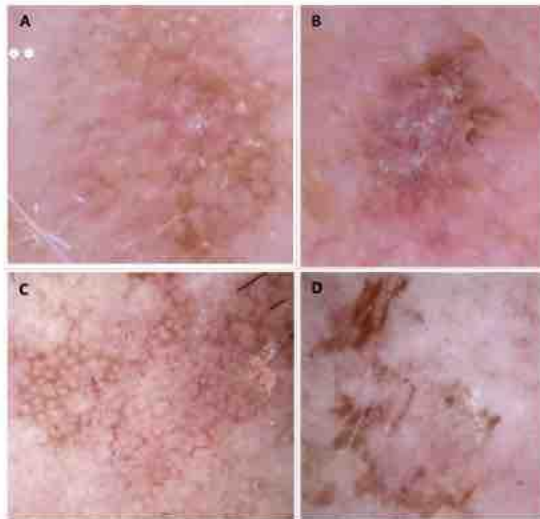

|                 | NO, this image is NOT representative | YES, this image IS representative |
|-----------------|--------------------------------------|-----------------------------------|
| Image A (96.2%) | <input type="radio"/>                | <input type="radio"/>             |
| Image B (100%)  | <input type="radio"/>                | <input type="radio"/>             |
| Image C (80.8%) | <input type="radio"/>                | <input type="radio"/>             |
| Image D (73.1%) | <input type="radio"/>                | <input type="radio"/>             |

**NONMELANOCYTIC: Bowen's disease (squamous cell carcinoma in situ)**

The following structures reached consensus for this diagnosis: Surface scale, Peripheral brown/gray dots arranged linearly (pigmented SCCIS), Glomerular (coiled) / dotted blood vessels

To ensure agreement on representative teaching images for each structure, we have provided the percentage of panelists who voted "agree" or "strongly agree" for each.

Images with < 70% positive votes did not reach preliminary consensus and are indicated with red text.

Please confirm your vote to finalize the decision on inclusion / exclusion of images as representative of each structure.

Bowen's disease (SCCS): Surface scale  
Below, please confirm your vote for EACH image if you agree that it is representative of this structure.

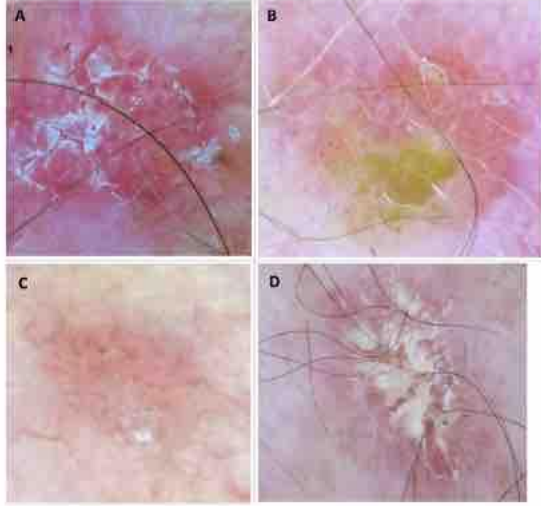

|                 | NO, this image is NOT representative | YES, this image IS representative |
|-----------------|--------------------------------------|-----------------------------------|
| Image A (100%)  | <input type="radio"/>                | <input type="radio"/>             |
| Image B (84.6%) | <input type="radio"/>                | <input type="radio"/>             |
| Image C (84.6%) | <input type="radio"/>                | <input type="radio"/>             |
| Image D (96.2%) | <input type="radio"/>                | <input type="radio"/>             |

Bowen's disease (SCCS): Peripheral brown/gray dots arranged linearly (pigmented SCCS)  
Below, please confirm your vote for EACH image if you agree that it is representative of this structure.

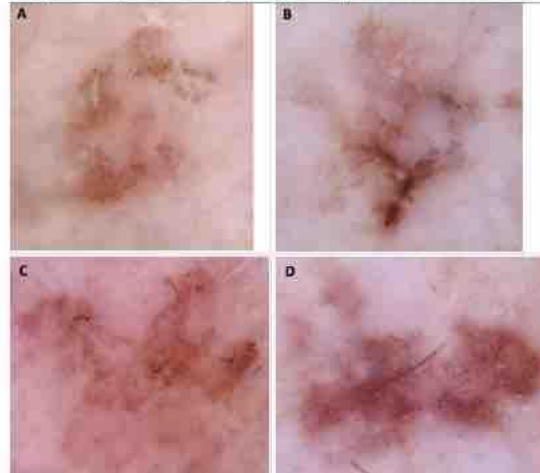

|                 | NO, this image is NOT representative | YES, this image IS representative |
|-----------------|--------------------------------------|-----------------------------------|
| Image A (69.2%) | <input type="radio"/>                | <input type="radio"/>             |
| Image B (65.4%) | <input type="radio"/>                | <input type="radio"/>             |
| Image C (73.1%) | <input type="radio"/>                | <input type="radio"/>             |
| Image D (84.6%) | <input type="radio"/>                | <input type="radio"/>             |

Bowen's disease (SCCS): Glomerular (coiled) / dotted blood vessels  
Below, please confirm your vote for EACH image if you agree that it is representative of this structure.

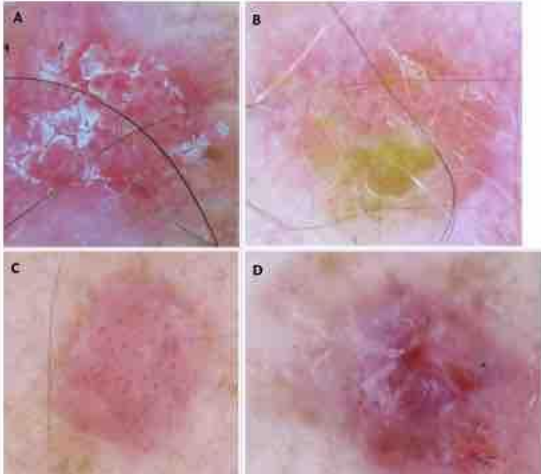

|                 | NO, this image is NOT representative | YES, this image IS representative |
|-----------------|--------------------------------------|-----------------------------------|
| Image A (92.3%) | <input type="radio"/>                | <input type="radio"/>             |
| Image B (88.5%) | <input type="radio"/>                | <input type="radio"/>             |
| Image C (92.3%) | <input type="radio"/>                | <input type="radio"/>             |
| Image D (84.6%) | <input type="radio"/>                | <input type="radio"/>             |

**NONMELANOCYTIC: Keratoacanthoma**

The following structures reached consensus for this diagnosis: Central keratin mass, hairpin (looped) or serpentine (linear-irregular) blood vessels, usually at the periphery, with white-yellow halo.

To ensure agreement on representative teaching images for each structure, we have provided the percentage of panelists who voted "agree" or "strongly agree" for each.

Images with < 70% positive votes did not reach preliminary consensus and are indicated with red text.

Please confirm your vote to finalize the decision on inclusion / exclusion of images as representative of each structure.



**Keratoacanthoma: Central keratin mass**  
 Below, please confirm your vote for EACH image if you agree that it is representative of this structure.

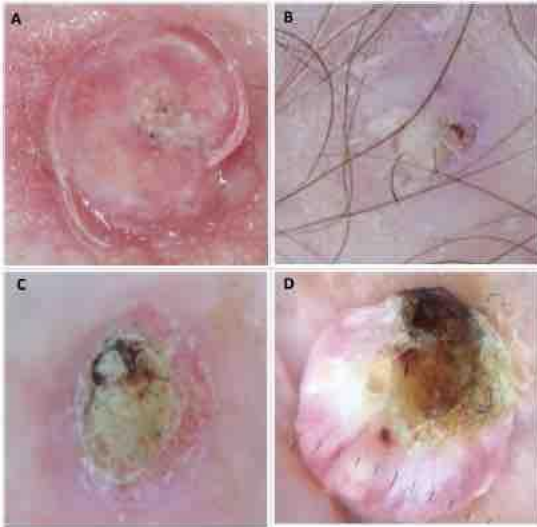

|                 |                                      |                                   |
|-----------------|--------------------------------------|-----------------------------------|
|                 | NO, this image is NOT representative | YES, this image IS representative |
| Image A (80.8%) | <input type="radio"/>                | <input type="radio"/>             |
| Image B (65.4%) | <input type="radio"/>                | <input type="radio"/>             |
| Image C (96.2%) | <input type="radio"/>                | <input type="radio"/>             |
| Image D (100%)  | <input type="radio"/>                | <input type="radio"/>             |

**Keratoacanthoma: Hairpin (looped) or serpentine (linear-irregular) blood vessels, usually at the periphery, with white-yellow halo**  
 Below, please confirm your vote for EACH image if you agree that it is representative of this structure.

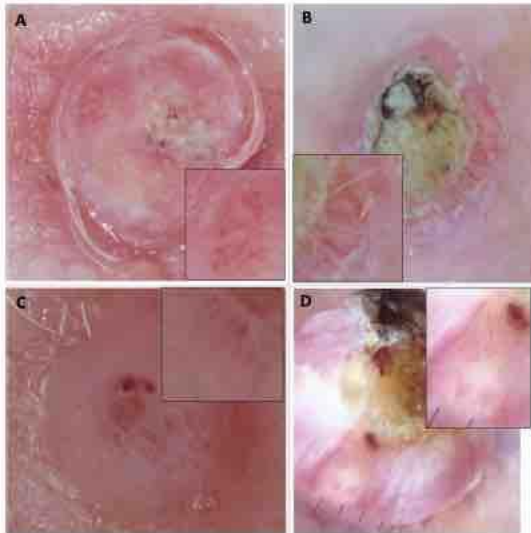

|                 |                                      |                                   |
|-----------------|--------------------------------------|-----------------------------------|
|                 | NO, this image is NOT representative | YES, this image IS representative |
| Image A (50%)   | <input type="radio"/>                | <input type="radio"/>             |
| Image B (100%)  | <input type="radio"/>                | <input type="radio"/>             |
| Image C (92.3%) | <input type="radio"/>                | <input type="radio"/>             |
| Image D (84.6%) | <input type="radio"/>                | <input type="radio"/>             |

**Squamous cell carcinoma: Yellow keratin mass / scale-crust**  
 Below, please confirm your vote for EACH image if you agree that it is representative of this structure.

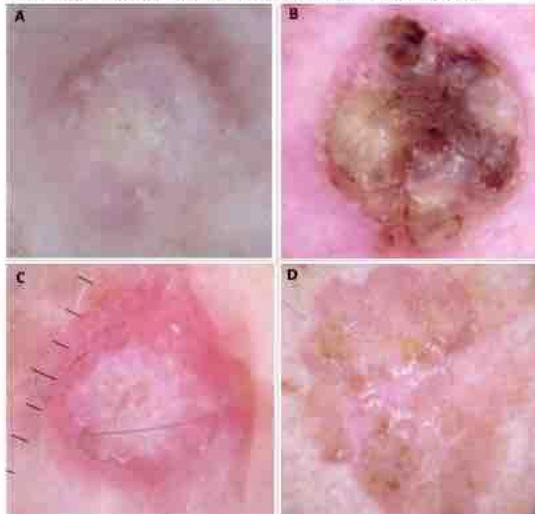

|                 |                                      |                                   |
|-----------------|--------------------------------------|-----------------------------------|
|                 | NO, this image is NOT representative | YES, this image IS representative |
| Image A (92.3%) | <input type="radio"/>                | <input type="radio"/>             |
| Image B (96.2%) | <input type="radio"/>                | <input type="radio"/>             |
| Image C (84.6%) | <input type="radio"/>                | <input type="radio"/>             |
| Image D (80.8%) | <input type="radio"/>                | <input type="radio"/>             |

**NONMELANOCYTIC: Squamous cell carcinoma**  
 The following structures reached consensus for this diagnosis: Yellow keratin mass / scale-crust, Ulceration / blood spots / hemorrhage, White circles ("keratin pearls"), Rosette sign, Glomerular (coiled) blood vessels, Hairpin vessels, usually with whitish halo.

To ensure agreement on representative teaching images for each structure, we have provided the percentage of panelists who voted "agree" or "strongly agree" for each.

Images with < 70% positive votes did not reach preliminary consensus and are indicated with red text.

Please confirm your vote to finalize the decision on inclusion / exclusion of images as representative of each structure.

Squamous cell carcinoma: Ulceration / blood spots / hemorrhage  
Below, please confirm your vote for EACH image if you agree that it is representative of this structure.

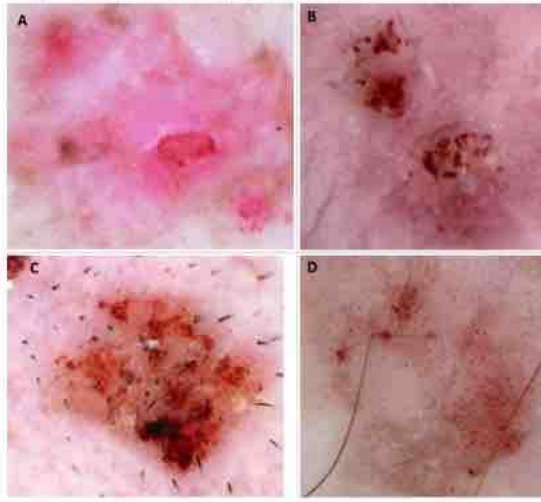

|                 | NO, this image is NOT representative | YES, this image IS representative |
|-----------------|--------------------------------------|-----------------------------------|
| Image A (100%)  | <input type="radio"/>                | <input type="radio"/>             |
| Image B (100%)  | <input type="radio"/>                | <input type="radio"/>             |
| Image C (100%)  | <input type="radio"/>                | <input type="radio"/>             |
| Image D (65.4%) | <input type="radio"/>                | <input type="radio"/>             |

Squamous cell carcinoma: White circles ("keratin pearls")  
Below, please confirm your vote for EACH image if you agree that it is representative of this structure.

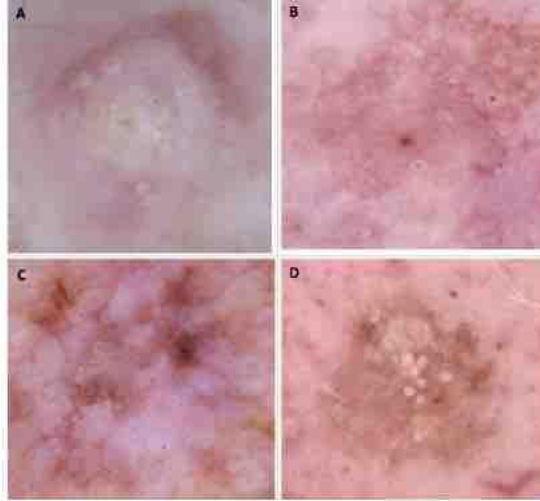

|                 | NO, this image is NOT representative | YES, this image IS representative |
|-----------------|--------------------------------------|-----------------------------------|
| Image A (96.2%) | <input type="radio"/>                | <input type="radio"/>             |
| Image B (88.5%) | <input type="radio"/>                | <input type="radio"/>             |
| Image C (84.6%) | <input type="radio"/>                | <input type="radio"/>             |
| Image D (96.2%) | <input type="radio"/>                | <input type="radio"/>             |

Squamous cell carcinoma: Rosette sign  
Below, please confirm your vote for EACH image if you agree that it is representative of this structure.

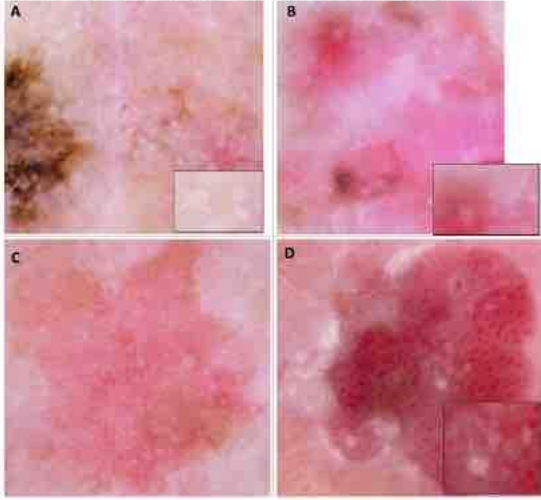

|                 | NO, this image is NOT representative | YES, this image IS representative |
|-----------------|--------------------------------------|-----------------------------------|
| Image A (96.2%) | <input type="radio"/>                | <input type="radio"/>             |
| Image B (90.8%) | <input type="radio"/>                | <input type="radio"/>             |
| Image C (92.3%) | <input type="radio"/>                | <input type="radio"/>             |
| Image D (96.2%) | <input type="radio"/>                | <input type="radio"/>             |

Squamous cell carcinoma: Glomerular (coiled) blood vessels  
Below, please confirm your vote for EACH image if you agree that it is representative of this structure.

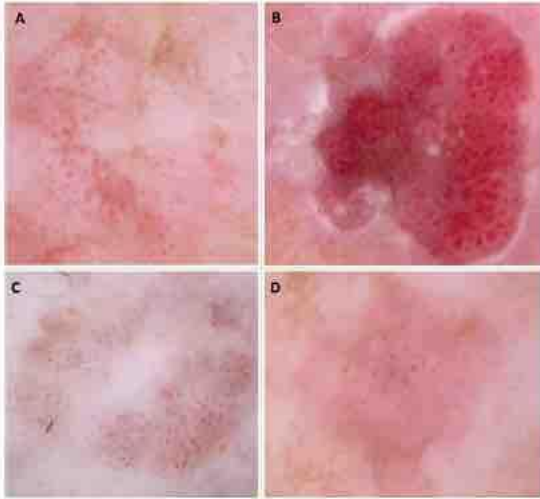

|                 | NO, this image is NOT representative | YES, this image IS representative |
|-----------------|--------------------------------------|-----------------------------------|
| Image A (100%)  | <input type="radio"/>                | <input type="radio"/>             |
| Image B (96.2%) | <input type="radio"/>                | <input type="radio"/>             |
| Image C (100%)  | <input type="radio"/>                | <input type="radio"/>             |
| Image D (76.9%) | <input type="radio"/>                | <input type="radio"/>             |

Squamous cell carcinoma: Hairpin vessels, usually with whitish halo  
 Below, please confirm your vote for EACH image if you agree that it is representative of this structure.

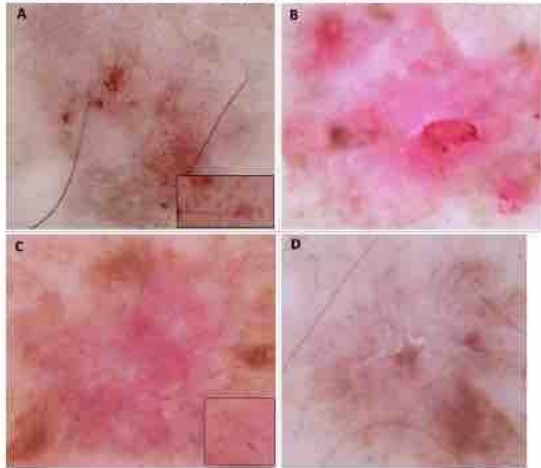

|                 | NO, this image is NOT representative | YES, this image is representative |
|-----------------|--------------------------------------|-----------------------------------|
| Image A (76.9%) | <input type="radio"/>                | <input type="radio"/>             |
| Image B (65.4%) | <input type="radio"/>                | <input type="radio"/>             |
| Image C (68.2%) | <input type="radio"/>                | <input type="radio"/>             |
| Image D (53.8%) | <input type="radio"/>                | <input type="radio"/>             |

Squamous cell carcinoma: Hairpin vessels, usually with whitish halo [ADDITIONAL IMAGES]  
 Less than 50% of the offered images for 'Hairpin vessels, usually with whitish halo' reached preliminary consensus. In order to ensure adequate provision of exemplary teaching images for evaluation, we have included the following additional images.

Please rate how well you believe EACH image is representative of the indicated structure.

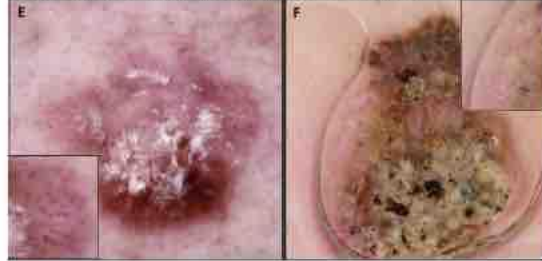

|               | Strongly disagree     | Disagree              | Neutral               | Agree                 | Strongly agree        |
|---------------|-----------------------|-----------------------|-----------------------|-----------------------|-----------------------|
| Image E (NEW) | <input type="radio"/> |
| Image F (NEW) | <input type="radio"/> |

**NONMELANOCYTIC: Solar lentigo**

The following structures reached consensus for this diagnosis: Moth-eaten (sharply demarcated) borders, Homogenous light brown pigmentation, Network-like structures, Fingerprint-like structures (parallel lines)

To ensure agreement on representative teaching images for each structure, we have provided the percentage of panelists who voted "agree" or "strongly agree" for each.

Images with < 70% positive votes did not reach preliminary consensus and are indicated with red text.

Please confirm your vote to finalize the decision on inclusion / exclusion of images as representative of each structure.

Solar lentigo: Moth-eaten (sharply demarcated) borders  
 Below, please confirm your vote for EACH image if you agree that it is representative of this structure.

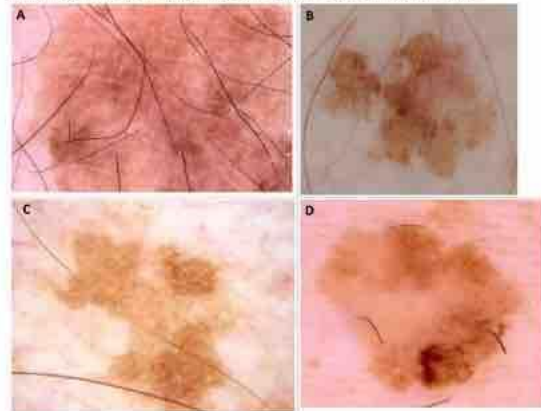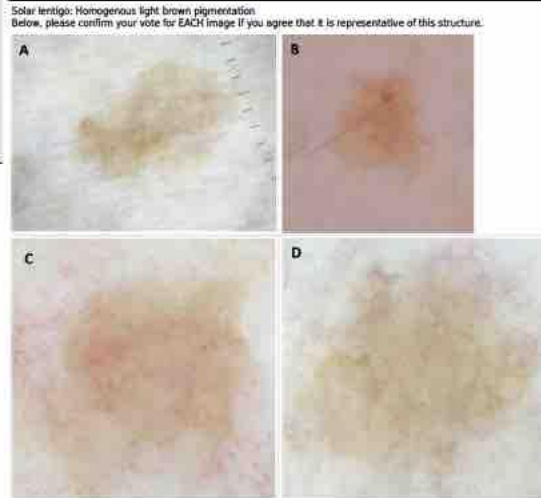

|                 | NO, this image is NOT representative | YES, this image is representative |
|-----------------|--------------------------------------|-----------------------------------|
| Image A (92.3%) | <input type="radio"/>                | <input type="radio"/>             |
| Image B (92.3%) | <input type="radio"/>                | <input type="radio"/>             |
| Image C (88.5%) | <input type="radio"/>                | <input type="radio"/>             |
| Image D (96.3%) | <input type="radio"/>                | <input type="radio"/>             |

Solar lentigo: Network-like structures  
 Below, please confirm your vote for EACH image if you agree that it is representative of this structure.

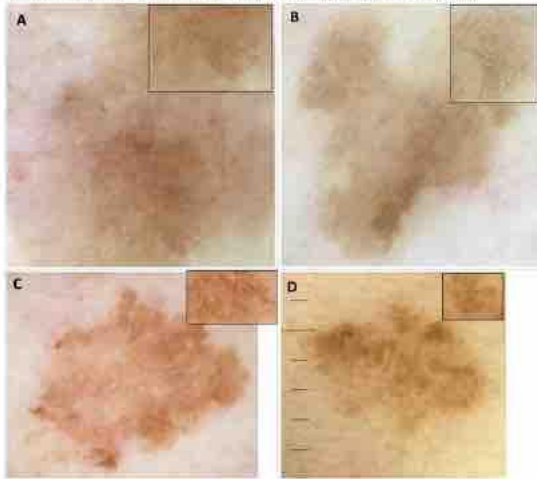

|                 | NO, this image is NOT representative | YES, this image IS representative |
|-----------------|--------------------------------------|-----------------------------------|
| Image A (100%)  | <input type="radio"/>                | <input type="radio"/>             |
| Image B (84.6%) | <input type="radio"/>                | <input type="radio"/>             |
| Image C (96.2%) | <input type="radio"/>                | <input type="radio"/>             |
| Image D (96.2%) | <input type="radio"/>                | <input type="radio"/>             |

Solar lentigo: Fingerprint-like structures (parallel lines)  
 Below, please confirm your vote for EACH image if you agree that it is representative of this structure.

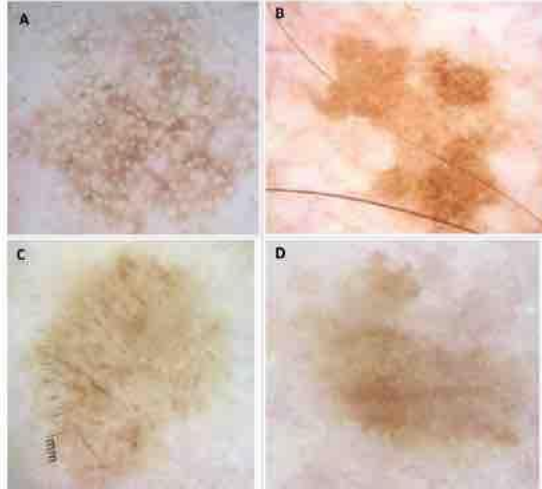

|                 | NO, this image is NOT representative | YES, this image IS representative |
|-----------------|--------------------------------------|-----------------------------------|
| Image A (84.6%) | <input type="radio"/>                | <input type="radio"/>             |
| Image B (65.4%) | <input type="radio"/>                | <input type="radio"/>             |
| Image C (76.9%) | <input type="radio"/>                | <input type="radio"/>             |
| Image D (96.2%) | <input type="radio"/>                | <input type="radio"/>             |

**NONMELANOCYTIC: Simple lentigo (lentigo simplex)**  
 The following structure reached consensus for this diagnosis: Symmetric with uniform pigment network.

To ensure agreement on representative teaching images for this structure, we have provided the percentage of panelists who voted "agree" or "strongly agree".

Images with < 70% positive votes did not reach preliminary consensus and are indicated with red text.

Please confirm your vote to finalize the decision on inclusion / exclusion of images as representative of this structure.

Simple lentigo (lentigo simplex): Symmetric with uniform pigment network.  
 Below, please confirm your vote for EACH image if you agree that it is representative of this structure.

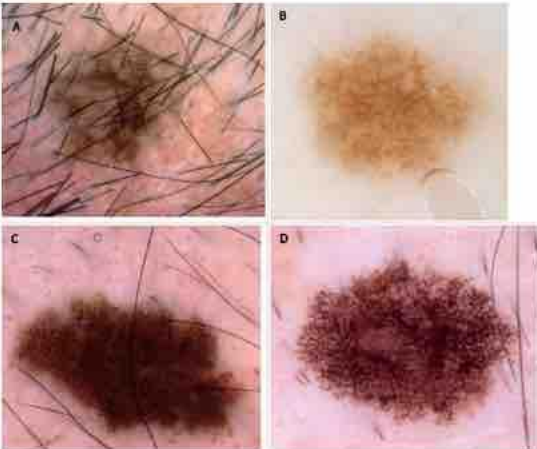

|                 | NO, this image is NOT representative | YES, this image IS representative |
|-----------------|--------------------------------------|-----------------------------------|
| Image A (76.9%) | <input type="radio"/>                | <input type="radio"/>             |
| Image B (86.8%) | <input type="radio"/>                | <input type="radio"/>             |
| Image C (76.9%) | <input type="radio"/>                | <input type="radio"/>             |
| Image D (96.2%) | <input type="radio"/>                | <input type="radio"/>             |

Seborrheic keratosis: Milia-like cysts  
 Below, please confirm your vote for EACH image if you agree that it is representative of this structure.

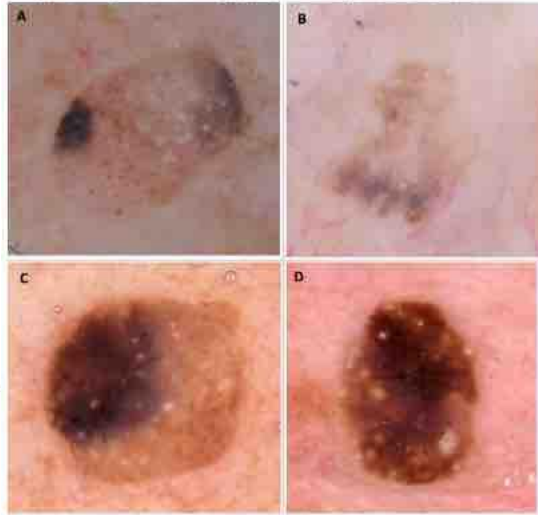

**NONMELANOCYTIC: Seborrheic keratosis**

The following structures reached consensus for this diagnosis: Milia-like cysts, Comedo-Like openings, Moth-eaten (sharply demarcated) borders, "Fissures and ridges" / gyri and sulci / cerebriform pattern, Fat-fingers, Fingerprint-like structures, Hairpin (looped) vessels, usually with whitish halo.

To ensure agreement on representative teaching images for each structure, we have provided the percentage of panelists who voted "agree" or "strongly agree" for each.

Images with < 70% positive votes did not reach preliminary consensus and are indicated with red text.

Please confirm your vote to finalize the decision on inclusion / exclusion of images as representative of each structure.

|                 | NO, this image is NOT representative | YES, this image is representative |
|-----------------|--------------------------------------|-----------------------------------|
| Image A (100%)  | <input type="radio"/>                | <input type="radio"/>             |
| Image B (96.2%) | <input type="radio"/>                | <input type="radio"/>             |
| Image C (100%)  | <input type="radio"/>                | <input type="radio"/>             |
| Image D (100%)  | <input type="radio"/>                | <input type="radio"/>             |

Seborrheic keratosis: Moth-eaten (sharply demarcated) borders  
 Below, please confirm your vote for EACH image if you agree that it is representative of this structure.

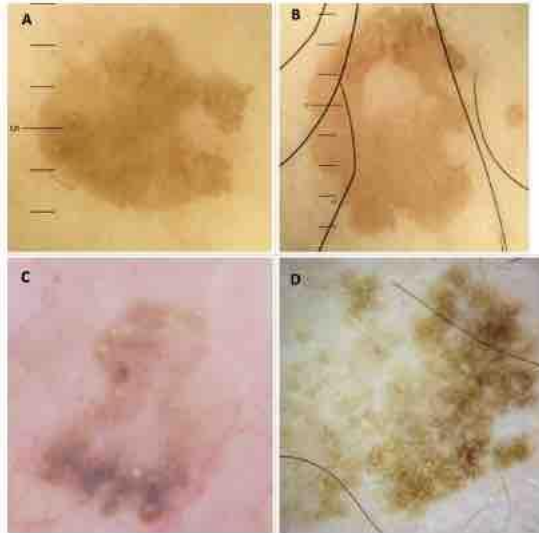

Seborrheic keratosis: Comedo-like openings  
 Below, please confirm your vote for EACH image if you agree that it is representative of this structure.

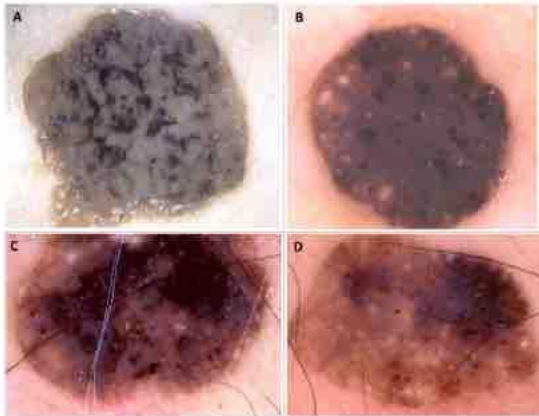

|                 | NO, this image is NOT representative | YES, this image is representative |
|-----------------|--------------------------------------|-----------------------------------|
| Image A (96.2%) | <input type="radio"/>                | <input type="radio"/>             |
| Image B (100%)  | <input type="radio"/>                | <input type="radio"/>             |
| Image C (96.2%) | <input type="radio"/>                | <input type="radio"/>             |
| Image D (100%)  | <input type="radio"/>                | <input type="radio"/>             |

|                 | NO, this image is NOT representative | YES, this image is representative |
|-----------------|--------------------------------------|-----------------------------------|
| Image A (96.2%) | <input type="radio"/>                | <input type="radio"/>             |
| Image B (96.2%) | <input type="radio"/>                | <input type="radio"/>             |
| Image C (69.2%) | <input type="radio"/>                | <input type="radio"/>             |
| Image D (76.9%) | <input type="radio"/>                | <input type="radio"/>             |

Seborrheic keratosis: "Fissures and ridges" / gyri and sulci / cerebriform pattern  
 Below, please confirm your vote for EACH image if you agree that it is representative of this structure.

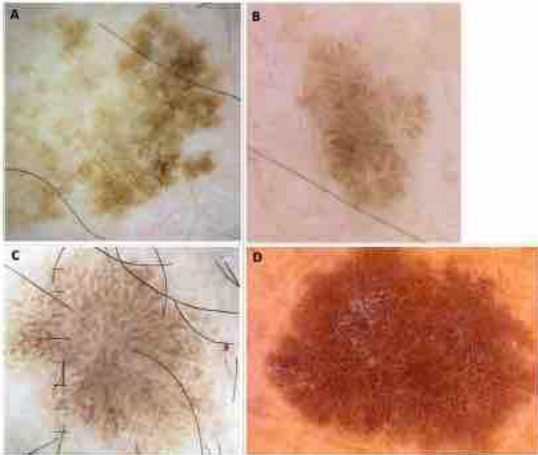

|                 |                                      |                                   |
|-----------------|--------------------------------------|-----------------------------------|
|                 | NO, this image is NOT representative | YES, this image IS representative |
| Image A (73.1%) | <input type="radio"/>                | <input type="radio"/>             |
| Image B (96.2%) | <input type="radio"/>                | <input type="radio"/>             |
| Image C (100%)  | <input type="radio"/>                | <input type="radio"/>             |
| Image D (76.9%) | <input type="radio"/>                | <input type="radio"/>             |

Seborrheic keratosis: Fat-fingers  
 Below, please confirm your vote for EACH image if you agree that it is representative of this structure.

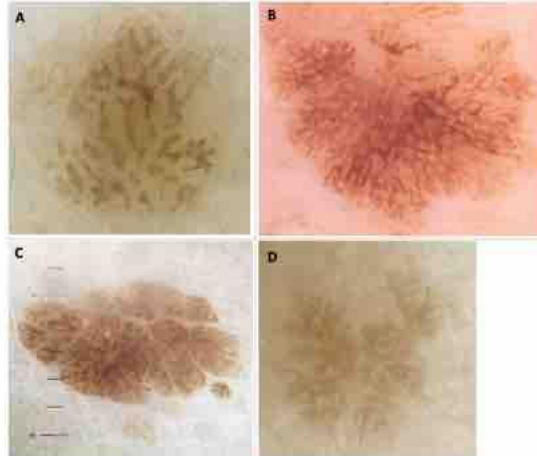

|                 |                                      |                                   |
|-----------------|--------------------------------------|-----------------------------------|
|                 | NO, this image is NOT representative | YES, this image IS representative |
| Image A (100%)  | <input type="radio"/>                | <input type="radio"/>             |
| Image B (100%)  | <input type="radio"/>                | <input type="radio"/>             |
| Image C (88.5%) | <input type="radio"/>                | <input type="radio"/>             |
| Image D (100%)  | <input type="radio"/>                | <input type="radio"/>             |

Seborrheic keratosis: Fingerprint-like structures  
 Below, please confirm your vote for EACH image if you agree that it is representative of this structure.

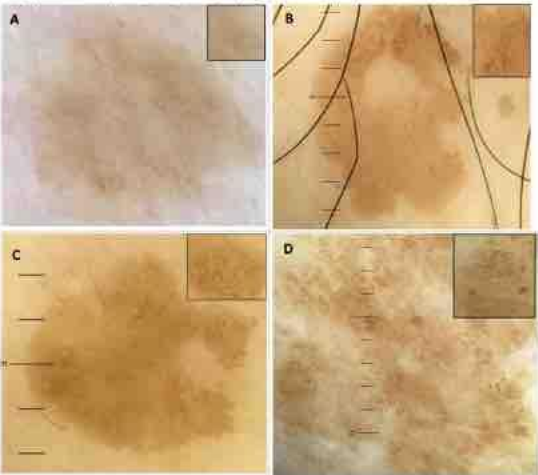

|                 |                                      |                                   |
|-----------------|--------------------------------------|-----------------------------------|
|                 | NO, this image is NOT representative | YES, this image IS representative |
| Image A (88.5%) | <input type="radio"/>                | <input type="radio"/>             |
| Image B (76.9%) | <input type="radio"/>                | <input type="radio"/>             |
| Image C (84.8%) | <input type="radio"/>                | <input type="radio"/>             |
| Image D (96.2%) | <input type="radio"/>                | <input type="radio"/>             |

Seborrheic keratosis: Hairpin (looped) vessels, usually with whitish halo  
 Below, please confirm your vote for EACH image if you agree that it is representative of this structure.

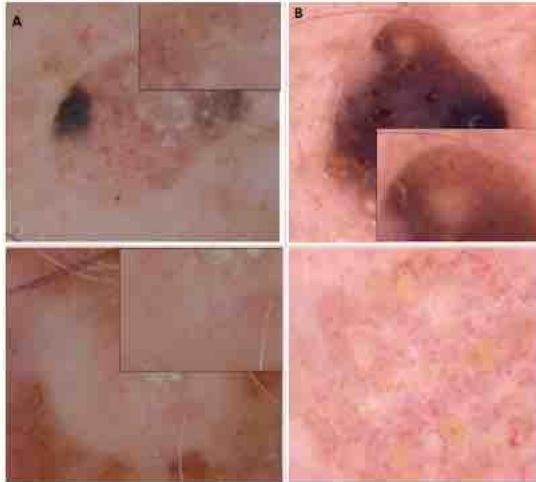

|                 |                                      |                                   |
|-----------------|--------------------------------------|-----------------------------------|
|                 | NO, this image is NOT representative | YES, this image IS representative |
| Image A (100%)  | <input type="radio"/>                | <input type="radio"/>             |
| Image B (88.5%) | <input type="radio"/>                | <input type="radio"/>             |
| Image C (69.2%) | <input type="radio"/>                | <input type="radio"/>             |
| Image D (100%)  | <input type="radio"/>                | <input type="radio"/>             |

**NONMELANOCYTIC: Lichen planus-like keratosis / benign lichenoid keratosis**  
 The following structures reached consensus for this diagnosis: Coarse gray granularity, Peppering (evenly spaced gray dots), Sharp, cut off borders (scalloped / moth eaten).

To ensure agreement on representative teaching images for each structure, we have provided the percentage of panelists who voted "agree" or "strongly agree" for each.

Images with < 70% positive votes did not reach preliminary consensus and are indicated with red text.

Please confirm your vote to finalize the decision on inclusion / exclusion of images as representative of each structure.

Lichen planus-like keratosis / benign lichenoid keratosis: Coarse gray granularity  
 Below, please confirm your vote for EACH image if you agree that it is representative of this structure.

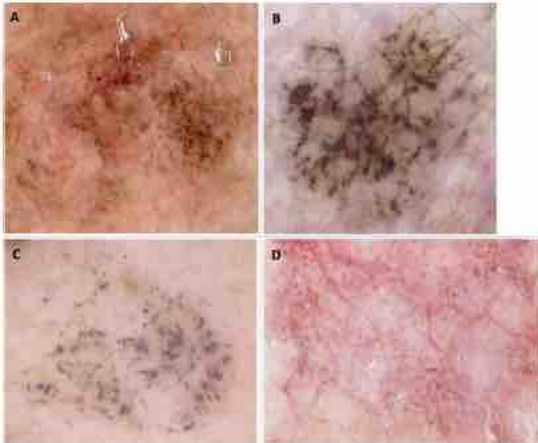

|                 | NO, this image is NOT representative | YES, this image is representative |
|-----------------|--------------------------------------|-----------------------------------|
| Image A (100%)  | <input type="radio"/>                | <input type="radio"/>             |
| Image B (96.2%) | <input type="radio"/>                | <input type="radio"/>             |
| Image C (96.2%) | <input type="radio"/>                | <input type="radio"/>             |
| Image D (88.5%) | <input type="radio"/>                | <input type="radio"/>             |

Lichen planus-like keratosis / benign lichenoid keratosis: Peppering (evenly spaced gray dots)  
 Below, please confirm your vote for EACH image if you agree that it is representative of this structure.

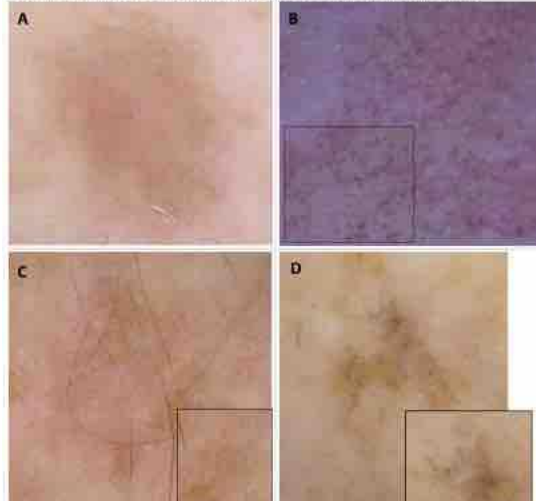

|                 | NO, this image is NOT representative | YES, this image IS representative |
|-----------------|--------------------------------------|-----------------------------------|
| Image A (76.9%) | <input type="radio"/>                | <input type="radio"/>             |
| Image B (100%)  | <input type="radio"/>                | <input type="radio"/>             |
| Image C (69.2%) | <input type="radio"/>                | <input type="radio"/>             |
| Image D (88.5%) | <input type="radio"/>                | <input type="radio"/>             |

Lichen planus-like keratosis / benign lichenoid keratosis: Sharp, cut off borders (scalloped / moth-eaten)  
 Below, please confirm your vote for EACH image if you agree that it is representative of this structure.

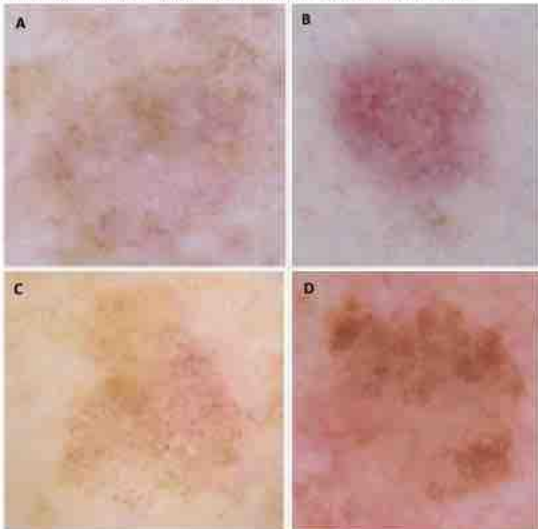

|                 | NO, this image is NOT representative | YES, this image IS representative |
|-----------------|--------------------------------------|-----------------------------------|
| Image A (33.8%) | <input type="radio"/>                | <input type="radio"/>             |
| Image B (26.9%) | <input type="radio"/>                | <input type="radio"/>             |
| Image C (73.1%) | <input type="radio"/>                | <input type="radio"/>             |
| Image D (76.9%) | <input type="radio"/>                | <input type="radio"/>             |

Hemangioma / angioma: Red, blue-red, or maroon lacunae / lagoons with white septae  
 Below, please confirm your vote for EACH image if you agree that it is representative of this structure.

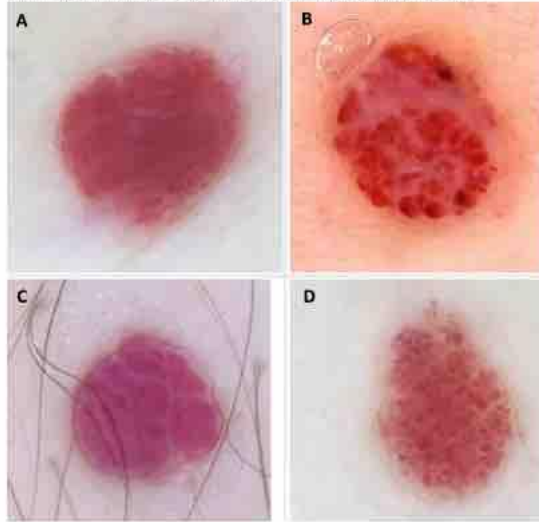

**NONMELANOCYTIC: Hemangioma / angioma**

The following structures reached consensus for this diagnosis: Red, blue-red, or maroon lacunae / lagoons with white septae, Blue-black coloring (when thrombosed).

To ensure agreement on representative teaching images for each structure, we have provided the percentage of panelists who voted "agree" or "strongly agree" for each.

Images with < 70% positive votes did not reach preliminary consensus and are indicated with red text.

Please confirm your vote to finalize the decision on inclusion / exclusion of images as representative of each structure.

|                 | NO, this image is NOT representative | YES, this image IS representative |
|-----------------|--------------------------------------|-----------------------------------|
| Image A (92.3%) | <input type="radio"/>                | <input type="radio"/>             |
| Image B (100%)  | <input type="radio"/>                | <input type="radio"/>             |
| Image C (100%)  | <input type="radio"/>                | <input type="radio"/>             |
| Image D (96.2%) | <input type="radio"/>                | <input type="radio"/>             |

Hemangioma / angioma: Blue-black coloring (when thrombosed)  
 Below, please confirm your vote for EACH image if you agree that it is representative of this structure.

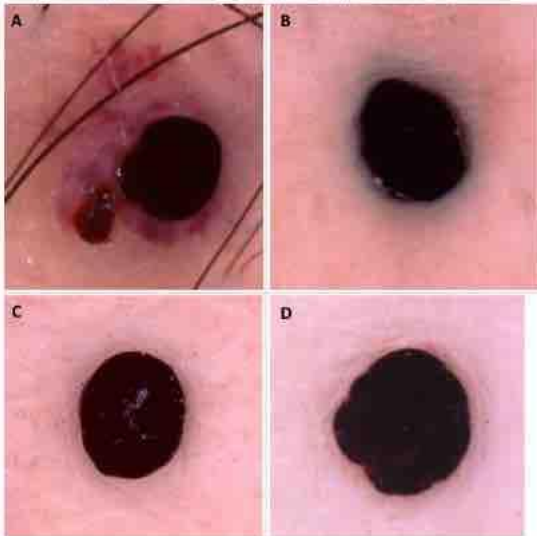

**NONMELANOCYTIC: Angiokeratoma**

The following structures reached consensus for this diagnosis: Red / purple / black ("dark") lacunae, Hemorrhagic crust.

To ensure agreement on representative teaching images for each structure, we have provided the percentage of panelists who voted "agree" or "strongly agree" for each.

Images with < 70% positive votes did not reach preliminary consensus and are indicated with red text.

Please confirm your vote to finalize the decision on inclusion / exclusion of images as representative of each structure.

|                 | NO, this image is NOT representative | YES, this image IS representative |
|-----------------|--------------------------------------|-----------------------------------|
| Image A (96.2%) | <input type="radio"/>                | <input type="radio"/>             |
| Image B (96.2%) | <input type="radio"/>                | <input type="radio"/>             |
| Image C (96.2%) | <input type="radio"/>                | <input type="radio"/>             |
| Image D (92.3%) | <input type="radio"/>                | <input type="radio"/>             |



**Angiokeratoma: Red / purple / black ("dark") lacunae.**  
 Below, please confirm your vote for EACH image if you agree that it is representative of this structure.

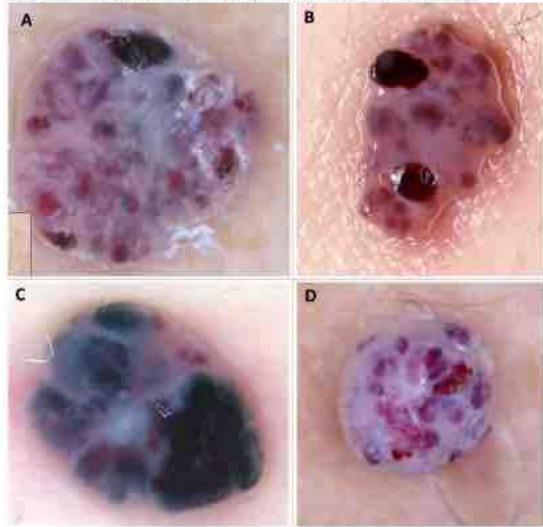

|                 | NO, this image is NOT representative | YES, this image is representative |
|-----------------|--------------------------------------|-----------------------------------|
| Image A (100%)  | <input type="radio"/>                | <input type="radio"/>             |
| Image B (100%)  | <input type="radio"/>                | <input type="radio"/>             |
| Image C (96.2%) | <input type="radio"/>                | <input type="radio"/>             |
| Image D (88.5%) | <input type="radio"/>                | <input type="radio"/>             |

**Angiokeratoma: Hemorrhagic crust.**  
 Below, please confirm your vote for EACH image if you agree that it is representative of this structure.

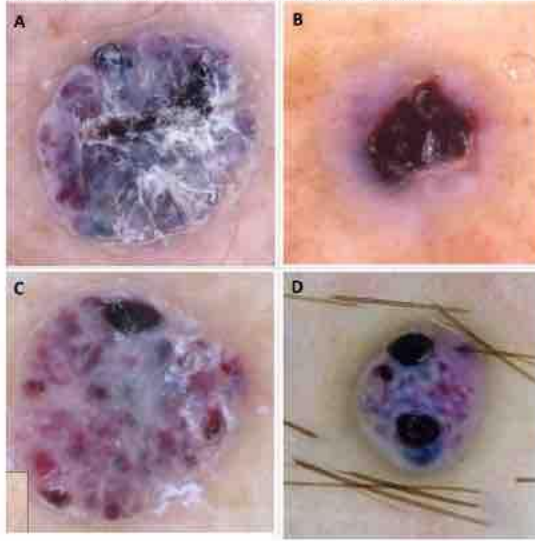

|                 | NO, this image is NOT representative | YES, this image is representative |
|-----------------|--------------------------------------|-----------------------------------|
| Image A (96.2%) | <input type="radio"/>                | <input type="radio"/>             |
| Image B (61.5%) | <input type="radio"/>                | <input type="radio"/>             |
| Image C (92.3%) | <input type="radio"/>                | <input type="radio"/>             |
| Image D (88.5%) | <input type="radio"/>                | <input type="radio"/>             |

**NONMELANOCYTIC: Dermatofibroma**

The following structures reached consensus for this diagnosis: Central scar-like white patch with delicate surrounding network-like structures, Ring-like globules, Central shiny white lines (crystalline structures).

To ensure agreement on representative teaching images for each structure, we have provided the percentage of panelists who voted "agree" or "strongly agree" for each.

Images with < 70% positive votes did not reach preliminary consensus and are indicated with red text.

Please confirm your vote to finalize the decision on inclusion / exclusion of images as representative of each structure.

Dermatofibroma: Central scar-like white patch with delicate surrounding network-like structures  
 Below, please confirm your vote for EACH image if you agree that it is representative of this structure.

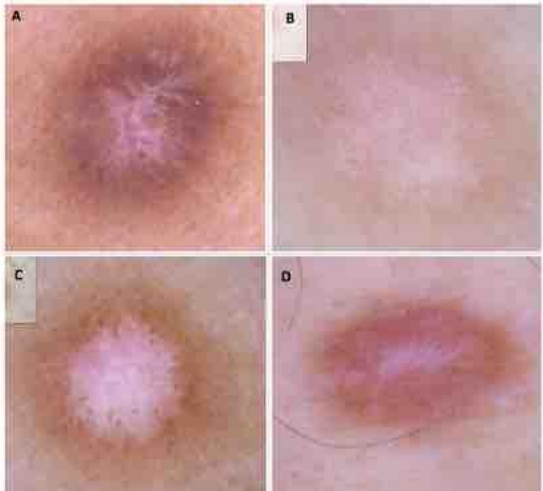

|                 | NO, this image is NOT representative | YES, this image is representative |
|-----------------|--------------------------------------|-----------------------------------|
| Image A (96.2%) | <input type="radio"/>                | <input type="radio"/>             |
| Image B (65.4%) | <input type="radio"/>                | <input type="radio"/>             |
| Image C (100%)  | <input type="radio"/>                | <input type="radio"/>             |
| Image D (100%)  | <input type="radio"/>                | <input type="radio"/>             |

**Dermatofibroma: Ring-like globules**

Below, please confirm your vote for EACH image if you agree that it is representative of this structure.

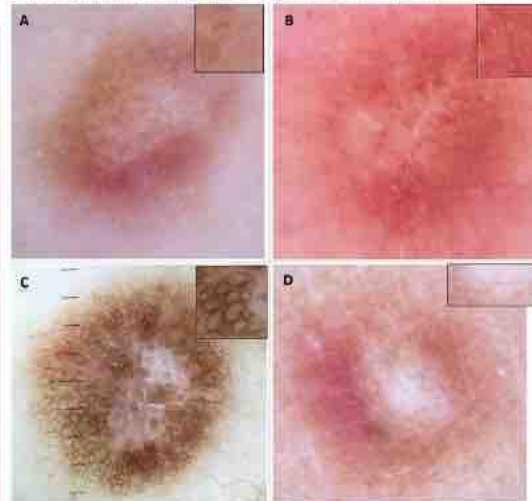

|                 | NO, this image is NOT representative | YES, this image IS representative |
|-----------------|--------------------------------------|-----------------------------------|
| Image A (100%)  | <input type="radio"/>                | <input type="radio"/>             |
| Image B (100%)  | <input type="radio"/>                | <input type="radio"/>             |
| Image C (96.2%) | <input type="radio"/>                | <input type="radio"/>             |
| Image D (80.8%) | <input type="radio"/>                | <input type="radio"/>             |

**Dermatofibroma - Central shiny white lines (crystalline structures)**  
 Below, please confirm your vote for EACH image if you agree that it is representative of this structure.

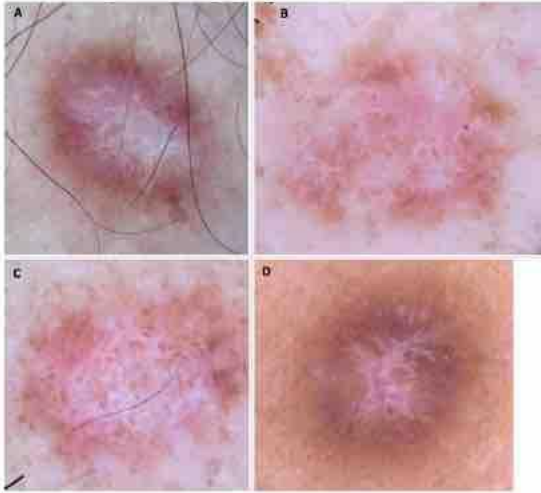

|                 | NO, this image is NOT representative | YES, this image IS representative |
|-----------------|--------------------------------------|-----------------------------------|
| Image A (100%)  | <input type="radio"/>                | <input type="radio"/>             |
| Image B (95.2%) | <input type="radio"/>                | <input type="radio"/>             |
| Image C (100%)  | <input type="radio"/>                | <input type="radio"/>             |

Image D (96.2%)

**NONMELANOCYTIC: Clear cell acanthoma**  
 The following structure reached consensus for this diagnosis: String of pearls (serpiginous) blood vessel pattern

To ensure agreement on representative teaching images for this structure, we have provided the percentage of panelists who voted "agree" or "strongly agree".

Images with < 70% positive votes did not reach preliminary consensus and are indicated with red text.

Please confirm your vote to finalize the decision on inclusion / exclusion of images as representative of this structure.

Clear cell acanthoma: String of pearls (serpiginous) blood vessel pattern  
 Below, please confirm your vote for EACH image if you agree that it is representative of this structure.

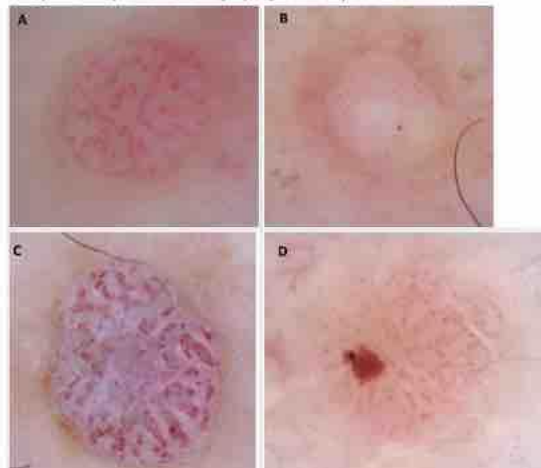

|                 | NO, this image is NOT representative | YES, this image IS representative |
|-----------------|--------------------------------------|-----------------------------------|
| Image A (100%)  | <input type="radio"/>                | <input type="radio"/>             |
| Image B (26.8%) | <input type="radio"/>                | <input type="radio"/>             |
| Image C (96.2%) | <input type="radio"/>                | <input type="radio"/>             |
| Image D (380%)  | <input type="radio"/>                | <input type="radio"/>             |

**NONMELANOCYTIC: Sebaceous hyperplasia**  
 The following structures reached consensus for this diagnosis: Pale yellow lobules around a central follicular opening, Crown vessels.

To ensure agreement on representative teaching images for each structure, we have provided the percentage of panelists who voted "agree" or "strongly agree" for each.

Images with < 70% positive votes did not reach preliminary consensus and are indicated with red text.

Please confirm your vote to finalize the decision on inclusion / exclusion of images as representative of each structure.

Sebaceous hyperplasia: Pale yellow lobules around a central follicular opening  
 Below, please confirm your vote for EACH image if you agree that it is representative of this structure.

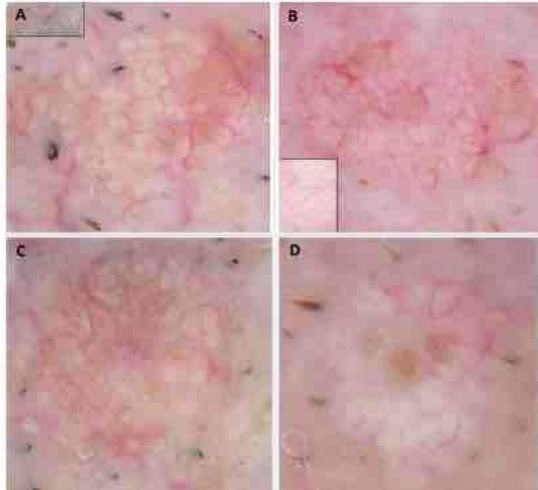

|                 | NO, this image is NOT representative | YES, this image IS representative |
|-----------------|--------------------------------------|-----------------------------------|
| Image A (92.3%) | <input type="radio"/>                | <input type="radio"/>             |
| Image B (100%)  | <input type="radio"/>                | <input type="radio"/>             |
| Image C (88.5%) | <input type="radio"/>                | <input type="radio"/>             |
| Image D (96.2%) | <input type="radio"/>                | <input type="radio"/>             |

Sebaceous hyperplasia: Crown vessels  
 Below, please confirm your vote for EACH image if you agree that it is representative of this structure.

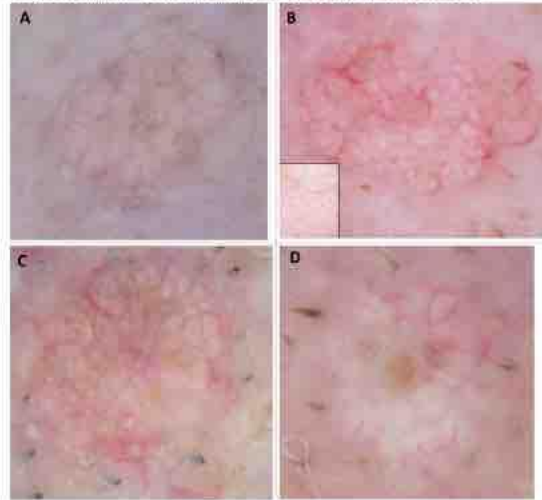

**BENIGN MELANOCYTIC: Overview of benign nevi patterns**

The following structures reached consensus for this diagnosis: Diffuse reticular network, Patchy reticular network, Peripheral reticular network with central hypopigmentation, Peripheral reticular network with central hyperpigmentation, Peripheral reticular network with central globules, Homogenous (tan, brown, blue, or pink), Globular pattern, Two-component pattern, Symmetric multi-component pattern.

To ensure agreement on representative teaching images for each structure, we have provided the percentage of panelists who voted "agree" or "strongly agree" for each.

Images with < 70% positive votes did not reach preliminary consensus and are indicated with red text.

Please confirm your vote to finalize the decision on inclusion / exclusion of images as representative of each structure.

|                 | NO, this image is NOT representative | YES, this image IS representative |
|-----------------|--------------------------------------|-----------------------------------|
| Image A (54%)   | <input type="radio"/>                | <input type="radio"/>             |
| Image B (92.3%) | <input type="radio"/>                | <input type="radio"/>             |
| Image C (88.5%) | <input type="radio"/>                | <input type="radio"/>             |
| Image D (96.2%) | <input type="radio"/>                | <input type="radio"/>             |

Overview of benign nevi patterns: Diffuse reticular network  
 Below, please confirm your vote for EACH image if you agree that it is representative of this structure.

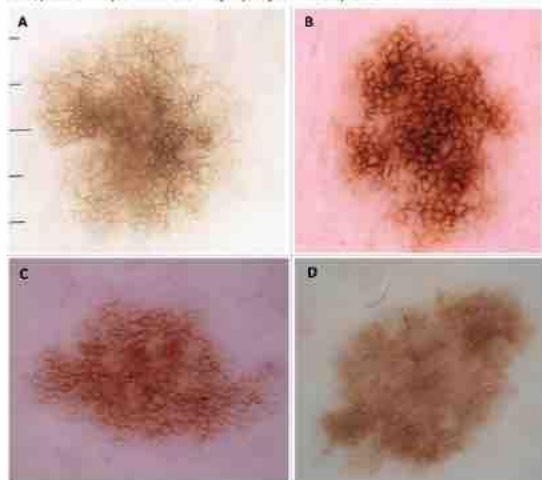

|                 |                                      |                                   |
|-----------------|--------------------------------------|-----------------------------------|
| Image A (100%)  | NO, this image is NOT representative | YES, this image is representative |
|                 | <input type="radio"/>                | <input type="radio"/>             |
| Image B (100%)  | <input type="radio"/>                | <input type="radio"/>             |
| Image C (96.2%) | <input type="radio"/>                | <input type="radio"/>             |
| Image D (96.2%) | <input type="radio"/>                | <input type="radio"/>             |

Overview of benign nevi patterns: Patchy reticular network  
 Below, please confirm your vote for EACH image if you agree that it is representative of this structure.

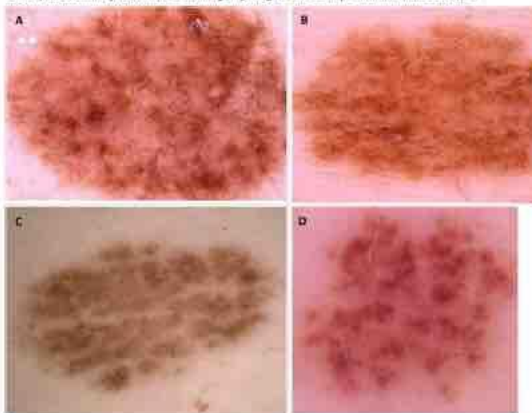

|                 |                                      |                                   |
|-----------------|--------------------------------------|-----------------------------------|
| Image A (96.2%) | NO, this image is NOT representative | YES, this image is representative |
|                 | <input type="radio"/>                | <input type="radio"/>             |
| Image B (92.3%) | <input type="radio"/>                | <input type="radio"/>             |
| Image C (100%)  | <input type="radio"/>                | <input type="radio"/>             |
| Image D (96.2%) | <input type="radio"/>                | <input type="radio"/>             |

Overview of benign nevi patterns: Peripheral reticular network with central hypopigmentation  
 Below, please confirm your vote for EACH image if you agree that it is representative of this structure.

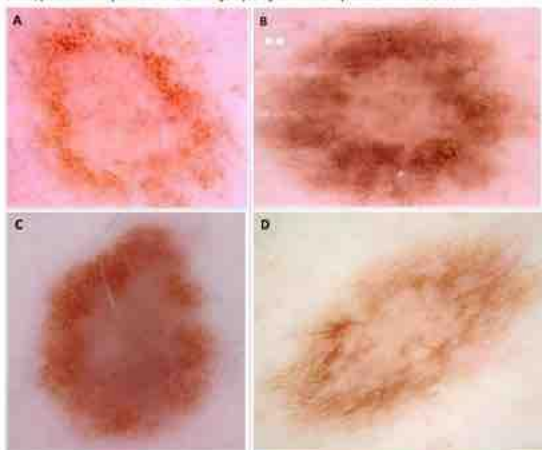

|                 |                                      |                                   |
|-----------------|--------------------------------------|-----------------------------------|
| Image A (100%)  | NO, this image is NOT representative | YES, this image is representative |
|                 | <input type="radio"/>                | <input type="radio"/>             |
| Image B (100%)  | <input type="radio"/>                | <input type="radio"/>             |
| Image C (96.2%) | <input type="radio"/>                | <input type="radio"/>             |
| Image D (100%)  | <input type="radio"/>                | <input type="radio"/>             |

Overview of benign nevi patterns: Peripheral reticular network with central hyperpigmentation  
 Below, please confirm your vote for EACH image if you agree that it is representative of this structure.

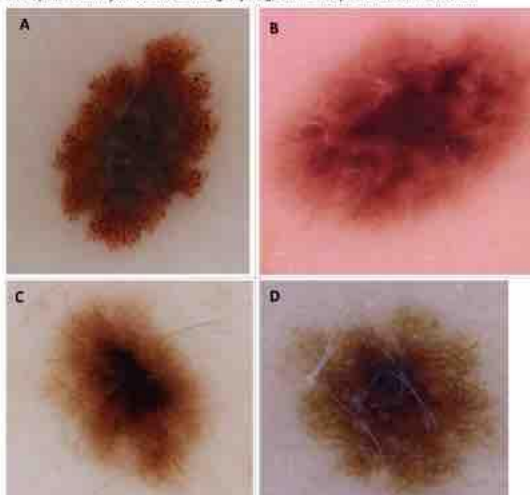

|                 |                                      |                                   |
|-----------------|--------------------------------------|-----------------------------------|
| Image A (73.1%) | NO, this image is NOT representative | YES, this image is representative |
|                 | <input type="radio"/>                | <input type="radio"/>             |
| Image B (88.5%) | <input type="radio"/>                | <input type="radio"/>             |
| Image C (100%)  | <input type="radio"/>                | <input type="radio"/>             |
| Image D (100%)  | <input type="radio"/>                | <input type="radio"/>             |

Overview of benign nevi patterns: Peripheral reticular network with central globules  
Below, please confirm your vote for EACH image if you agree that it is representative of this structure.

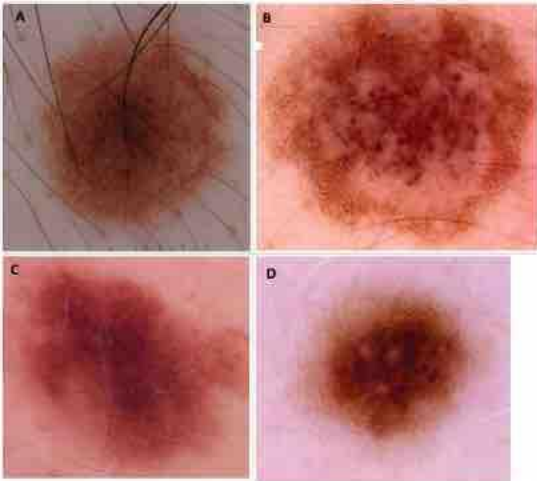

|                 | NO, this image is NOT representative | YES, this image IS representative |
|-----------------|--------------------------------------|-----------------------------------|
| Image A (100%)  | <input type="radio"/>                | <input type="radio"/>             |
| Image B (92.3%) | <input type="radio"/>                | <input type="radio"/>             |
| Image C (61.5%) | <input type="radio"/>                | <input type="radio"/>             |
| Image D (100%)  | <input type="radio"/>                | <input type="radio"/>             |

Overview of benign nevi patterns: Homogenous (tan, brown, blue, pink)  
Below, please confirm your vote for EACH image if you agree that it is representative of this structure.

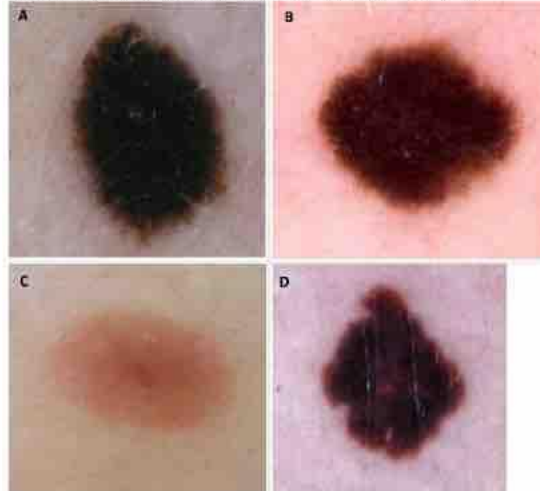

|                 | NO, this image is NOT representative | YES, this image IS representative |
|-----------------|--------------------------------------|-----------------------------------|
| Image A (80.8%) | <input type="radio"/>                | <input type="radio"/>             |
| Image B (73.1%) | <input type="radio"/>                | <input type="radio"/>             |
| Image C (88.5%) | <input type="radio"/>                | <input type="radio"/>             |
| Image D (80.8%) | <input type="radio"/>                | <input type="radio"/>             |

Overview of benign nevi patterns: Central network with evenly distributed peripheral globules  
Below, please confirm your vote for EACH image if you agree that it is representative of this structure.

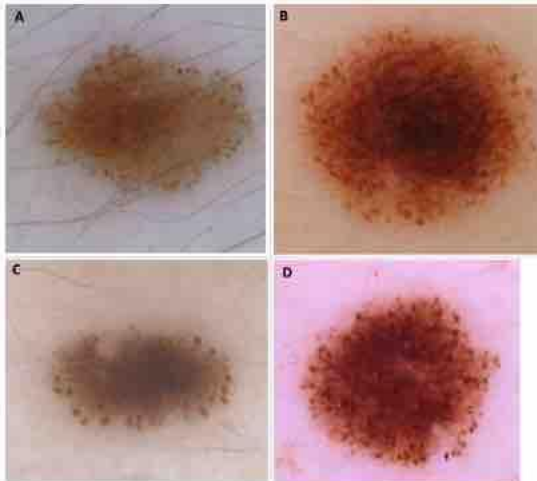

|                 | NO, this image is NOT representative | YES, this image IS representative |
|-----------------|--------------------------------------|-----------------------------------|
| Image A (96.2%) | <input type="radio"/>                | <input type="radio"/>             |
| Image B (96.2%) | <input type="radio"/>                | <input type="radio"/>             |
| Image C (88.5%) | <input type="radio"/>                | <input type="radio"/>             |
| Image D (84.6%) | <input type="radio"/>                | <input type="radio"/>             |

Overview of benign nevi patterns: Globular pattern  
Below, please confirm your vote for EACH image if you agree that it is representative of this structure.

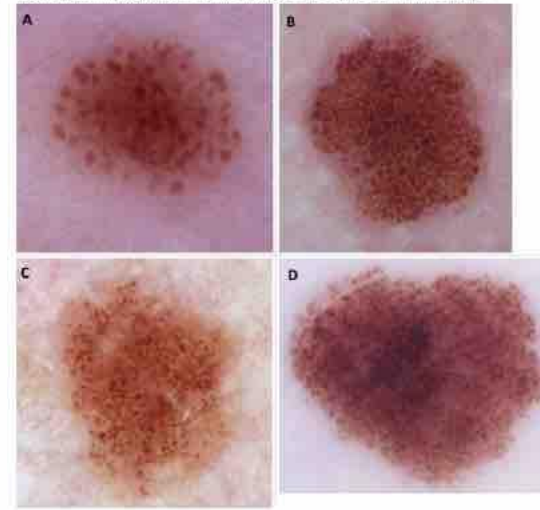

|                 | NO, this image is NOT representative | YES, this image IS representative |
|-----------------|--------------------------------------|-----------------------------------|
| Image A (100%)  | <input type="radio"/>                | <input type="radio"/>             |
| Image B (100%)  | <input type="radio"/>                | <input type="radio"/>             |
| Image C (100%)  | <input type="radio"/>                | <input type="radio"/>             |
| Image D (96.2%) | <input type="radio"/>                | <input type="radio"/>             |

Overview of benign nevi patterns: Two-component pattern  
 Below, please confirm your vote for EACH image if you agree that it is representative of this structure.

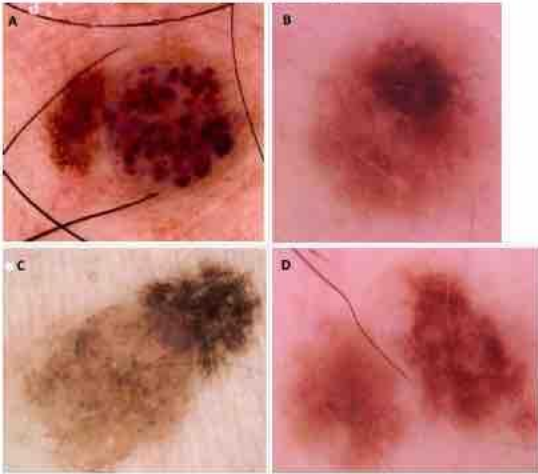

|                 |                                      |                                   |
|-----------------|--------------------------------------|-----------------------------------|
|                 | NO, this image is NOT representative | YES, this image IS representative |
| Image A (73.1%) | <input type="radio"/>                | <input type="radio"/>             |
| Image B (80.8%) | <input type="radio"/>                | <input type="radio"/>             |
| Image C (73.1%) | <input type="radio"/>                | <input type="radio"/>             |
| Image D (73.1%) | <input type="radio"/>                | <input type="radio"/>             |

Overview of benign nevi patterns: Two-component pattern [ADDITIONAL IMAGE]  
 Some panelists requested alternate images via write-in comments for "two-component pattern". In order to ensure adequate provision of exemplary teaching images for evaluation, we have included the following additional image.

Please rate how well you believe this image is representative of the indicated structure.

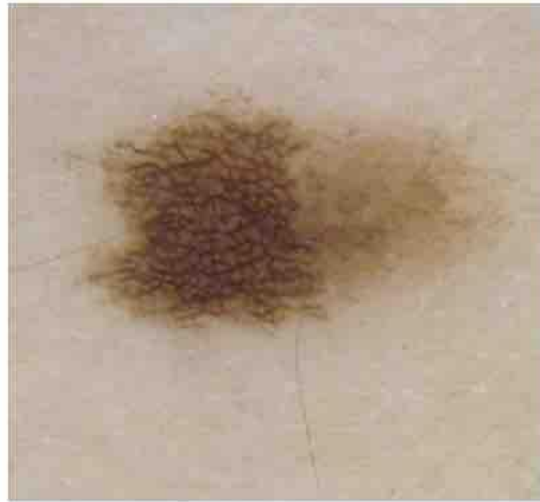

|                        |                       |                       |                       |                       |                       |
|------------------------|-----------------------|-----------------------|-----------------------|-----------------------|-----------------------|
|                        | Strongly disagree     | Disagree              | Neutral               | Agree                 | Strongly agree        |
| Additional image (NEW) | <input type="radio"/> |

**BENIGN MELANOCYTIC: Congenital melanocytic nevi**

The following structures reached consensus for this diagnosis: Cobblestone pattern / globular pattern, Reticular network, Diffuse background pigmentation, Hypertrichosisis, Perifollicular hyper/hypopigmentation.

To ensure agreement on representative teaching images for each structure, we have provided the percentage of panelists who voted "agree" or "strongly agree" for each.

Images with < 70% positive votes did not reach preliminary consensus and are indicated with red text.

Please confirm your vote to finalize the decision on inclusion / exclusion of images as representative of each structure.

Congenital melanocytic nevi: Cobblestone pattern / globular pattern  
 Below, please confirm your vote for EACH image if you agree that it is representative of this structure.

Overview of benign nevi patterns: Symmetric multi-component pattern  
 Below, please confirm your vote for EACH image if you agree that it is representative of this structure.

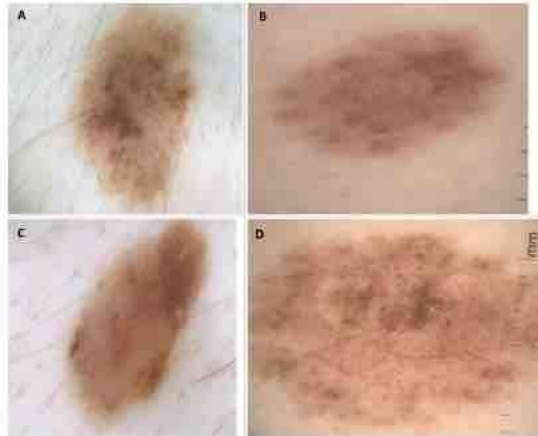

|                 |                                      |                                   |
|-----------------|--------------------------------------|-----------------------------------|
|                 | NO, this image is NOT representative | YES, this image IS representative |
| Image A (65.4%) | <input type="radio"/>                | <input type="radio"/>             |
| Image B (76.9%) | <input type="radio"/>                | <input type="radio"/>             |
| Image C (53.8%) | <input type="radio"/>                | <input type="radio"/>             |
| Image D (80.8%) | <input type="radio"/>                | <input type="radio"/>             |

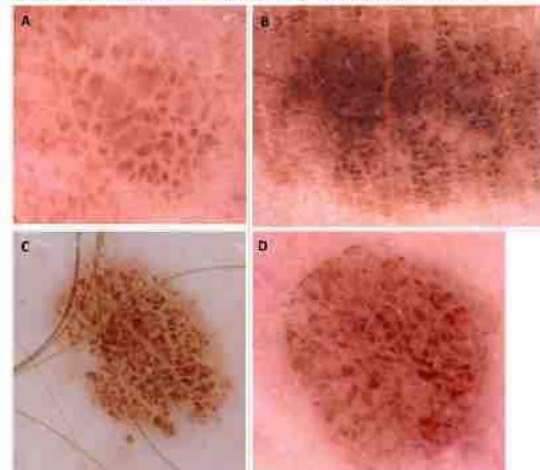

|                 | NO, this image is NOT representative | YES, this image is representative |
|-----------------|--------------------------------------|-----------------------------------|
| Image A (96.2%) | <input type="radio"/>                | <input type="radio"/>             |
| Image B (84.6%) | <input type="radio"/>                | <input type="radio"/>             |
| Image C (100%)  | <input type="radio"/>                | <input type="radio"/>             |
| Image D (88.5%) | <input type="radio"/>                | <input type="radio"/>             |

Congenital melanocytic nevi: Reticular network  
Below, please confirm your vote for EACH image if you agree that it is representative of this structure.

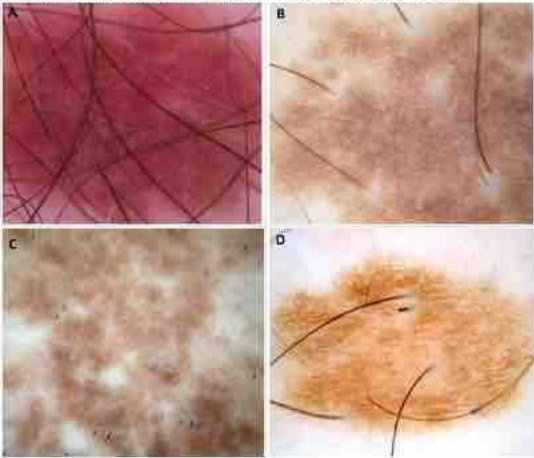

|                 | NO, this image is NOT representative | YES, this image is representative |
|-----------------|--------------------------------------|-----------------------------------|
| Image A (80.8%) | <input type="radio"/>                | <input type="radio"/>             |
| Image B (92.3%) | <input type="radio"/>                | <input type="radio"/>             |
| Image C (69.2%) | <input type="radio"/>                | <input type="radio"/>             |
| Image D (100%)  | <input type="radio"/>                | <input type="radio"/>             |

Congenital melanocytic nevi: Diffuse background pigmentation  
Below, please confirm your vote for EACH image if you agree that it is representative of this structure.

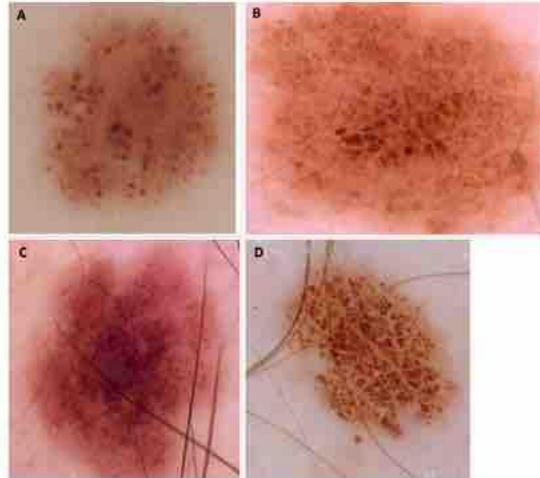

|                 | NO, this image is NOT representative | YES, this image is representative |
|-----------------|--------------------------------------|-----------------------------------|
| Image A (76.9%) | <input type="radio"/>                | <input type="radio"/>             |
| Image B (61.5%) | <input type="radio"/>                | <input type="radio"/>             |
| Image C (53.8%) | <input type="radio"/>                | <input type="radio"/>             |
| Image D (61.5%) | <input type="radio"/>                | <input type="radio"/>             |

Congenital melanocytic nevi: Diffuse background pigmentation [ADDITIONAL IMAGES]  
Less than 50% of the offered images reached preliminary consensus for 'diffuse background pigmentation'. In order to ensure adequate provision of exemplary teaching images for evaluation, we have included the following additional images.

Please rate how well you believe EACH image is representative of the indicated structure.

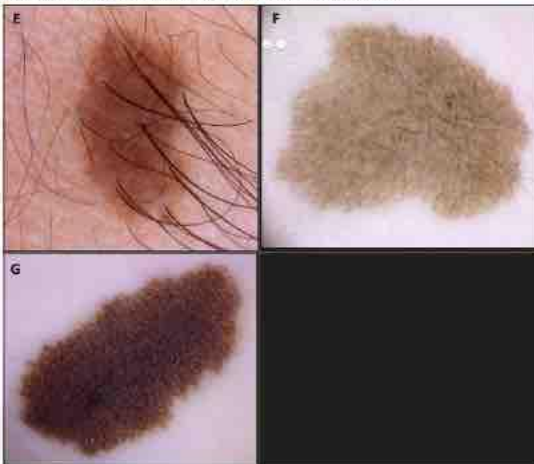

|               | Strongly disagree     | Disagree              | Neutral               | Agree                 | Strongly agree        |
|---------------|-----------------------|-----------------------|-----------------------|-----------------------|-----------------------|
| Image E (NEW) | <input type="radio"/> |
| Image F (NEW) | <input type="radio"/> |
| Image G (NEW) | <input type="radio"/> |

Congenital melanocytic nevi: Hypertrichosis  
Below, please confirm your vote for EACH image if you agree that it is representative of this structure.

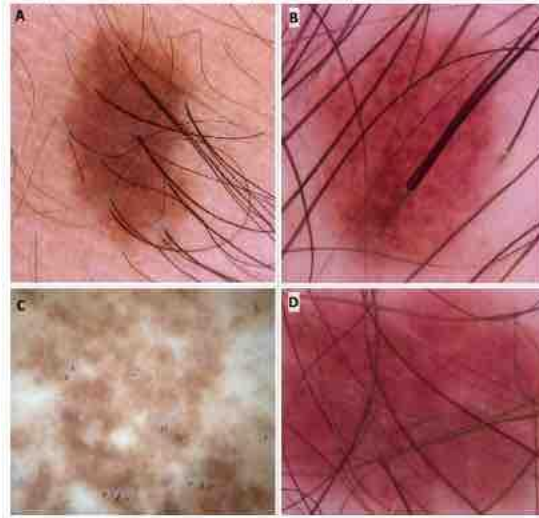

|                 | NO, this image is NOT representative | YES, this image is representative |
|-----------------|--------------------------------------|-----------------------------------|
| Image A (100%)  | <input type="radio"/>                | <input type="radio"/>             |
| Image B (76.9%) | <input type="radio"/>                | <input type="radio"/>             |
| Image C (73.1%) | <input type="radio"/>                | <input type="radio"/>             |
| Image D (58%)   | <input type="radio"/>                | <input type="radio"/>             |

**BENIGN MELANOCYTIC: Intradermal nevus**  
 The following structures reached consensus for this diagnosis: Comma-shaped (curved) blood vessels, Homogenous (structureless) brown/tan pigmentation.

To ensure agreement on representative teaching images for each structure, we have provided the percentage of panelists who voted "agree" or "strongly agree" for each.

Images with < 70% positive votes did not reach preliminary consensus and are indicated with red text.

Please confirm your vote to finalize the decision on inclusion / exclusion of images as representative of each structure.

Intradermal nevus: Comma-shaped (curved) blood vessels  
 Below, please confirm your vote for EACH image if you agree that it is representative of this structure.

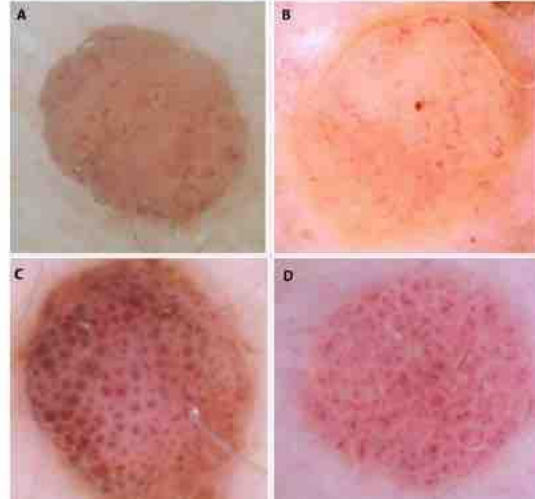

Congenital melanocytic nevus: Perifollicular hyperpigmentation  
 Below, please confirm your vote for EACH image if you agree that it is representative of this structure.

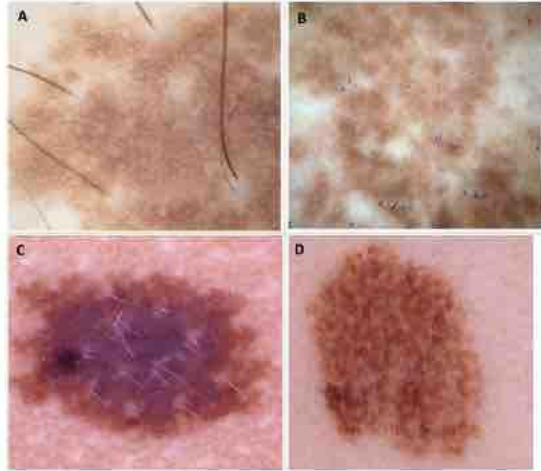

|                 | NO, this image is NOT representative | YES, this image IS representative |
|-----------------|--------------------------------------|-----------------------------------|
| Image A (100%)  | <input type="radio"/>                | <input type="radio"/>             |
| Image B (88.5%) | <input type="radio"/>                | <input type="radio"/>             |
| Image C (92.3%) | <input type="radio"/>                | <input type="radio"/>             |
| Image D (73.1%) | <input type="radio"/>                | <input type="radio"/>             |

Page 84

|                 | NO, this image is NOT representative | YES, this image IS representative |
|-----------------|--------------------------------------|-----------------------------------|
| Image A (100%)  | <input type="radio"/>                | <input type="radio"/>             |
| Image B (92.3%) | <input type="radio"/>                | <input type="radio"/>             |
| Image C (61.5%) | <input type="radio"/>                | <input type="radio"/>             |
| Image D (92.3%) | <input type="radio"/>                | <input type="radio"/>             |

Intradermal nevus: Homogenous (structureless) brown / tan pigmentation  
 Below, please confirm your vote for EACH image if you agree that it is representative of this structure.

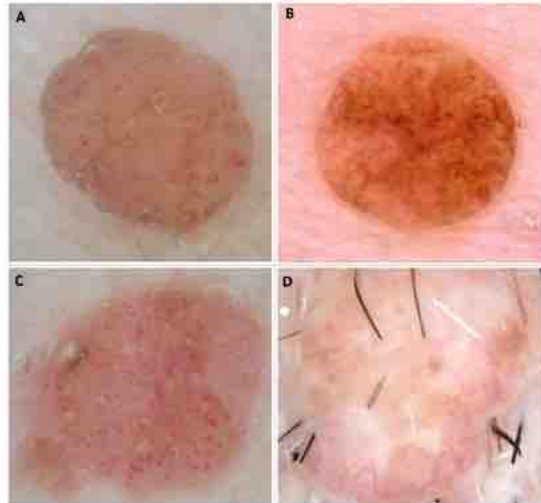

|                 | NO, this image is NOT representative | YES, this image IS representative |
|-----------------|--------------------------------------|-----------------------------------|
| Image A (96.2%) | <input type="radio"/>                | <input type="radio"/>             |
| Image B (80.8%) | <input type="radio"/>                | <input type="radio"/>             |
| Image C (76.9%) | <input type="radio"/>                | <input type="radio"/>             |
| Image D (89.8%) | <input type="radio"/>                | <input type="radio"/>             |



**BENIGN MELANOCYTIC: Blue nevus**  
 The following structure reached consensus for this diagnosis: Homogenous blue pigmentation

To ensure agreement on representative teaching images for this structure, we have provided the percentage of panelists who voted "agree" or "strongly agree".

Images with < 70% positive votes did not reach preliminary consensus and are indicated with red text.

Please confirm your vote to finalize the decision on inclusion / exclusion of images as representative of this structure.

Blue nevus: Homogenous blue pigmentation  
 Below, please confirm your vote for EACH image if you agree that it is representative of this structure.

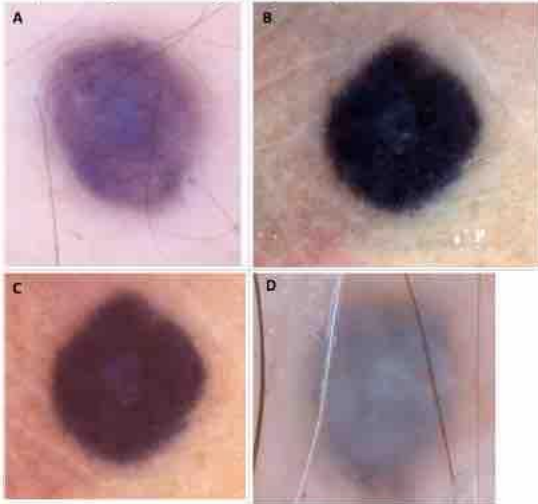

|                 | NO, this image is NOT representative | YES, this image IS representative |
|-----------------|--------------------------------------|-----------------------------------|
| Image A (92.3%) | <input type="radio"/>                | <input type="radio"/>             |
| Image B (84.6%) | <input type="radio"/>                | <input type="radio"/>             |
| Image C (86.5%) | <input type="radio"/>                | <input type="radio"/>             |
| Image D (96.2%) | <input type="radio"/>                | <input type="radio"/>             |

**BENIGN MELANOCYTIC: Spitz nevus**  
 The following structures reached consensus for this diagnosis: Vascular pattern (pink homogenous with dotted vessels), Starburst pattern (with tiered globules / streaks) (radial streaming), Negative network (reticular depigmentation), White shiny lines (crystalline structures)

To ensure agreement on representative teaching images for each structure, we have provided the percentage of panelists who voted "agree" or "strongly agree" for each.

Images with < 70% positive votes did not reach preliminary consensus and are indicated with red text.

Please confirm your vote to finalize the decision on inclusion / exclusion of images as representative of each structure.

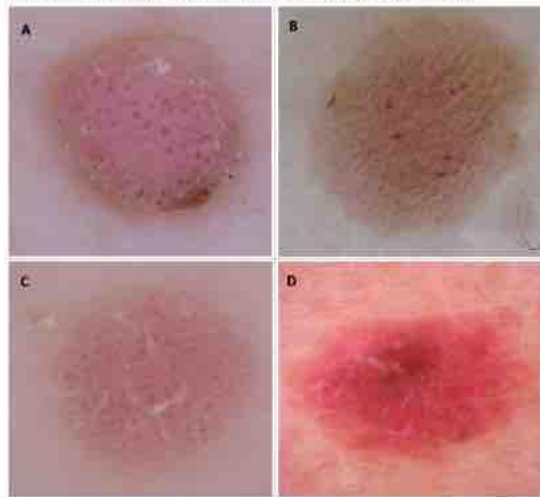

|                 | NO, this image is NOT representative | YES, this image IS representative |
|-----------------|--------------------------------------|-----------------------------------|
| Image A (92.3%) | <input type="radio"/>                | <input type="radio"/>             |
| Image B (38.5%) | <input type="radio"/>                | <input type="radio"/>             |
| Image C (100%)  | <input type="radio"/>                | <input type="radio"/>             |
| Image D (58%)   | <input type="radio"/>                | <input type="radio"/>             |

Spitz nevus: Starburst pattern (with tiered globules / streaks) (radial streaming)  
 Below, please confirm your vote for EACH image if you agree that it is representative of this structure.

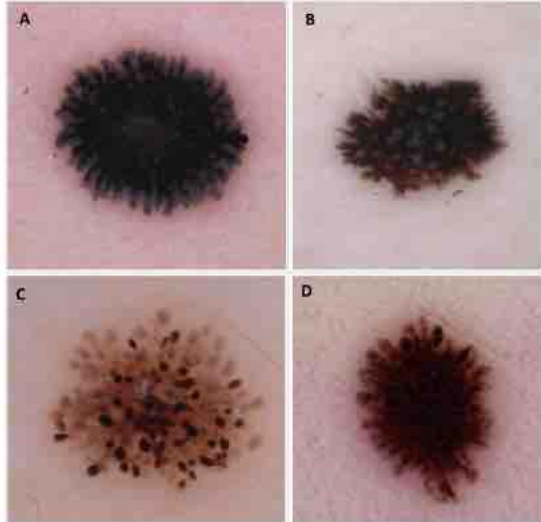

|                 | NO, this image is NOT representative | YES, this image IS representative |
|-----------------|--------------------------------------|-----------------------------------|
| Image A (100%)  | <input type="radio"/>                | <input type="radio"/>             |
| Image B (100%)  | <input type="radio"/>                | <input type="radio"/>             |
| Image C (80.8%) | <input type="radio"/>                | <input type="radio"/>             |
| Image D (96.2%) | <input type="radio"/>                | <input type="radio"/>             |

Spitz nevus: Negative network (reticular depigmentation)  
 Below, please confirm your vote for EACH image if you agree that it is representative of this structure.

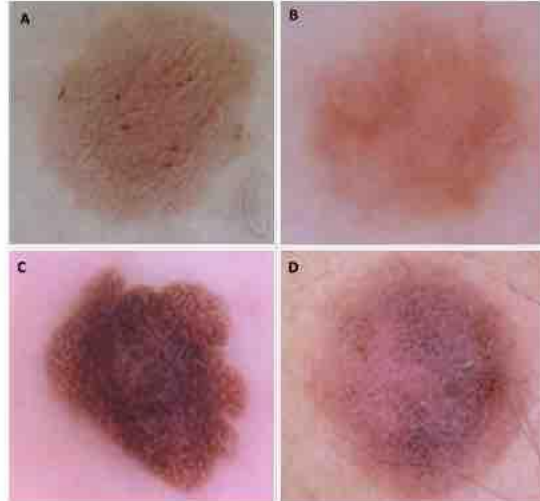

|                 | NO, this image is NOT representative | YES, this image IS representative |
|-----------------|--------------------------------------|-----------------------------------|
| Image A (98.2%) | <input type="radio"/>                | <input type="radio"/>             |
| Image B (88.5%) | <input type="radio"/>                | <input type="radio"/>             |
| Image C (96.2%) | <input type="radio"/>                | <input type="radio"/>             |
| Image D (96.2%) | <input type="radio"/>                | <input type="radio"/>             |

**BENIGN MELANOCYTIC: Recurrent (persistent) nevus**

The following structure reached consensus for this diagnosis: Pigment within the scar, not extending beyond

To ensure agreement on representative teaching images for this structure, we have provided the percentage of panelists who voted "agree" or "strongly agree".

Images with < 70% positive votes did not reach preliminary consensus and are indicated with red text.

Please confirm your vote to finalize the decision on inclusion / exclusion of images as representative of this structure.

Recurrent (persistent) nevus: Pigment within the scar, not extending beyond  
 Below, please confirm your vote for EACH image if you agree that it is representative of this structure.

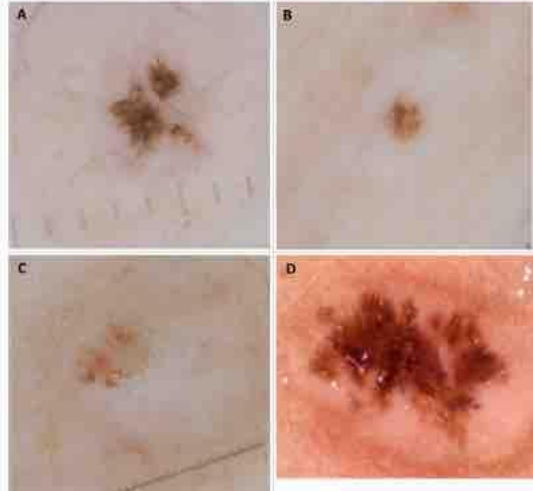

Spitz nevus: White shiny lines (crystalline structures)  
 Below, please confirm your vote for EACH image if you agree that it is representative of this structure.

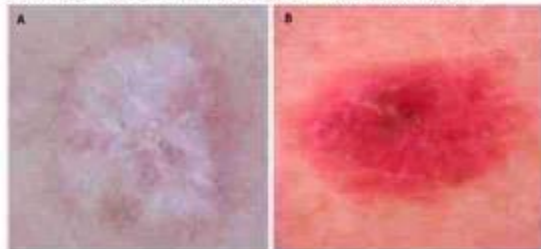

|                 | NO, this image is NOT representative | YES, this image IS representative |
|-----------------|--------------------------------------|-----------------------------------|
| Image A (100%)  | <input type="radio"/>                | <input type="radio"/>             |
| Image B (92.3%) | <input type="radio"/>                | <input type="radio"/>             |

**MELANOMA: Overview of melanoma characteristics**

The following structures reached consensus for this diagnosis: Atypical pigment network, Blue structures (blue-white veil, blue-gray structures), Whiny shiny lines (crystalline structures), Negative network, Irregular dots / globules, Irregular streaks (radial streaming, pseudopods), Regression structures (white scar-like area and/or peppering), Peripheral brown structureless area, Angulated lines (extrafacial), Atypical vascular pattern, polymorphous vessels (2+ types of blood vessels, e.g. linear irregular and dotted vessels), Atypical blotch.

To ensure agreement on representative teaching images for each structure, we have provided the percentage of panelists who voted "agree" or "strongly agree" for each.

Images with < 70% positive votes did not reach preliminary consensus and are indicated with red text.

Please confirm your vote to finalize the decision on inclusion / exclusion of images as representative of each structure.

|                 | NO, this image is NOT representative | YES, this image is representative |
|-----------------|--------------------------------------|-----------------------------------|
| Image A (84.6%) | <input type="radio"/>                | <input type="radio"/>             |
| Image B (100%)  | <input type="radio"/>                | <input type="radio"/>             |
| Image C (92.3%) | <input type="radio"/>                | <input type="radio"/>             |
| Image D (80.8%) | <input type="radio"/>                | <input type="radio"/>             |

**Overview of melanoma characteristics: Atypical pigment network**  
Below, please confirm your vote for EACH image if you agree that it is representative of this structure.

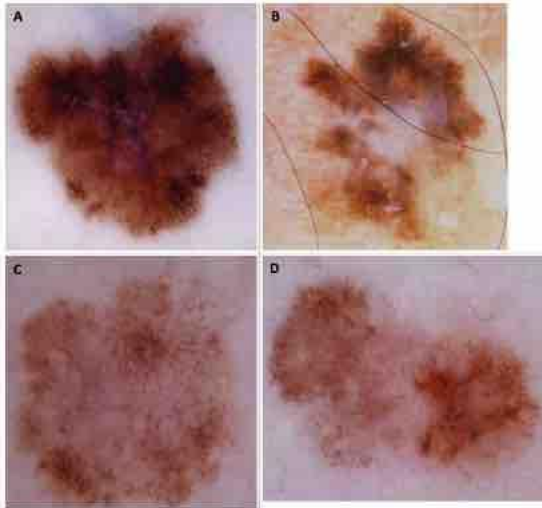

|                 | NO, this image is NOT representative | YES, this image is representative |
|-----------------|--------------------------------------|-----------------------------------|
| Image A (84.6%) | <input type="radio"/>                | <input type="radio"/>             |
| Image B (92.3%) | <input type="radio"/>                | <input type="radio"/>             |
| Image C (100%)  | <input type="radio"/>                | <input type="radio"/>             |
| Image D (100%)  | <input type="radio"/>                | <input type="radio"/>             |

**Overview of melanoma characteristics: Blue structures (blue-white veil, blue-gray structures)**  
Below, please confirm your vote for EACH image if you agree that it is representative of this structure.

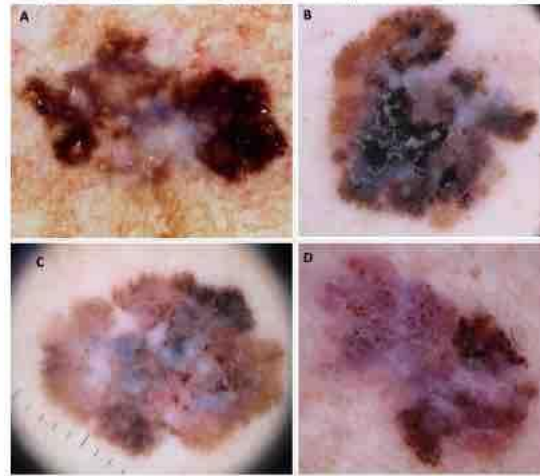

|                 | NO, this image is NOT representative | YES, this image is representative |
|-----------------|--------------------------------------|-----------------------------------|
| Image A (96.2%) | <input type="radio"/>                | <input type="radio"/>             |
| Image B (100%)  | <input type="radio"/>                | <input type="radio"/>             |
| Image C (100%)  | <input type="radio"/>                | <input type="radio"/>             |
| Image D (100%)  | <input type="radio"/>                | <input type="radio"/>             |

**Overview of melanoma characteristics: White shiny lines (crystalline structures)**  
Below, please confirm your vote for EACH image if you agree that it is representative of this structure.

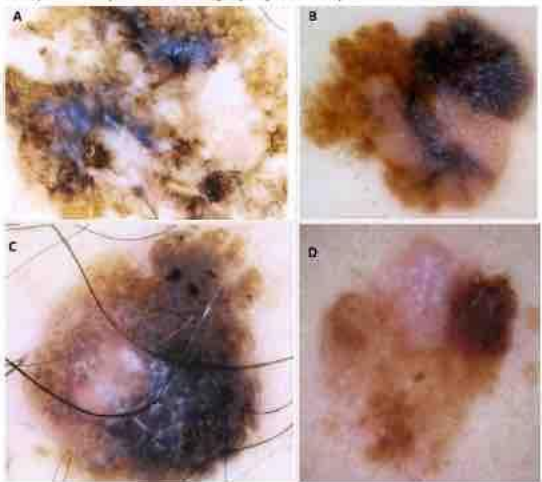

|                | NO, this image is NOT representative | YES, this image is representative |
|----------------|--------------------------------------|-----------------------------------|
| Image A (100%) | <input type="radio"/>                | <input type="radio"/>             |
| Image B (100%) | <input type="radio"/>                | <input type="radio"/>             |
| Image C (100%) | <input type="radio"/>                | <input type="radio"/>             |
| Image D (100%) | <input type="radio"/>                | <input type="radio"/>             |

**Overview of melanoma characteristics: Negative network**  
Below, please confirm your vote for EACH image if you agree that it is representative of this structure.

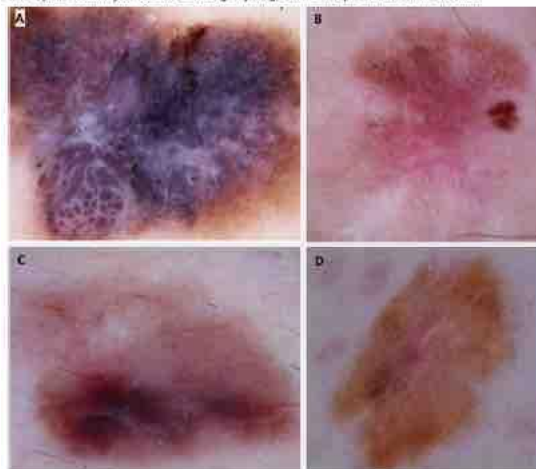

|                 | NO, this image is NOT representative | YES, this image is representative |
|-----------------|--------------------------------------|-----------------------------------|
| Image A (100%)  | <input type="radio"/>                | <input type="radio"/>             |
| Image B (100%)  | <input type="radio"/>                | <input type="radio"/>             |
| Image C (100%)  | <input type="radio"/>                | <input type="radio"/>             |
| Image D (96.2%) | <input type="radio"/>                | <input type="radio"/>             |

Overview of melanoma characteristics: Irregular dots / globules  
Below, please confirm your vote for EACH image if you agree that it is representative of this structure.

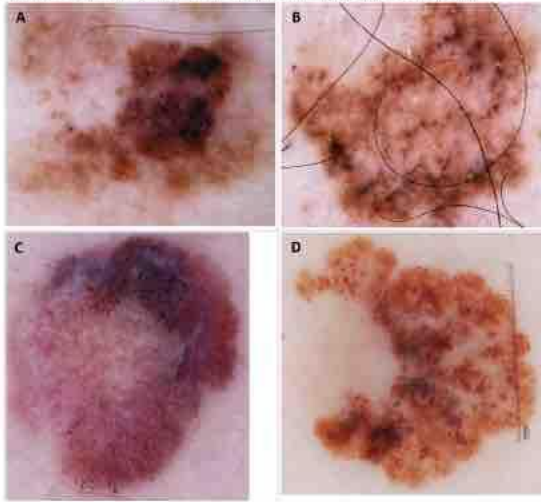

|                 | NO, this image is NOT representative | YES, this image IS representative |
|-----------------|--------------------------------------|-----------------------------------|
| Image A (100%)  | <input type="radio"/>                | <input type="radio"/>             |
| Image B (100%)  | <input type="radio"/>                | <input type="radio"/>             |
| Image C (100%)  | <input type="radio"/>                | <input type="radio"/>             |
| Image D (96.2%) | <input type="radio"/>                | <input type="radio"/>             |

Overview of melanoma characteristics: Irregular streaks (radial streaming, pseudopods)  
Below, please confirm your vote for EACH image if you agree that it is representative of this structure.

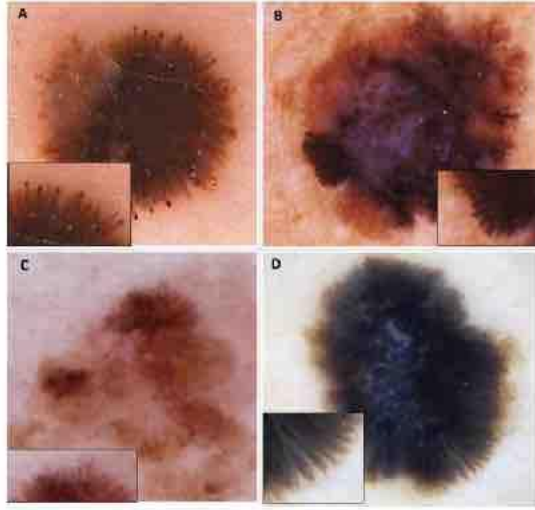

|                | NO, this image is NOT representative | YES, this image IS representative |
|----------------|--------------------------------------|-----------------------------------|
| Image A (100%) | <input type="radio"/>                | <input type="radio"/>             |
| Image B (100%) | <input type="radio"/>                | <input type="radio"/>             |
| Image C (100%) | <input type="radio"/>                | <input type="radio"/>             |
| Image D (100%) | <input type="radio"/>                | <input type="radio"/>             |

Overview of melanoma characteristics: Regression structures (white scar-like area and/or peppering)  
Below, please confirm your vote for EACH image if you agree that it is representative of this structure.

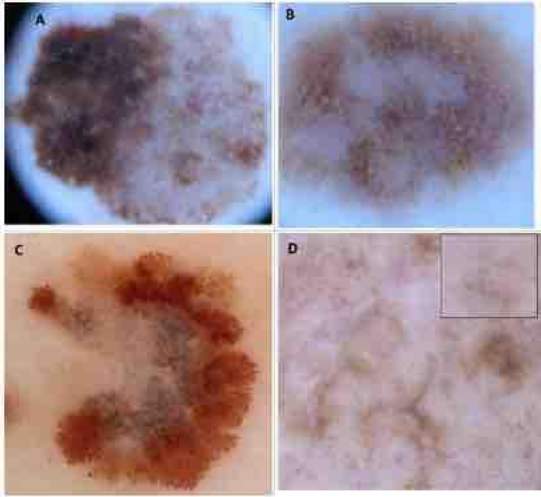

|                 | NO, this image is NOT representative | YES, this image IS representative |
|-----------------|--------------------------------------|-----------------------------------|
| Image A (94.6%) | <input type="radio"/>                | <input type="radio"/>             |
| Image B (88.5%) | <input type="radio"/>                | <input type="radio"/>             |
| Image C (100%)  | <input type="radio"/>                | <input type="radio"/>             |
| Image D (100%)  | <input type="radio"/>                | <input type="radio"/>             |

Overview of melanoma characteristics: Peripheral brown structureless area  
Below, please confirm your vote for EACH image if you agree that it is representative of this structure.

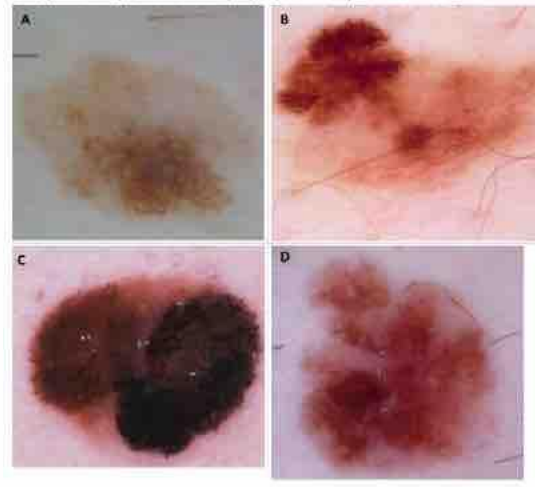

|                 | NO, this image is NOT representative | YES, this image IS representative |
|-----------------|--------------------------------------|-----------------------------------|
| Image A (96.2%) | <input type="radio"/>                | <input type="radio"/>             |
| Image B (96.2%) | <input type="radio"/>                | <input type="radio"/>             |
| Image C (80.8%) | <input type="radio"/>                | <input type="radio"/>             |
| Image D (92.3%) | <input type="radio"/>                | <input type="radio"/>             |

Overview of melanoma characteristics: Angulated lines (extrafocal)  
Below, please confirm your vote for EACH image if you agree that it is representative of this structure.

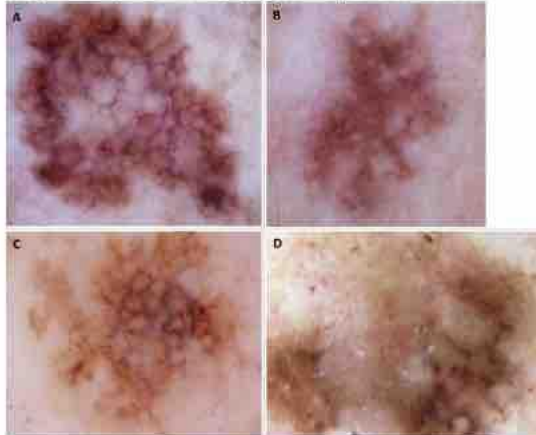

|                 | NO, this image is NOT representative | YES, this image IS representative |
|-----------------|--------------------------------------|-----------------------------------|
| Image A (100%)  | <input type="radio"/>                | <input type="radio"/>             |
| Image B (80.8%) | <input type="radio"/>                | <input type="radio"/>             |
| Image C (100%)  | <input type="radio"/>                | <input type="radio"/>             |
| Image D (88.5%) | <input type="radio"/>                | <input type="radio"/>             |

Overview of melanoma characteristics: Atypical vascular pattern, polymorphous vessels (2+ types of blood vessels, e.g. linear (irregular and dotted vessels))  
Below, please confirm your vote for EACH image if you agree that it is representative of this structure.

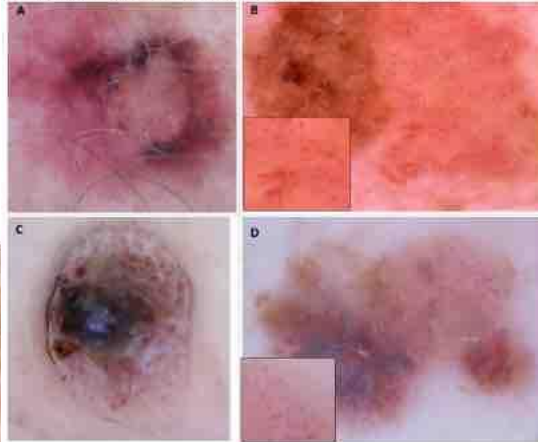

|                 | NO, this image is NOT representative | YES, this image IS representative |
|-----------------|--------------------------------------|-----------------------------------|
| Image A (96.2%) | <input type="radio"/>                | <input type="radio"/>             |
| Image B (100%)  | <input type="radio"/>                | <input type="radio"/>             |
| Image C (84.8%) | <input type="radio"/>                | <input type="radio"/>             |
| Image D (100%)  | <input type="radio"/>                | <input type="radio"/>             |

#### MELANOMA: Acral lentiginous melanoma

The following structures reached consensus for this diagnosis: Parallel ridge pattern, irregular diffuse pigmentation, Multicomponent pattern, Atypical fibrillar pattern.

To ensure agreement on representative teaching images for each structure, we have provided the percentage of panelists who voted "agree" or "strongly agree" for each.

Images with < 70% positive votes did not reach preliminary consensus and are indicated with red text.

Please confirm your vote to finalize the decision on inclusion / exclusion of images as representative of each structure.

Acral lentiginous melanoma: Parallel ridge pattern  
Below, please confirm your vote for EACH image if you agree that it is representative of this structure.

Overview of melanoma characteristics: Atypical blotch  
Below, please confirm your vote for EACH image if you agree that it is representative of this structure.

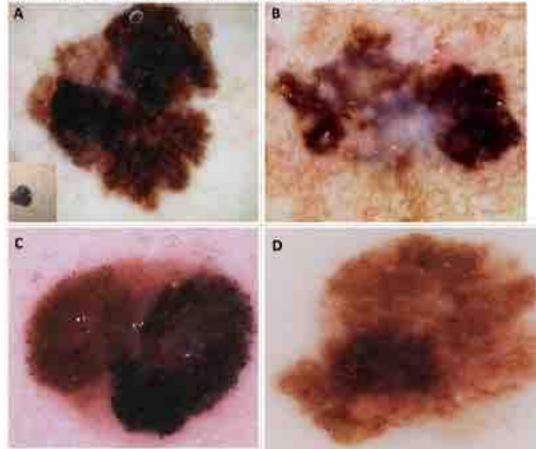

|                 | NO, this image is NOT representative | YES, this image IS representative |
|-----------------|--------------------------------------|-----------------------------------|
| Image A (100%)  | <input type="radio"/>                | <input type="radio"/>             |
| Image B (100%)  | <input type="radio"/>                | <input type="radio"/>             |
| Image C (92.3%) | <input type="radio"/>                | <input type="radio"/>             |
| Image D (96.2%) | <input type="radio"/>                | <input type="radio"/>             |

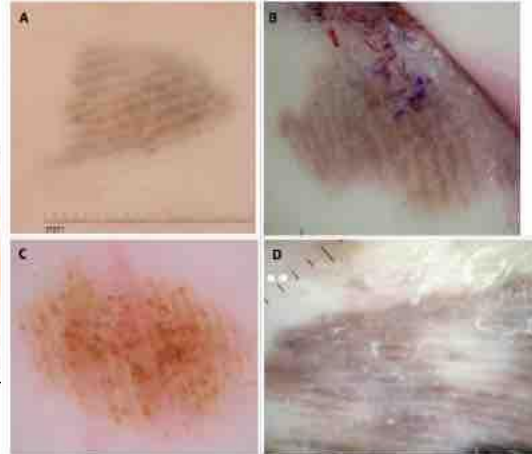

page 228

|                 | NO, this image is NOT representative | YES, this image IS representative |
|-----------------|--------------------------------------|-----------------------------------|
| Image A (100%)  | <input type="radio"/>                | <input type="radio"/>             |
| Image B (92.3%) | <input type="radio"/>                | <input type="radio"/>             |
| Image C (96.2%) | <input type="radio"/>                | <input type="radio"/>             |
| Image D (100%)  | <input type="radio"/>                | <input type="radio"/>             |

Acral lentiginous melanoma: Irregular diffuse pigmentation  
Below, please confirm your vote for EACH image if you agree that it is representative of this structure.

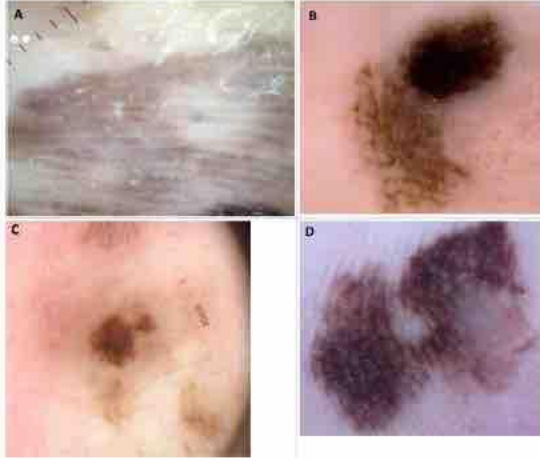

|                 | NO, this image is NOT representative | YES, this image IS representative |
|-----------------|--------------------------------------|-----------------------------------|
| Image A (84.6%) | <input type="radio"/>                | <input type="radio"/>             |
| Image B (84.6%) | <input type="radio"/>                | <input type="radio"/>             |
| Image C (92.3%) | <input type="radio"/>                | <input type="radio"/>             |
| Image D (96.2%) | <input type="radio"/>                | <input type="radio"/>             |

Acral lentiginous melanoma: Multicomponent pattern  
Below, please confirm your vote for EACH image if you agree that it is representative of this structure.

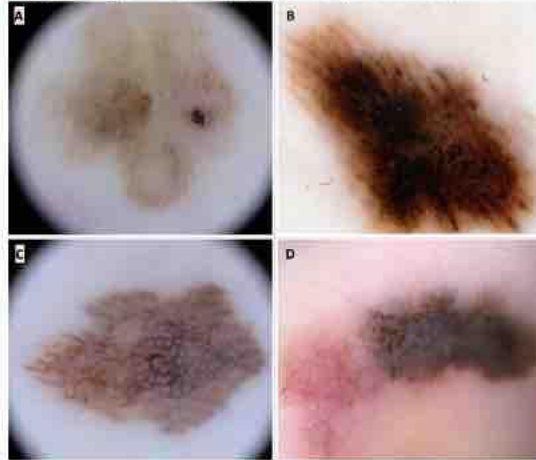

|                 | NO, this image is NOT representative | YES, this image IS representative |
|-----------------|--------------------------------------|-----------------------------------|
| Image A (96.2%) | <input type="radio"/>                | <input type="radio"/>             |
| Image B (88.5%) | <input type="radio"/>                | <input type="radio"/>             |
| Image C (100%)  | <input type="radio"/>                | <input type="radio"/>             |
| Image D (96.2%) | <input type="radio"/>                | <input type="radio"/>             |

Acral lentiginous melanoma: Atypical fibrillar pattern  
Below, please confirm your vote for EACH image if you agree that it is representative of this structure.

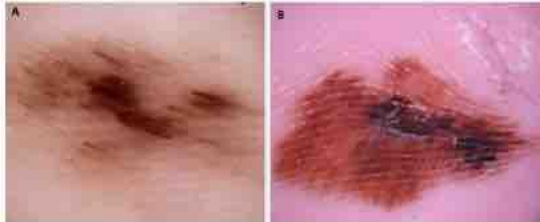

|                 | NO, this image is NOT representative | YES, this image IS representative |
|-----------------|--------------------------------------|-----------------------------------|
| Image A (96.2%) | <input type="radio"/>                | <input type="radio"/>             |
| Image B (92.3%) | <input type="radio"/>                | <input type="radio"/>             |

**MELANOMA: Lentigo maligna melanoma (melanoma on chronically sun-damaged skin of head/neck)**  
The following structures reached consensus for this diagnosis: Annular-granular pattern (gray dots around follicular openings), Asymmetric pigmentation around follicular openings, Rhomboidal structures (angulated lines), Circle within a circle (isobar), Dark blotches with or without obliterated hair follicles.  
To ensure agreement on representative teaching images for each structure, we have provided the percentage of panelists who voted "agree" or "strongly agree" for each.  
Images with < 70% positive votes did not reach preliminary consensus and are indicated with red text.  
Please confirm your vote to finalize the decision on inclusion / exclusion of images as representative of each structure.

Lentigo maligna melanoma: Annular-granular pattern (gray dots around follicular openings)  
 Below, please confirm your vote for EACH image if you agree that it is representative of this structure.

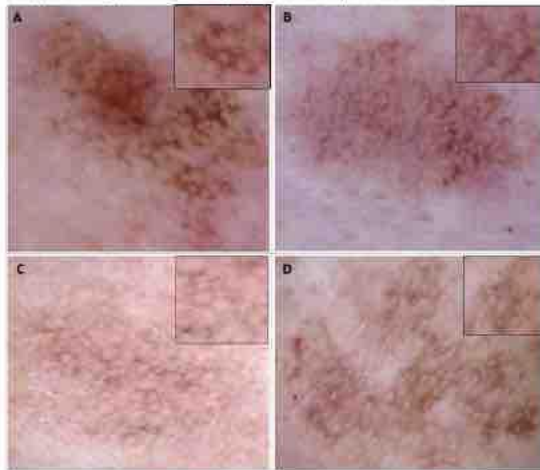

|                 | NO, this image is NOT representative | YES, this image IS representative |
|-----------------|--------------------------------------|-----------------------------------|
| Image A (96.2%) | <input type="radio"/>                | <input type="radio"/>             |
| Image B (88.5%) | <input type="radio"/>                | <input type="radio"/>             |
| Image C (92.3%) | <input type="radio"/>                | <input type="radio"/>             |
| Image D (84.6%) | <input type="radio"/>                | <input type="radio"/>             |

Lentigo maligna melanoma: Asymmetric pigmentation around follicular openings  
 Below, please confirm your vote for EACH image if you agree that it is representative of this structure.

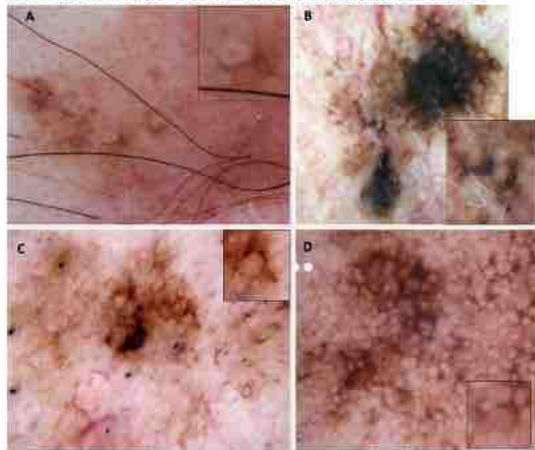

|                 | NO, this image is NOT representative | YES, this image IS representative |
|-----------------|--------------------------------------|-----------------------------------|
| Image A (100%)  | <input type="radio"/>                | <input type="radio"/>             |
| Image B (88.5%) | <input type="radio"/>                | <input type="radio"/>             |
| Image C (100%)  | <input type="radio"/>                | <input type="radio"/>             |
| Image D (92.3%) | <input type="radio"/>                | <input type="radio"/>             |

Lentigo maligna melanoma: Rhomboidal structures (angulated lines)  
 Below, please confirm your vote for EACH image if you agree that it is representative of this structure.

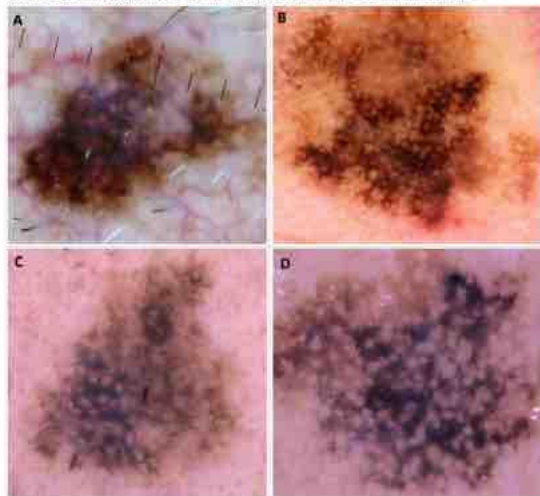

|                 | NO, this image is NOT representative | YES, this image IS representative |
|-----------------|--------------------------------------|-----------------------------------|
| Image A (80.8%) | <input type="radio"/>                | <input type="radio"/>             |
| Image B (76.3%) | <input type="radio"/>                | <input type="radio"/>             |
| Image C (96.2%) | <input type="radio"/>                | <input type="radio"/>             |
| Image D (90.2%) | <input type="radio"/>                | <input type="radio"/>             |

Lentigo maligna melanoma: Circle within a circle (isobar)  
 Below, please confirm your vote for EACH image if you agree that it is representative of this structure.

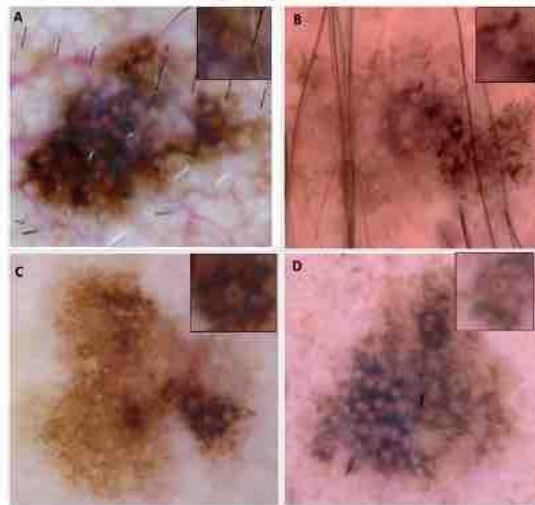

|                 | NO, this image is NOT representative | YES, this image IS representative |
|-----------------|--------------------------------------|-----------------------------------|
| Image A (92.3%) | <input type="radio"/>                | <input type="radio"/>             |
| Image B (76.9%) | <input type="radio"/>                | <input type="radio"/>             |
| Image C (73.1%) | <input type="radio"/>                | <input type="radio"/>             |
| Image D (88.5%) | <input type="radio"/>                | <input type="radio"/>             |

**MELANOMA: Amelanotic/hypomelanotic melanoma**

The following structures reached consensus for this diagnosis: Scar-like depigmentation, Milky red areas, White shiny lines (crystalline structures), Atypical vascular pattern, polymorphous vessels (2+ types of blood vessels, e.g. linear irregular and dotted vessels).

To ensure agreement on representative teaching images for each structure, we have provided the percentage of panelists who voted "agree" or "strongly agree" for each.

Images with < 70% positive votes did not reach preliminary consensus and are indicated with red text.

Please confirm your vote to finalize the decision on inclusion / exclusion of images as representative of each structure.

Amelanotic/hypomelanotic melanoma: Scar-like depigmentation  
Below, please confirm your vote for EACH image if you agree that it is representative of this structure.

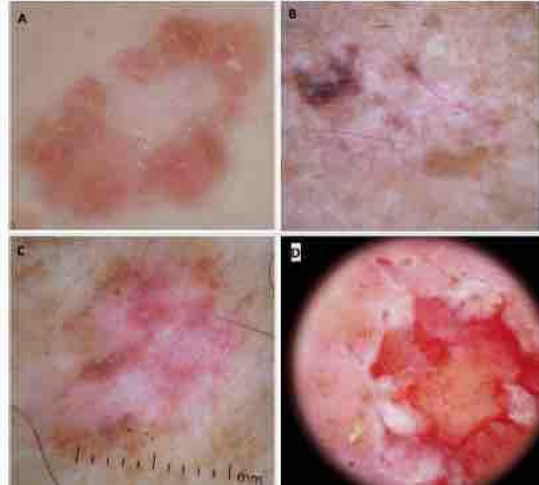

Lentigo maligna melanoma: Dark blotches with or without obliterated hair follicles  
Below, please confirm your vote for EACH image if you agree that it is representative of this structure.

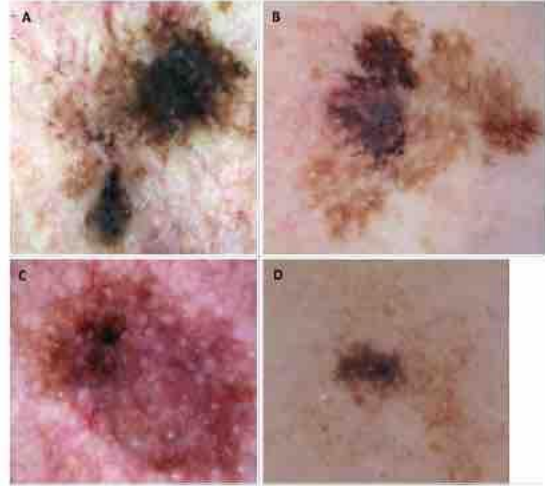

|                 | NO, this image is NOT representative | YES, this image IS representative |
|-----------------|--------------------------------------|-----------------------------------|
| Image A (100%)  | <input type="radio"/>                | <input type="radio"/>             |
| Image B (92.3%) | <input type="radio"/>                | <input type="radio"/>             |
| Image C (96.2%) | <input type="radio"/>                | <input type="radio"/>             |
| Image D (92.3%) | <input type="radio"/>                | <input type="radio"/>             |

|                 | NO, this image is NOT representative | YES, this image IS representative |
|-----------------|--------------------------------------|-----------------------------------|
| Image A (80.8%) | <input type="radio"/>                | <input type="radio"/>             |
| Image B (96.2%) | <input type="radio"/>                | <input type="radio"/>             |
| Image C (92.3%) | <input type="radio"/>                | <input type="radio"/>             |
| Image D (69.2%) | <input type="radio"/>                | <input type="radio"/>             |

Amelanotic/hypomelanotic melanoma: Scar-like depigmentation (additional image)  
Below, please confirm your vote for EACH image if you agree that it is representative of this structure.

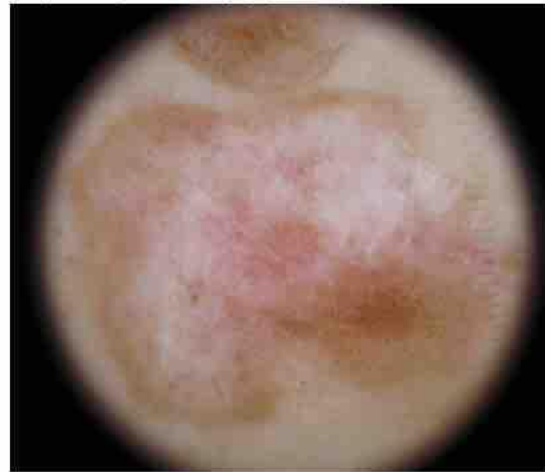

|                          | NO, this image is NOT representative | YES, this image IS representative |
|--------------------------|--------------------------------------|-----------------------------------|
| Additional image (88.5%) | <input type="radio"/>                | <input type="radio"/>             |

Amelanotic/hypomelanotic melanoma: Milky red areas  
Below, please confirm your vote for EACH image if you agree that it is representative of this structure.

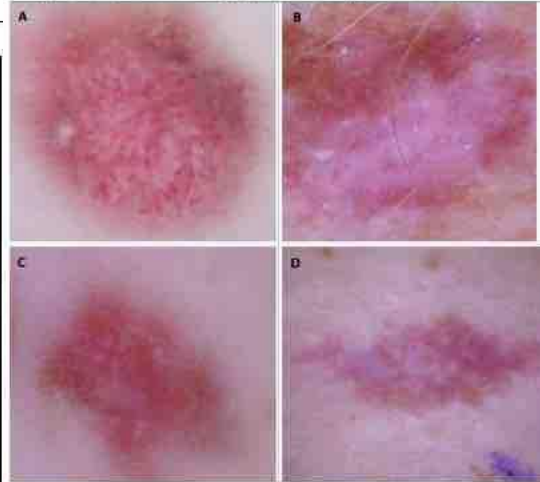

|                 | NO, this image is NOT representative | YES, this image IS representative |
|-----------------|--------------------------------------|-----------------------------------|
| Image A (84.6%) | <input type="radio"/>                | <input type="radio"/>             |
| Image B (84.6%) | <input type="radio"/>                | <input type="radio"/>             |
| Image C (92.3%) | <input type="radio"/>                | <input type="radio"/>             |
| Image D (88.5%) | <input type="radio"/>                | <input type="radio"/>             |



Amelanotic/hypomelanotic melanoma: Atypical vascular pattern, polymorphous vessels (2+ types of blood vessels, e.g. linear irregular and dotted vessels). Below, please confirm your vote for EACH image if you agree that it is representative of this structure.

Amelanotic/hypomelanotic melanoma: White shiny lines (crystalline structures). Below, please confirm your vote for EACH image if you agree that it is representative of this structure.

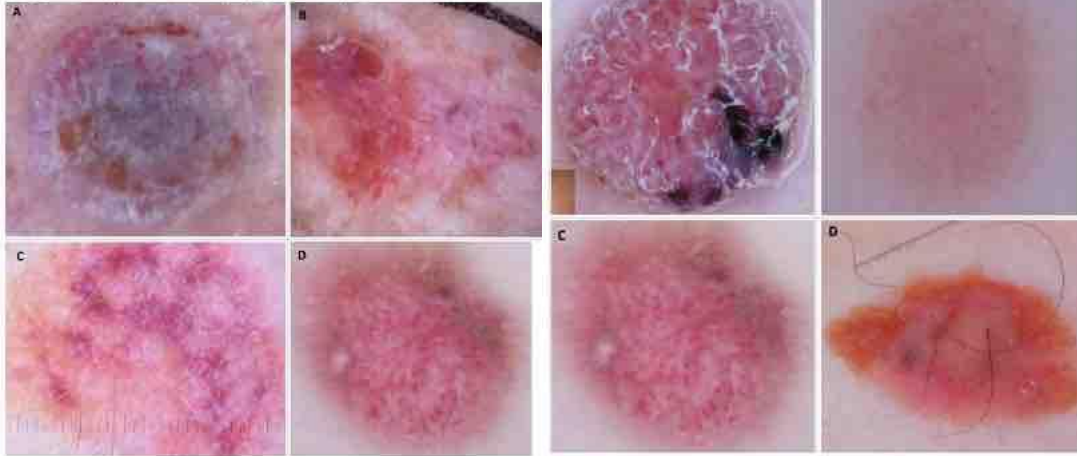

|                 |                                      |                                   |                 |                                      |                                   |
|-----------------|--------------------------------------|-----------------------------------|-----------------|--------------------------------------|-----------------------------------|
|                 | NO, this image is NOT representative | YES, this image IS representative |                 | NO, this image is NOT representative | YES, this image IS representative |
| Image A (96.2%) | <input type="radio"/>                | <input type="radio"/>             | Image A (80.8%) | <input type="radio"/>                | <input type="radio"/>             |
| Image B (96.2%) | <input type="radio"/>                | <input type="radio"/>             | Image B (50%)   | <input type="radio"/>                | <input type="radio"/>             |
| Image C (96.2%) | <input type="radio"/>                | <input type="radio"/>             | Image C (96.2%) | <input type="radio"/>                | <input type="radio"/>             |
| Image D (65.4%) | <input type="radio"/>                | <input type="radio"/>             | Image D (69.2%) | <input type="radio"/>                | <input type="radio"/>             |

**SPECIAL SITES / OTHER: Dermoscopic features of the face**  
The following structure reached consensus for this diagnosis: Pseudonetwork pattern

To ensure agreement on representative teaching images for this structure, we have provided the percentage of panelists who voted "agree" or "strongly agree".

Images with < 70% positive votes did not reach preliminary consensus and are indicated with red text.

Please confirm your vote to finalize the decision on inclusion / exclusion of images as representative of this structure.

Dermoscopic features of the face: Pseudonetwork pattern. Below, please confirm your vote for EACH image if you agree that it is representative of this structure.

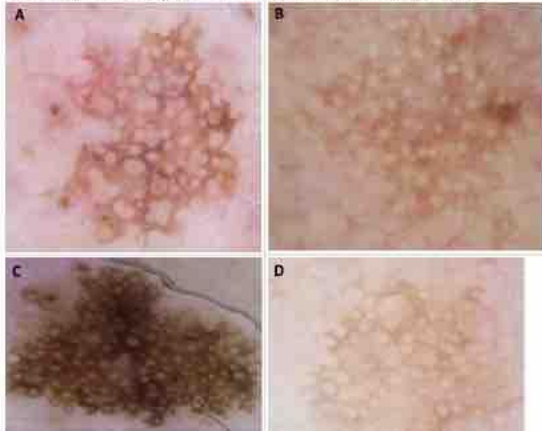

|                 |                                      |                                   |
|-----------------|--------------------------------------|-----------------------------------|
|                 | NO, this image is NOT representative | YES, this image IS representative |
| Image A (92.3%) | <input type="radio"/>                | <input type="radio"/>             |
| Image B (92.3%) | <input type="radio"/>                | <input type="radio"/>             |
| Image C (64.6%) | <input type="radio"/>                | <input type="radio"/>             |
| Image D (96.2%) | <input type="radio"/>                | <input type="radio"/>             |

Benign patterns of acral nevi: Parallel furrow pattern (with pattern variations including single line, double line, single dotted line, double dotted line)  
Below, please confirm your vote for EACH image if you agree that it is representative of this structure.

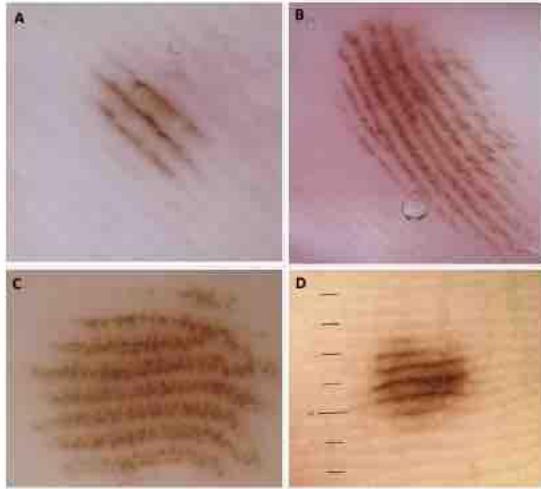

|                 | NO, this image is NOT representative | YES, this image IS representative |
|-----------------|--------------------------------------|-----------------------------------|
| Image A (100%)  | <input type="radio"/>                | <input type="radio"/>             |
| Image B (100%)  | <input type="radio"/>                | <input type="radio"/>             |
| Image C (96.2%) | <input type="radio"/>                | <input type="radio"/>             |
| Image D (96.2%) | <input type="radio"/>                | <input type="radio"/>             |

Benign patterns of acral nevi: Lattice-like pattern  
Below, please confirm your vote for EACH image if you agree that it is representative of this structure.

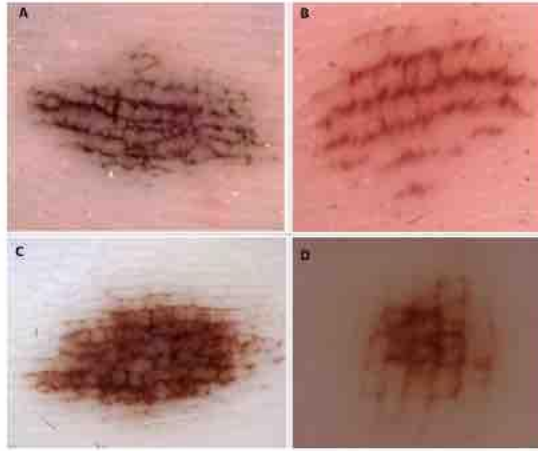

|                 | NO, this image is NOT representative | YES, this image IS representative |
|-----------------|--------------------------------------|-----------------------------------|
| Image A (92.3%) | <input type="radio"/>                | <input type="radio"/>             |
| Image B (96.2%) | <input type="radio"/>                | <input type="radio"/>             |
| Image C (96.2%) | <input type="radio"/>                | <input type="radio"/>             |
| Image D (100%)  | <input type="radio"/>                | <input type="radio"/>             |

Benign patterns of acral nevi: Fibrillar pattern (soles only)  
Below, please confirm your vote for EACH image if you agree that it is representative of this structure.

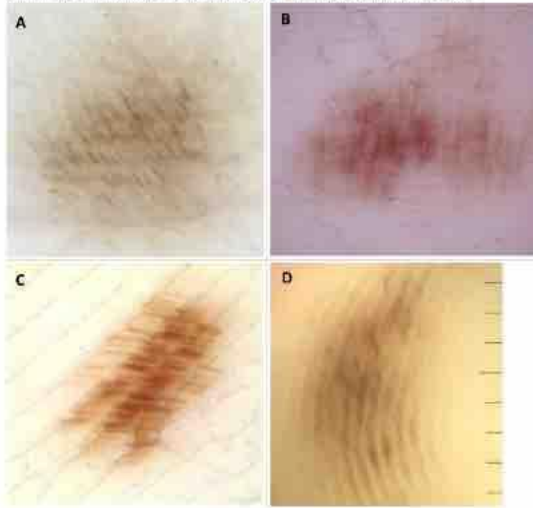

|                 | NO, this image is NOT representative | YES, this image IS representative |
|-----------------|--------------------------------------|-----------------------------------|
| Image A (88.5%) | <input type="radio"/>                | <input type="radio"/>             |
| Image B (88.5%) | <input type="radio"/>                | <input type="radio"/>             |
| Image C (100%)  | <input type="radio"/>                | <input type="radio"/>             |
| Image D (84.6%) | <input type="radio"/>                | <input type="radio"/>             |

Benign patterns of acral nevi: Homogenous pattern  
Below, please confirm your vote for EACH image if you agree that it is representative of this structure.

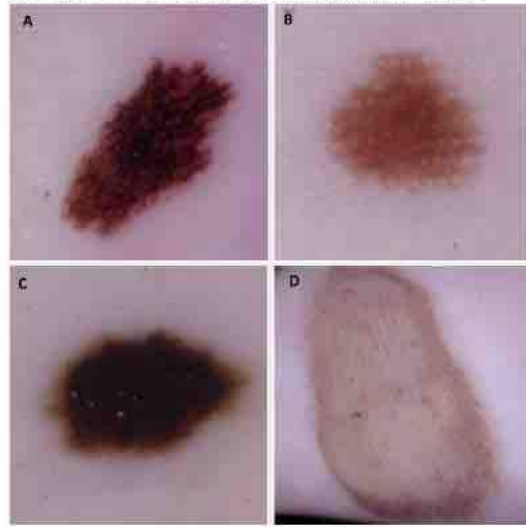

|                 | NO, this image is NOT representative | YES, this image IS representative |
|-----------------|--------------------------------------|-----------------------------------|
| Image A (42.3%) | <input type="radio"/>                | <input type="radio"/>             |
| Image B (100%)  | <input type="radio"/>                | <input type="radio"/>             |
| Image C (80.0%) | <input type="radio"/>                | <input type="radio"/>             |
| Image D (42.3%) | <input type="radio"/>                | <input type="radio"/>             |

Design patterns of acral nevus: Pits in a pod pattern (parallel furrow + globules on ridges) (congenital nevus)  
 Below, please confirm your vote for EACH image if you agree that it is representative of this structure.

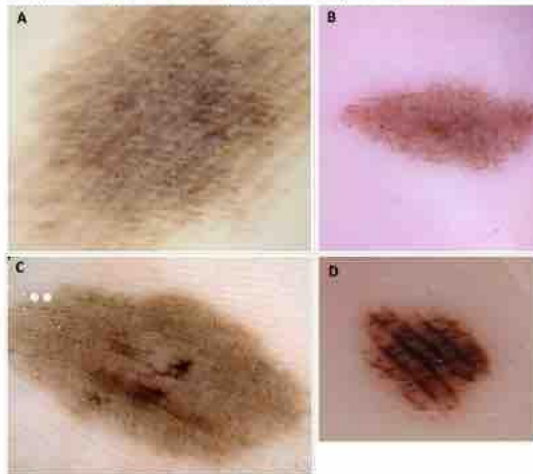

|                 |                                      |                                   |
|-----------------|--------------------------------------|-----------------------------------|
|                 | NO, this image is NOT representative | YES, this image is representative |
| Image A (58%)   | <input type="radio"/>                | <input type="radio"/>             |
| Image B (61.5%) | <input type="radio"/>                | <input type="radio"/>             |
| Image C (100%)  | <input type="radio"/>                | <input type="radio"/>             |
| Image D (100%)  | <input type="radio"/>                | <input type="radio"/>             |

**SPECIAL SITES / OTHER: Nevus of the nail**  
 The following structures reached consensus for this diagnosis: Homogenous brown background coloration, Uniform band thickness, color, and spacing with parallel band configuration.

To ensure agreement on representative teaching images for each structure, we have provided the percentage of panelists who voted "agree" or "strongly agree" for each.

Images with < 70% positive votes did not reach preliminary consensus and are indicated with red text.

Please confirm your vote to finalize the decision on inclusion / exclusion of images as representative of each structure.

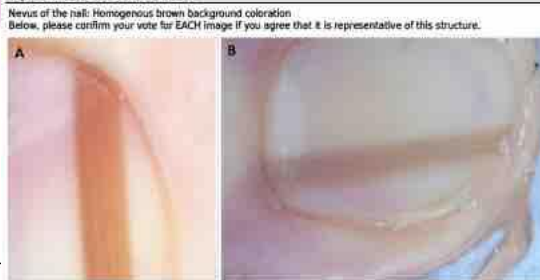

|                 |                                      |                                   |
|-----------------|--------------------------------------|-----------------------------------|
|                 | NO, this image is NOT representative | YES, this image is representative |
| Image A (96.2%) | <input type="radio"/>                | <input type="radio"/>             |
| Image B (92.3%) | <input type="radio"/>                | <input type="radio"/>             |

Nevus of the nail: Uniform band thickness, color, and spacing with parallel band configuration.  
 Below, please confirm your vote for EACH image if you agree that it is representative of this structure.

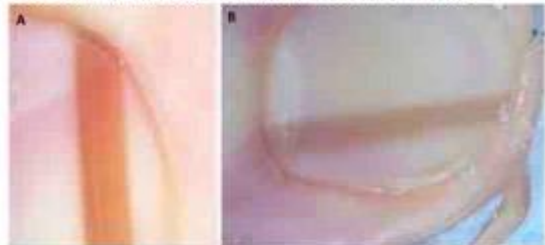

|                |                                      |                                   |
|----------------|--------------------------------------|-----------------------------------|
|                | NO, this image is NOT representative | YES, this image is representative |
| Image A (100%) | <input type="radio"/>                | <input type="radio"/>             |
| Image B (100%) | <input type="radio"/>                | <input type="radio"/>             |

**SPECIAL SITES / OTHER: Lentigo of the nail (melanotic macule of the nail)**  
 The following structure reached consensus for this diagnosis: Multiple thin homogenous gray lines (or single gray band) +/- gray background

To ensure agreement on representative teaching images for this structure, we have provided the percentage of panelists who voted "agree" or "strongly agree" for each.

Images with < 70% positive votes did not reach preliminary consensus and are indicated with red text.

Please confirm your vote to finalize the decision on inclusion / exclusion of images as representative of this structure.

Lentigo of the nail (melanotic macule of the nail): Multiple thin homogenous gray lines (or single gray band) +/- gray background  
 Below, please confirm your vote for EACH image if you agree that it is representative of this structure.

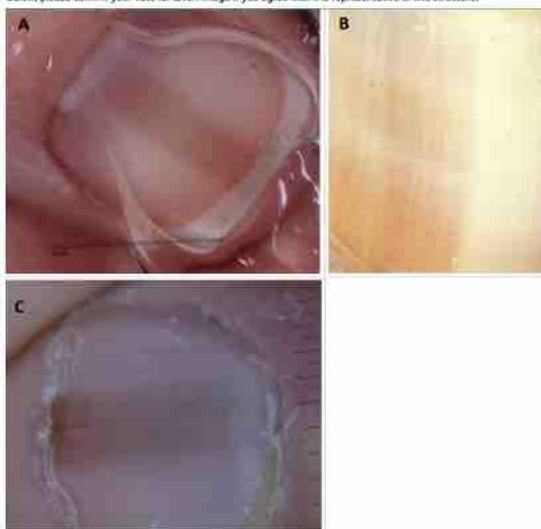

|                 |                                      |                                   |
|-----------------|--------------------------------------|-----------------------------------|
|                 | NO, this image is NOT representative | YES, this image is representative |
| Image A (92.3%) | <input type="radio"/>                | <input type="radio"/>             |
| Image B (73.1%) | <input type="radio"/>                | <input type="radio"/>             |
| Image C (76.9%) | <input type="radio"/>                | <input type="radio"/>             |

**SPECIAL SITES / OTHER: Melanoma of the nail**  
 The following structures reached consensus for this diagnosis: Triangular shape of pigment band (band diameter wider at proximal end), Pigmentation of periungual skin (micro-Hutchinson's sign), Brown to black dots/globules associated with longitudinal lines, Longitudinal brown/black lines with irregular spacing, width, color, or parallelism, Band width >3mm or >2/3 nail plate width

To ensure agreement on representative teaching images for each structure, we have provided the percentage of panelists who voted "agree" or "strongly agree" for each.

Images with < 70% positive votes did not reach preliminary consensus and are indicated with red text.

Please confirm your vote to finalize the decision on inclusion / exclusion of images as representative of each structure.

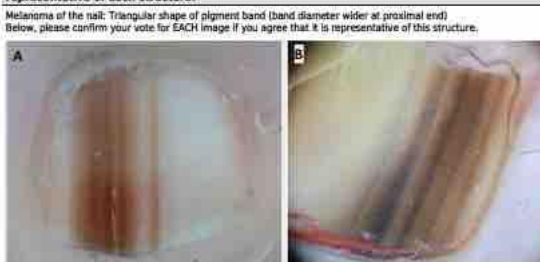

|                 |                                      |                                   |
|-----------------|--------------------------------------|-----------------------------------|
|                 | NO, this image is NOT representative | YES, this image is representative |
| Image A (30.8%) | <input type="radio"/>                | <input type="radio"/>             |
| Image B (50%)   | <input type="radio"/>                | <input type="radio"/>             |

Melanoma of the nail: Triangular shape of pigment band (band diameter wider at proximal end) [ADDITIONAL IMAGE]  
 Less than half of the provided images for 'triangular shape of pigment band' reached preliminary consensus. In order to ensure adequate provision of exemplary teaching images for evaluation, we have included the following additional image.

Please rate how well you believe this image is representative of the indicated structure.

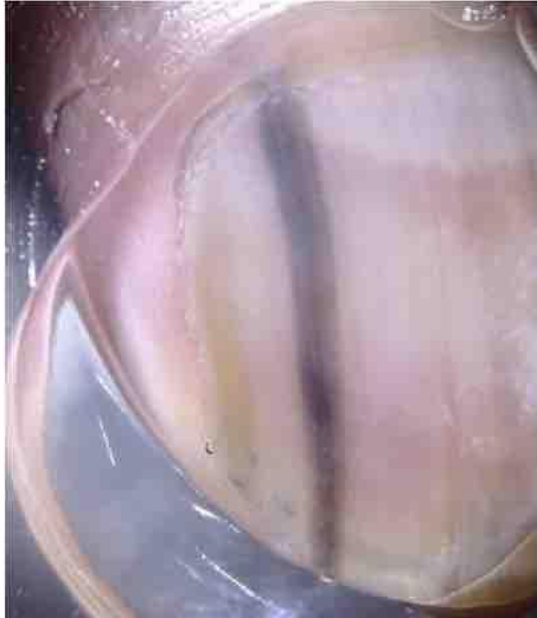

Additional image (NEW)      Strongly disagree      Disagree      Neutral      Agree      Strongly agree

Melanoma of the nail: Pigmentation of perungual skin (micro-Hutchinson's sign)  
 Below, please confirm your vote for EACH image if you agree that it is representative of this structure.

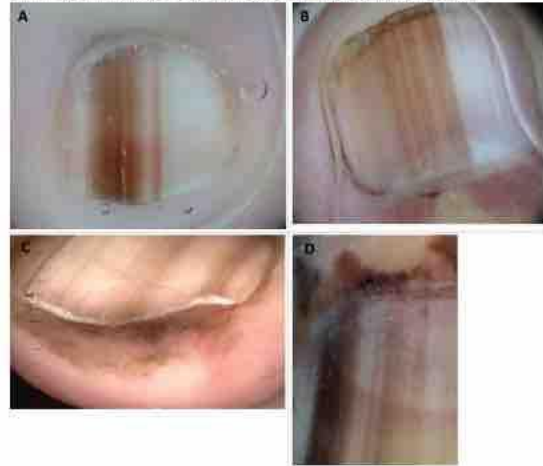

|                 |                                      |                                   |
|-----------------|--------------------------------------|-----------------------------------|
|                 | NO, this image is NOT representative | YES, this image IS representative |
| Image A (53.8%) | <input type="radio"/>                | <input type="radio"/>             |
| Image B (96.2%) | <input type="radio"/>                | <input type="radio"/>             |
| Image C (96.2%) | <input type="radio"/>                | <input type="radio"/>             |
| Image D (96.2%) | <input type="radio"/>                | <input type="radio"/>             |

Melanoma of the nail: Longitudinal brown/black lines with irregular spacing, width, color, or parallelism  
 Below, please confirm your vote for EACH image if you agree that it is representative of this structure.

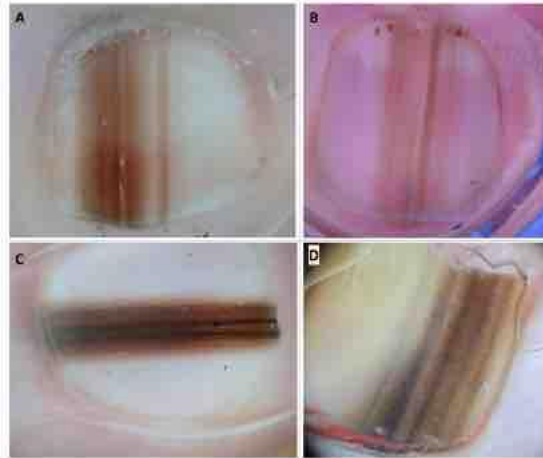

|                 |                                      |                                   |
|-----------------|--------------------------------------|-----------------------------------|
|                 | NO, this image is NOT representative | YES, this image IS representative |
| Image A (100%)  | <input type="radio"/>                | <input type="radio"/>             |
| Image B (100%)  | <input type="radio"/>                | <input type="radio"/>             |
| Image C (88.5%) | <input type="radio"/>                | <input type="radio"/>             |
| Image D (96.2%) | <input type="radio"/>                | <input type="radio"/>             |

Melanoma of the nail: Brown to black dots/globules associated with longitudinal lines  
 Below, please confirm your vote for EACH image if you agree that it is representative of this structure.

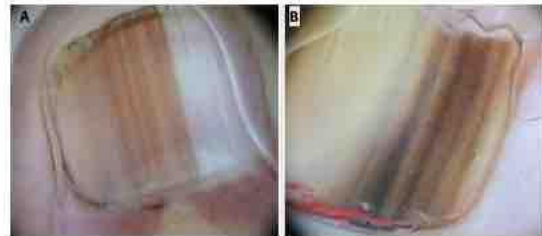

|                 |                                      |                                   |
|-----------------|--------------------------------------|-----------------------------------|
|                 | NO, this image is NOT representative | YES, this image IS representative |
| Image A (92.3%) | <input type="radio"/>                | <input type="radio"/>             |
| Image B (85.4%) | <input type="radio"/>                | <input type="radio"/>             |

Melanoma of the nail: Band width >3mm or >2/3 of nail plate width  
 Below, please confirm your vote for EACH image if you agree that it is representative of this structure.

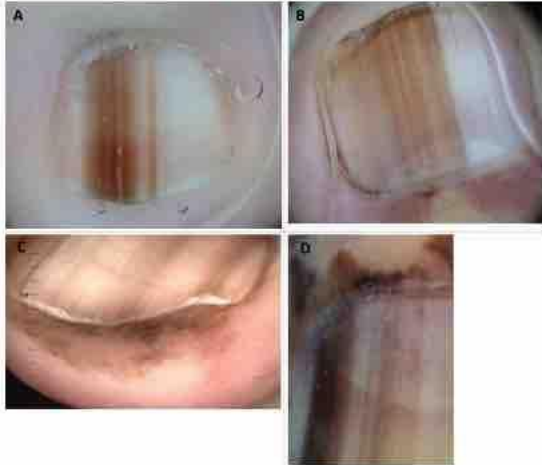

|                 | NO, this image is NOT representative | YES, this image is representative |
|-----------------|--------------------------------------|-----------------------------------|
| Image A (100%)  | <input type="radio"/>                | <input type="radio"/>             |
| Image B (100%)  | <input type="radio"/>                | <input type="radio"/>             |
| Image C (88.5%) | <input type="radio"/>                | <input type="radio"/>             |
| Image D (84.6%) | <input type="radio"/>                | <input type="radio"/>             |

**SPECIAL SITES / OTHER: Subungual hemorrhage**  
 The following structures reached consensus for this diagnosis: Well circumscribed red-black dots or blotches, Distal streaks of red-brown coloration ("filamentous" distal end), Homogenous red/purple/black coloration without melanin granules.

To ensure agreement on representative teaching images for each structure, we have provided the percentage of panelists who voted "agree" or "strongly agree" for each.

Images with < 70% positive votes did not reach preliminary consensus and are indicated with red text.

Please confirm your vote to finalize the decision on inclusion / exclusion of images as representative of each structure.

Subungual hemorrhage: Well circumscribed red-black dots or blotches  
 Below, please confirm your vote for EACH image if you agree that it is representative of this structure.

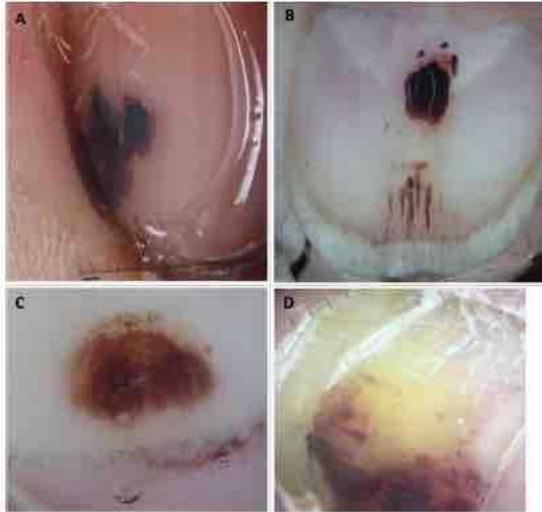

|                 | NO, this image is NOT representative | YES, this image is representative |
|-----------------|--------------------------------------|-----------------------------------|
| Image A (92.3%) | <input type="radio"/>                | <input type="radio"/>             |
| Image B (100%)  | <input type="radio"/>                | <input type="radio"/>             |
| Image C (88.5%) | <input type="radio"/>                | <input type="radio"/>             |
| Image D (88.5%) | <input type="radio"/>                | <input type="radio"/>             |

Subungual hemorrhage: Distal streaks of red-brown coloration ("filamentous" distal end)  
 Below, please confirm your vote for EACH image if you agree that it is representative of this structure.

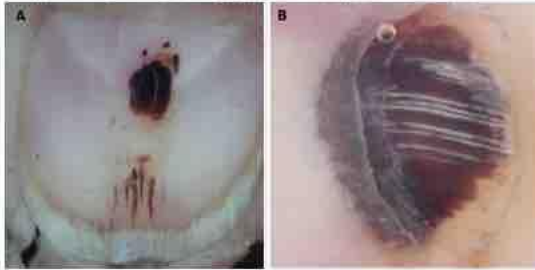

|                 | NO, this image is NOT representative | YES, this image is representative |
|-----------------|--------------------------------------|-----------------------------------|
| Image A (100%)  | <input type="radio"/>                | <input type="radio"/>             |
| Image B (92.3%) | <input type="radio"/>                | <input type="radio"/>             |

Subungual hemorrhage: Homogenous red/purple/black coloration without melanin granules  
 Below, please confirm your vote for EACH image if you agree that it is representative of this structure.

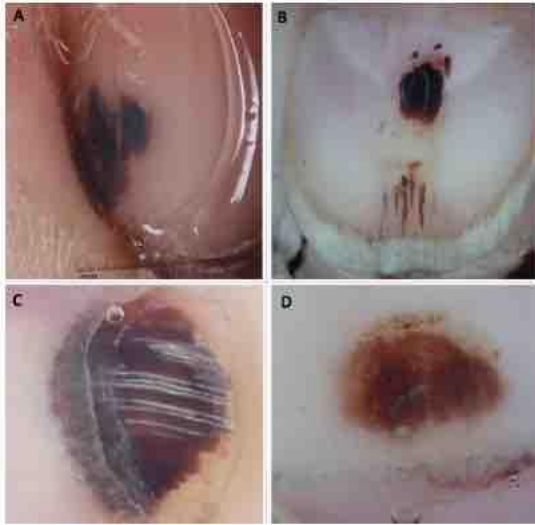

|                 |                                      |                                   |
|-----------------|--------------------------------------|-----------------------------------|
|                 | NO, this image is NOT representative | YES, this image is representative |
| Image A (92.3%) | <input type="radio"/>                | <input type="radio"/>             |
| Image B (96.2%) | <input type="radio"/>                | <input type="radio"/>             |
| Image C (92.3%) | <input type="radio"/>                | <input type="radio"/>             |
| Image D (88.5%) | <input type="radio"/>                | <input type="radio"/>             |

**SPECIAL SITES / OTHER: Scabies**

The following structures reached consensus for this diagnosis: Delta-wing jet with contrail sign (small dark brown triangular structure located at the end of whitish structureless curved / wavy lines)

To ensure agreement on representative teaching images for this structure, we have provided the percentage of panelists who voted "agree" or "strongly agree".

Images with < 70% positive votes did not reach preliminary consensus and are indicated with red text.

Please confirm your vote to finalize the decision on inclusion / exclusion of images as representative of this structure.

Scabies: Delta-wing jet with contrail sign (small dark brown triangular structure located at the end of whitish structureless curved / wavy lines)

Below, please confirm your vote for EACH image if you agree that it is representative of this structure.

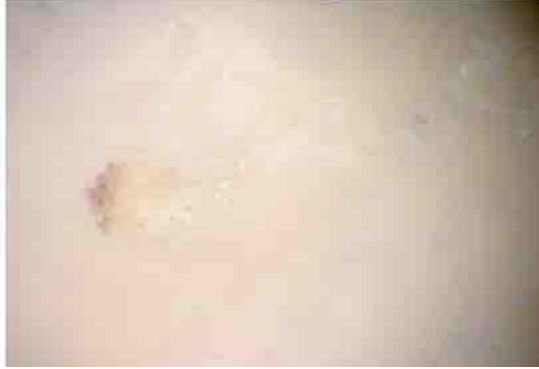

|                 |                                      |                                   |
|-----------------|--------------------------------------|-----------------------------------|
|                 | NO, this image is NOT representative | YES, this image is representative |
| Image A (65.4%) | <input type="radio"/>                | <input type="radio"/>             |

Scabies: Delta-wing jet with contrail sign (small dark brown triangular structure located at the end of whitish structureless curved / wavy lines) [ADDITIONAL IMAGES]  
 Less than half of the provided images for "Delta-wing jet with contrail sign (small dark brown triangular structure located at the end of whitish structureless curved / wavy lines)" reached preliminary consensus. In order to ensure adequate provision of exemplary teaching images for evaluation, we have included the following additional images.

Please rate how well you believe EACH image is representative of the indicated structure.

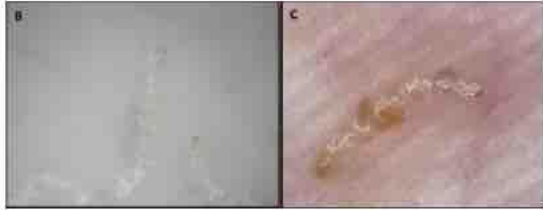

|               |                       |                       |                       |                       |                       |
|---------------|-----------------------|-----------------------|-----------------------|-----------------------|-----------------------|
|               | Strongly disagree     | Disagree              | Neutral               | Agree                 | Strongly agree        |
| Image B (NEW) | <input type="radio"/> |
| Image C (NEW) | <input type="radio"/> |

Please add any additional comments here:

## DERMOSCOPIIC IMAGES – ROUND 3

**BENIGN MELANOCYTIC:** Overview of benign nevi patterns: Two-component pattern. Additional images were provided for this structure. To ensure agreement, we have provided the percentage of panelists who voted "agree" or "strongly agree".

Please confirm your vote to finalize the decision on inclusion / exclusion of this image as representative.

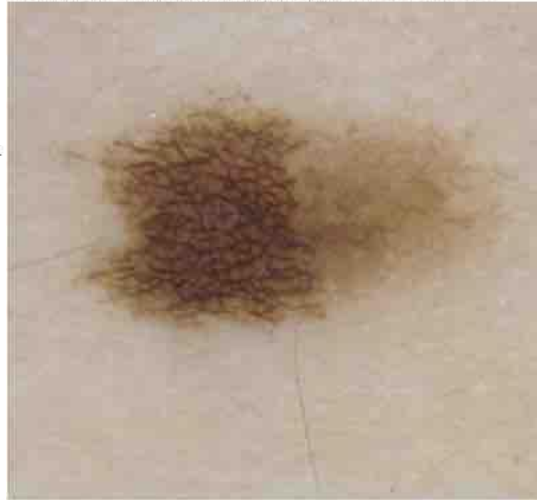

Additional image (92.3%)  NO, this image is NOT representative  YES, this image is representative

**NONMELANOCYTIC:** Squamous cell carcinoma: Hairpin vessels, usually with whitish halo. Additional images were provided for this structure. To ensure agreement, we have provided the percentage of panelists who voted "agree" or "strongly agree".

Please confirm your vote to finalize the decision on inclusion / exclusion of each image as representative.

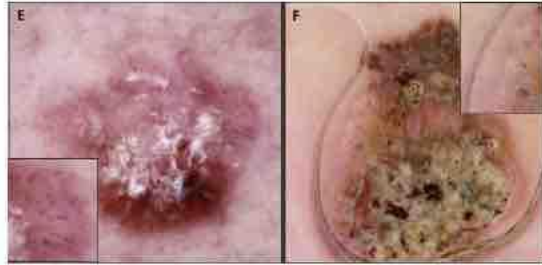

Image E (96.2%)  NO, this image is NOT representative  YES, this image is representative  
Image F (100%)

**SPECIAL SITES / OTHER:** Melanoma of the nail: Triangular shape of pigment band (band diameter wider at proximal end). An additional image was provided for this structure. To ensure agreement, we have provided the percentage of panelists who voted "agree" or "strongly agree".

Please confirm your vote to finalize the decision on inclusion / exclusion of this image as representative.

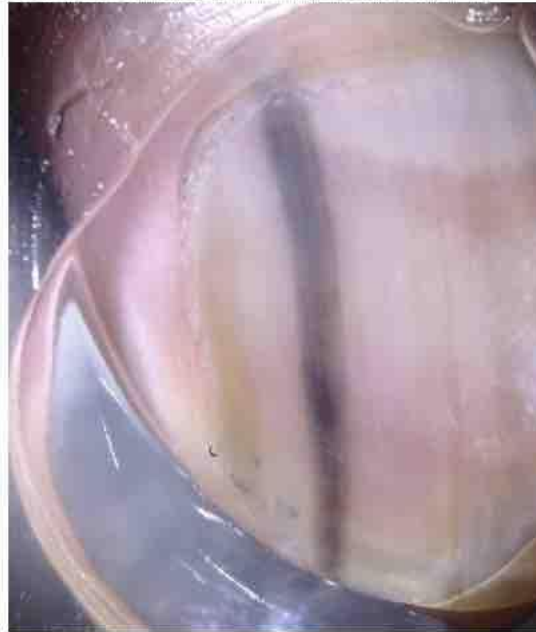

**BENIGN MELANOCYTIC:** Congenital melanocytic nevi: Diffuse background pigmentation. An additional image was provided for this structure. To ensure agreement, we have provided the percentage of panelists who voted "agree" or "strongly agree".

Please confirm your vote to finalize the decision on inclusion / exclusion of each image as representative.

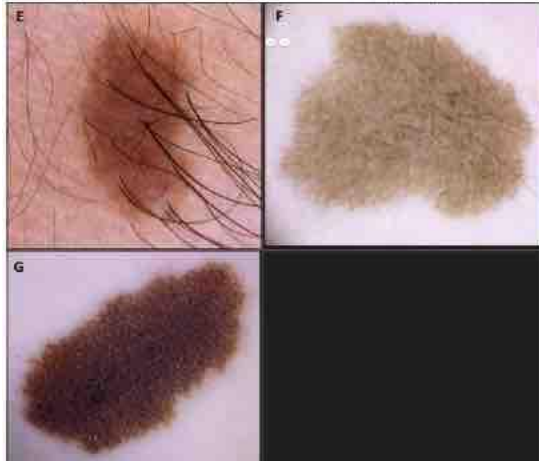

Image E (92.3%)  NO, this image is NOT representative  YES, this image is representative  
Image F (84.6%)    
Image G (73.1%)

Additional image (38.5%)

|                                      |                       |                                   |                       |
|--------------------------------------|-----------------------|-----------------------------------|-----------------------|
| NO, this image is NOT representative | <input type="radio"/> | YES, this image is representative | <input type="radio"/> |
|--------------------------------------|-----------------------|-----------------------------------|-----------------------|

**SPECIAL SITES / OTHER, Scabies:** Delta-wing jet with central sign (small dark brown triangular structure located at the end of whitish structureless curved / wavy lines)  
Additional images were provided for this structure. To ensure agreement, we have provided the percentage of panelists who voted "agree" or "strongly agree".

Please confirm your vote to finalize the decision on inclusion / exclusion of each image as representative.

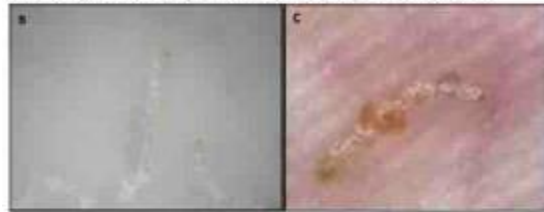

|                 |                                      |                       |                                   |                       |
|-----------------|--------------------------------------|-----------------------|-----------------------------------|-----------------------|
| Image B (92.3%) | NO, this image is NOT representative | <input type="radio"/> | YES, this image is representative | <input type="radio"/> |
| Image C (92.3%) |                                      | <input type="radio"/> |                                   | <input type="radio"/> |
